# Supplementary material for: Comparative Physiological and Transcriptome Analysis of <em>Crossostephium chinense</em> Reveals Its Molecular Mechanisms of Salt Tolerance
Source: Preprints.org preprint supplement (doi:10.20944/preprints202310.0151.v1), 2023-10-03
Supplement: Supplementary file 1 [file Table S1.xlsx]

## Sheet: Primer sequences
Gene ID	Primer sequences
Actin-F	CTGACAGGATGAGCAAGGAAATCAC
Actin-R	GAACAATGGATGGGCCAGACTC
TRINITY_DN83699_c2_g1-F	CGCGATCGAAGACCGAATAA
TRINITY_DN83699_c2_g1-R	CCCGGAAGTTGGTTCGAATA
TRINITY_DN78448_c0_g4-F	CCTGTCGAGTGTTGCTAGTG
TRINITY_DN78448_c0_g4-R	CATCGTCAGTCCTTTCATCCTC
TRINITY_DN66554_c0_g1-F	CCATCCTATAGGCCCAAACC
TRINITY_DN66554_c0_g1-R	GCTGGAAGACCTGAGATGAC
TRINITY_DN80388_c0_g1-F	GAACGGAAAGAAGCGGAGAA
TRINITY_DN80388_c0_g1-R	GGCCATCGTAAACACCGTAA
TRINITY_DN77201_c0_g1-F	CCCTGCACAGAGAATCACAA
TRINITY_DN77201_c0_g1-R	CGAGATCATACAGTCCAACAGG
TRINITY_DN59565_c0_g1-F	CCCTGGTTCAGGAAAGGATTAG
TRINITY_DN59565_c0_g1-R	GTCAAACCCGGTTGATAGAGAG
TRINITY_DN72632_c0_g1-F	CTTCCTCTTCCACCCTCAAAC
TRINITY_DN72632_c0_g1-R	GTCCACTCCACGTAGGATTTC
TRINITY_DN61103_c1_g2-F	GAGGGCGGTTGAGGAATAAA
TRINITY_DN61103_c1_g2-R	GTGAACCACCATGACCATCA
