# Supplementary material for: Comparative Physiological and Transcriptome Analysis of <em>Crossostephium chinense</em> Reveals Its Molecular Mechanisms of Salt Tolerance
Source: Preprints.org preprint supplement (doi:10.20944/preprints202310.0151.v1), 2023-10-03
Supplement: Supplementary file 2 [file Table S2.xlsx]

## Sheet: sequencing quality
Sample	Total raw reads	Total valid reads	Total raw bases	Total valid bases	Valid%	Q20%	Q30%
A1	46151894	45522750	6.92G	6.38G	98.64	98.15	94.97
A2	46321214	45262110	6.95G	6.34G	97.71	97.88	94.47
A3	40156544	36311294	6.06G	5.08G	90.42	96.02	92.79
B1	54645776	54209862	8.20G	7.61G	99.2	98.31	95.16
B2	52157730	51513486	7.82G	7.22G	98.76	98.17	95
B3	52274178	51725216	7.84G	7.25G	98.95	98.07	94.79
C1	41422430	37116210	6.25G	5.20G	89.6	96.36	93.12
C2	37583850	36114106	5.64G	5.04G	96.09	96.85	92.26
C3	41629074	39219668	6.29G	5.49G	94.21	96.55	93.13
D1	34325126	32625062	5.18G	4.57G	95.05	96.53	93.05
D2	47370944	45407864	7.14G	6.36G	95.86	97.11	93.83
D3	50546424	47776892	7.61G	6.69G	94.52	96.99	93.78
E1	38044564	35740992	5.74G	5.00G	93.95	96.23	92.83
E2	32991400	30878418	4.95G	4.31G	93.6	96.72	92.22
E3	38630524	36015354	5.83G	5.04G	93.23	96.11	92.73
F1	46946972	44086376	7.07G	6.17G	93.91	96.88	93.7
F2	44720272	41500746	6.75G	5.81G	92.8	96.13	92.79
F3	41246054	36948694	6.23G	5.17G	89.58	95.85	92.66
G1	39727218	34116618	6.00G	4.78G	85.88	95.89	93.06
G2	35526712	30024710	5.36G	4.20G	84.51	95.78	93
G3	42925904	37917164	6.44G	5.29G	88.33	96.49	92.14
H1	37888220	34456416	5.72G	4.83G	90.94	96.53	93.32
H2	36311626	32683382	5.48G	4.58G	90.01	96.41	93.19
H3	45368210	41282212	6.85G	5.78G	90.99	96.41	93.12
I1	51766000	46328044	7.80G	6.49G	89.5	96.95	94.02
I2	49634000	45387086	7.48G	6.36G	91.44	96.9	93.83
I3	34088890	31071128	5.15G	4.35G	91.15	96.19	92.94
J1	37512078	35133208	5.66G	4.92G	93.66	96.31	92.98
J2	49937086	46333150	7.52G	6.49G	92.78	96.96	93.8
J3	40189740	38290968	6.07G	5.36G	95.28	96.31	92.82
