# Supplementary material for: Comparative Physiological and Transcriptome Analysis of <em>Crossostephium chinense</em> Reveals Its Molecular Mechanisms of Salt Tolerance
Source: Preprints.org preprint supplement (doi:10.20944/preprints202310.0151.v1), 2023-10-03
Supplement: Supplementary file 3 [file Table S3.xlsx]

## Sheet: de novo assembly
Index	All	GC%	Min length	Median length	Max length	Total Assembled Bases	N50
Transcript	354501	39.47	201	530	8843	259515919	1043
Gene	113700	39.63	201	411	8843	77246810	1070
