# Supplementary material for: Comparative Physiological and Transcriptome Analysis of <em>Crossostephium chinense</em> Reveals Its Molecular Mechanisms of Salt Tolerance
Source: Preprints.org preprint supplement (doi:10.20944/preprints202310.0151.v1), 2023-10-03
Supplement: Supplementary file 4 [file Table S4.xlsx]

## Sheet: Sheet1
Values	All	GO	KEGG	Pfam	swissport	eggNOG	NR
Number	113700	47524	38205	41362	39685	53490	63414
Ratio (%)	100	41.8	33.6	36.38	34.9	47.04	55.77
