# Supplementary material for: Comparative Physiological and Transcriptome Analysis of <em>Crossostephium chinense</em> Reveals Its Molecular Mechanisms of Salt Tolerance
Source: Preprints.org preprint supplement (doi:10.20944/preprints202310.0151.v1), 2023-10-03
Supplement: Supplementary file 5 [file Table S5.xlsx]

## Sheet: sheet 1
Module Name	Gene Number
black	1338
blue	5041
brown	2892
cyan	481
dakgreen	107
darkgrey	91
darkmagenta	40
darkolivegreen	45
darkorange	88
darkred	160
darkturquoise	96
green	2319
greenyellow	949
grey	4306
grey60	328
lightcyan	345
lightgreen	292
lightyellow	223
magenta	1037
midnightblue	401
orange	90
paleturquoise	54
pink	1092
purple	1016
red	1752
royalblue	190
saddlebrown	68
salmon	507
skyblue	74
steelblue	65
tan	592
turquoise	6176
violet	51
white	83
yellow	2371
