# Supplementary material for: Comparative Physiological and Transcriptome Analysis of <em>Crossostephium chinense</em> Reveals Its Molecular Mechanisms of Salt Tolerance
Source: Preprints.org preprint supplement (doi:10.20944/preprints202310.0151.v1), 2023-10-03
Supplement: Supplementary file 6 [file Table S6.xlsx]

## Sheet: yellow
Gene_ID	Gene_Name	Connectivity	Pathway_Name	KME_MM
TRINITY_DN76520_c0_g1	CIGR1	611.382	Plant hormone signal transduction	0.95
TRINITY_DN86528_c1_g1	PAT1	605.887	Plant hormone signal transduction	0.96
TRINITY_DN74476_c0_g5	-	540.702	Plant hormone signal transduction	0.93
TRINITY_DN77201_c0_g1	SRK2D	529.475	Plant hormone signal transduction	0.92
TRINITY_DN67988_c0_g2	-	512.666	Plant hormone signal transduction	0.89
TRINITY_DN82703_c1_g1	MEKK1	501.662	Plant hormone signal transduction	0.91
TRINITY_DN75552_c0_g1	SCL13	498.182	Plant hormone signal transduction	0.93
TRINITY_DN59915_c0_g1	RBOHB	443.981	Plant hormone signal transduction	0.91
TRINITY_DN72218_c0_g2	MKK3	408.799	Plant hormone signal transduction	0.89
TRINITY_DN67282_c0_g1	SCL14	407.059	Plant hormone signal transduction	0.88
TRINITY_DN74102_c0_g2	Os01g0583100	393.042	Plant hormone signal transduction	0.87
TRINITY_DN78426_c0_g1	TIFY4A	391.646	Plant hormone signal transduction	0.83
TRINITY_DN57808_c0_g1	SCL31	361.219	Plant hormone signal transduction	0.87
TRINITY_DN82153_c0_g1	COI1	311.559	Plant hormone signal transduction	0.84
TRINITY_DN79524_c0_g1	PUB11	305.366	Plant hormone signal transduction	0.84
TRINITY_DN65518_c0_g1	SCL5	303.17	Plant hormone signal transduction	0.79
TRINITY_DN64316_c0_g4	WRKY48	298.683	Plant hormone signal transduction	0.81
TRINITY_DN57808_c0_g2	SCL31	266.755	Plant hormone signal transduction	0.82
TRINITY_DN60522_c0_g2	SCL9	266.203	Plant hormone signal transduction	0.83
TRINITY_DN75658_c2_g3	RLM1B	251.036	Plant hormone signal transduction	0.81
TRINITY_DN77769_c0_g1	PAT1	244.997	Plant hormone signal transduction	0.69
TRINITY_DN67879_c0_g1	INRPK1	240.751	Plant hormone signal transduction	0.76
TRINITY_DN69823_c1_g3	RTH	226.428	Plant hormone signal transduction	0.78
TRINITY_DN82941_c1_g1	MKK5	205.327	Plant hormone signal transduction	0.73
TRINITY_DN55994_c0_g3	ARF24	204.985	Plant hormone signal transduction	0.79
TRINITY_DN56090_c0_g1	-	204.688	Plant hormone signal transduction	0.78
TRINITY_DN70761_c0_g2	MKS1	198.963	Plant hormone signal transduction	0.74
TRINITY_DN67259_c1_g6	-	197.642	Plant hormone signal transduction	0.74
TRINITY_DN87758_c2_g2	SCL14	193.06	Plant hormone signal transduction	0.73
TRINITY_DN81234_c0_g1	MMK2	181.272	MAPK signaling pathway - plant	0.75
TRINITY_DN56002_c0_g1	DPBF3	180.795	MAPK signaling pathway - plant	0.73
TRINITY_DN59403_c0_g1	CTL1	171.127	MAPK signaling pathway - plant	0.74
TRINITY_DN82213_c1_g1	HMA5	156.252	MAPK signaling pathway - plant	0.71
TRINITY_DN85519_c0_g1	IAA26	151.773	MAPK signaling pathway - plant	0.73
TRINITY_DN88061_c1_g2	RBOHC	150.982	MAPK signaling pathway - plant	0.75
TRINITY_DN58124_c0_g1	SAUR36	141.916	MAPK signaling pathway - plant	0.66
TRINITY_DN71164_c0_g1	EIN4	127.87	MAPK signaling pathway - plant	0.73
TRINITY_DN72384_c1_g1	At2g36090	125.36	MAPK signaling pathway - plant	0.7
TRINITY_DN73674_c1_g2	WRKY7	123.649	MAPK signaling pathway - plant	0.65
TRINITY_DN73774_c0_g2	At4g35230	119.63	MAPK signaling pathway - plant	0.71
TRINITY_DN84768_c0_g4	-	114.87	MAPK signaling pathway - plant	0.65
TRINITY_DN76408_c0_g2	MYC4	104.267	MAPK signaling pathway - plant	0.66
TRINITY_DN82786_c0_g2	RF2b	80.2874	MAPK signaling pathway - plant	0.57
TRINITY_DN87070_c1_g1	SCL14	77.0201	MAPK signaling pathway - plant	0.62
TRINITY_DN61209_c0_g1	SAUR36	69.3377	MAPK signaling pathway - plant	0.56
TRINITY_DN81026_c0_g3	At5g41260	61.7139	MAPK signaling pathway - plant	0.61
TRINITY_DN61861_c0_g4	SAUR41	57.3733	MAPK signaling pathway - plant	0.56
TRINITY_DN74126_c0_g1	-	40.5313	MAPK signaling pathway - plant	0.48
TRINITY_DN61805_c0_g2	ARR5	17.9556	MAPK signaling pathway - plant	0.24

## Sheet: green
Gene_ID	Gene_Name	Connectivity	Pathway_Name	KME_MM
TRINITY_DN78705_c0_g2	PP2CA	524.296	Plant hormone signal transduction; MAPK signaling pathway-plant	0.97
TRINITY_DN61103_c1_g2	ABI1	521.379	Plant hormone signal transduction; MAPK signaling pathway-plant	0.98
TRINITY_DN80528_c1_g1	ABF2	511.969	Plant hormone signal transduction	0.98
TRINITY_DN80388_c0_g1	PP2CA	476.754	Plant hormone signal transduction; MAPK signaling pathway-plant	0.96
TRINITY_DN78705_c0_g1	PP2CA	440.425	Plant hormone signal transduction; MAPK signaling pathway-plant	0.95
TRINITY_DN76037_c0_g3	At2g29380	435.158	Plant hormone signal transduction; MAPK signaling pathway-plant	0.94
TRINITY_DN77362_c0_g1	At2g29380	427.983	Plant hormone signal transduction; MAPK signaling pathway-plant	0.94
TRINITY_DN79222_c0_g1	HAB2	423.072	Plant hormone signal transduction; MAPK signaling pathway-plant	0.91
TRINITY_DN76911_c0_g1	PYL9	417.864	Plant hormone signal transduction; MAPK signaling pathway-plant	0.92
TRINITY_DN65019_c1_g3	-	405.157	Plant hormone signal transduction; MAPK signaling pathway-plant	0.93
TRINITY_DN74918_c0_g2	MEKK1	401.011	MAPK signaling pathway - plant	0.89
TRINITY_DN70712_c0_g1	mkkA	400.546	MAPK signaling pathway - plant	0.93
TRINITY_DN65128_c1_g1	SAPK3	394.138	MAPK signaling pathway - plant	0.93
TRINITY_DN80441_c1_g1	RTE1	388.406	MAPK signaling pathway - plant	0.91
TRINITY_DN61103_c1_g8	-	384.48	MAPK signaling pathway - plant	0.9
TRINITY_DN86870_c0_g3	HAB2	382.816	MAPK signaling pathway - plant	0.92
TRINITY_DN86870_c0_g1	HAB1	376.97	MAPK signaling pathway - plant	0.89
TRINITY_DN79268_c0_g4	WRKY6	368.867	MAPK signaling pathway - plant	0.92
TRINITY_DN60487_c0_g3	GID1B	368.289	Plant hormone signal transduction	0.9
TRINITY_DN69027_c0_g1	AHG1	364.423	Plant hormone signal transduction; MAPK signaling pathway-plant	0.89
TRINITY_DN78705_c0_g3	PP2CA	364.133	Plant hormone signal transduction; MAPK signaling pathway-plant	0.89
TRINITY_DN70745_c0_g2	AHG1	349.326	Plant hormone signal transduction; MAPK signaling pathway-plant	0.88
TRINITY_DN57926_c0_g1	ABF4	337.402	Plant hormone signal transduction	0.89
TRINITY_DN71378_c0_g2	Os01g0583100	321.643	Plant hormone signal transduction; MAPK signaling pathway-plant	0.88
TRINITY_DN78694_c3_g1	ABF2	304.326	Plant hormone signal transduction	0.87
TRINITY_DN78006_c1_g2	HAB2	303.909	Plant hormone signal transduction; MAPK signaling pathway-plant	0.83
TRINITY_DN80528_c1_g8	ABF4	280.433	Plant hormone signal transduction	0.86
TRINITY_DN79572_c0_g1	ABF1	271.96	Plant hormone signal transduction	0.8
TRINITY_DN76911_c0_g2	PYL8	269.688	Plant hormone signal transduction; MAPK signaling pathway-plant	0.78
TRINITY_DN70632_c0_g2	SAPK1	260.224	Plant hormone signal transduction; MAPK signaling pathway-plant	0.81
TRINITY_DN84002_c1_g1	TIR1	257.15	Plant hormone signal transduction	0.8
TRINITY_DN60487_c0_g1	GID1B	253.235	Plant hormone signal transduction	0.84
TRINITY_DN70512_c0_g1	BHLH80	249.787	Plant hormone signal transduction	0.81
TRINITY_DN74102_c0_g1	HAB1	249.057	Plant hormone signal transduction; MAPK signaling pathway-plant	0.78
TRINITY_DN80585_c0_g5	ABF2	240.109	Plant hormone signal transduction	0.82
TRINITY_DN82196_c2_g2	MYC2	235.466	Plant hormone signal transduction; MAPK signaling pathway-plant	0.87
TRINITY_DN74936_c0_g2	LAX2	230.988	Plant hormone signal transduction	-0.83
TRINITY_DN65518_c0_g2	CIGR2	229.718	Plant hormone signal transduction	0.77
TRINITY_DN81234_c1_g1	MMK2	223.498	MAPK signaling pathway - plant	0.82
TRINITY_DN69093_c0_g1	WRKY7	211.882	MAPK signaling pathway - plant	0.74
TRINITY_DN66344_c0_g1	WRKY24	211.583	MAPK signaling pathway - plant	0.83
TRINITY_DN63903_c0_g3	-	206.459	MAPK signaling pathway - plant	0.72
TRINITY_DN82895_c1_g3	MPK4	204.921	MAPK signaling pathway - plant	0.79
TRINITY_DN71462_c0_g1	IAA8	201.679	Plant hormone signal transduction	0.76
TRINITY_DN59403_c0_g2	CTL1	196.601	MAPK signaling pathway - plant	0.76
TRINITY_DN56253_c0_g1	XTH23	196.213	Plant hormone signal transduction	0.76
TRINITY_DN84768_c0_g3	CAT1	195.601	MAPK signaling pathway - plant	0.71
TRINITY_DN72955_c0_g1	PP2CA	193.531	Plant hormone signal transduction	0.71
TRINITY_DN66451_c0_g2	WRKY71	192.948	MAPK signaling pathway - plant	0.76
TRINITY_DN59970_c2_g4	SAPK7	167.723	MAPK signaling pathway - plant	0.71
TRINITY_DN77673_c1_g1	IAA16	165.772	Plant hormone signal transduction	0.76
TRINITY_DN65688_c0_g2	SAPK7	157.847	Plant hormone signal transduction	0.72
TRINITY_DN85780_c1_g3	O10	157.476	MAPK signaling pathway - plant	0.75
TRINITY_DN58204_c0_g1	BHLH104	150.995	Plant hormone signal transduction	0.73
TRINITY_DN60487_c0_g2	GID1B	148.75	Plant hormone signal transduction	0.76
TRINITY_DN73266_c0_g3	VIP1	136.773	MAPK signaling pathway - plant	0.67
TRINITY_DN61647_c0_g2	HAB1	131.758	Plant hormone signal transduction	0.66
TRINITY_DN76399_c1_g1	At5g23350	129.927	Plant hormone signal transduction	0.68
TRINITY_DN78694_c3_g2	ABF2	127.201	Plant hormone signal transduction	0.54
TRINITY_DN56376_c0_g1	SAUR36	117.197	Plant hormone signal transduction	0.69
TRINITY_DN83314_c0_g1	ABF1	114.774	Plant hormone signal transduction	0.69
TRINITY_DN87334_c2_g1	MPK19	94.3807	MAPK signaling pathway - plant	0.65
TRINITY_DN63324_c0_g2	WRKY35	92.5812	MAPK signaling pathway - plant	-0.69
TRINITY_DN75144_c0_g1	GAI1	92.9678	Plant hormone signal transduction	-0.66
TRINITY_DN60823_c0_g1	TIFY10A	90.2975	Plant hormone signal transduction	0.63
TRINITY_DN88129_c1_g3	AUX1	84.2262	Plant hormone signal transduction	-0.63
TRINITY_DN75475_c0_g1	UNE12	80.2805	Plant hormone signal transduction	-0.68
TRINITY_DN73854_c0_g2	-	76.2067	MAPK signaling pathway - plant	0.59
TRINITY_DN76674_c0_g2	UNE12	60.9289	MAPK signaling pathway - plant	0.53
TRINITY_DN77515_c0_g1	BHLH25	23.5934	Plant hormone signal transduction	0.43

## Sheet: brown
Gene_ID	Gene_Name	Connectivity	Pathway_Name	KME_MM
TRINITY_DN77681_c0_g1	ARF9	769.151	Plant hormone signal transduction	0.95
TRINITY_DN65087_c0_g12	-	752.19	Plant hormone signal transduction; MAPK signaling pathway-plant	0.94
TRINITY_DN88145_c0_g1	-	750.818	MAPK signaling pathway - plant	0.95
TRINITY_DN88145_c0_g2	-	680.264	MAPK signaling pathway - plant	0.93
TRINITY_DN58366_c0_g4	AUX28	641.291	Plant hormone signal transduction	0.93
TRINITY_DN75923_c1_g1	SRK2B	640.321	Plant hormone signal transduction; MAPK signaling pathway-plant	0.92
TRINITY_DN87869_c0_g1	ERS1	622.347	Plant hormone signal transduction; MAPK signaling pathway-plant	0.91
TRINITY_DN74908_c7_g4	CAT1	582.965	MAPK signaling pathway - plant	0.9
TRINITY_DN73240_c0_g3	-	565.726	Plant hormone signal transduction	0.9
TRINITY_DN70996_c0_g1	NLP2	560.973	Plant hormone signal transduction; MAPK signaling pathway-plant	0.85
TRINITY_DN82655_c0_g1	-	543.694	Plant hormone signal transduction	0.89
TRINITY_DN69789_c0_g2	BEH3	524.134	Plant hormone signal transduction	0.86
TRINITY_DN85058_c0_g2	ARF19	518.719	Plant hormone signal transduction	0.88
TRINITY_DN61367_c0_g1	MPK9	501.359	MAPK signaling pathway - plant	0.89
TRINITY_DN56647_c0_g7	FLS2	500.435	MAPK signaling pathway - plant	0.88
TRINITY_DN81403_c0_g1	JAR1	495.141	Plant hormone signal transduction	0.89
TRINITY_DN55388_c0_g1	ARF5	495.107	Plant hormone signal transduction	0.87
TRINITY_DN70993_c0_g3	-	481.909	Plant hormone signal transduction; MAPK signaling pathway-plant	0.84
TRINITY_DN61392_c0_g1	TIR1	457.974	Plant hormone signal transduction	0.87
TRINITY_DN83443_c1_g1	-	443.492	Plant hormone signal transduction	0.86
TRINITY_DN63300_c0_g4	SAUR23	440.77	Plant hormone signal transduction	0.83
TRINITY_DN82814_c0_g3	-	438.648	Plant hormone signal transduction	0.85
TRINITY_DN84422_c0_g1	EIN2	433.088	Plant hormone signal transduction; MAPK signaling pathway-plant	0.82
TRINITY_DN66523_c0_g3	IAA16	426.398	Plant hormone signal transduction	0.83
TRINITY_DN86124_c0_g1	-	417.524	Plant hormone signal transduction	0.84
TRINITY_DN70198_c0_g2	SAUR24	410.589	Plant hormone signal transduction	0.84
TRINITY_DN65688_c0_g1	SAPK7	389.32	Plant hormone signal transduction; MAPK signaling pathway-plant	0.83
TRINITY_DN56647_c0_g3	FLS2	377.58	MAPK signaling pathway - plant	0.83
TRINITY_DN69273_c0_g3	ARF19	362.229	Plant hormone signal transduction	0.78
TRINITY_DN64534_c0_g1	SAUR50	357.288	Plant hormone signal transduction	0.83
TRINITY_DN72321_c0_g1	LAX5	341.747	Plant hormone signal transduction	0.82
TRINITY_DN82463_c0_g1	ASK6	338.952	Plant hormone signal transduction	0.8
TRINITY_DN79752_c0_g2	FRL3	334.324	MAPK signaling pathway - plant	0.82
TRINITY_DN80410_c0_g1	NTF3	317.34	MAPK signaling pathway - plant	0.81
TRINITY_DN87482_c1_g2	CTR1	309.531	Plant hormone signal transduction; MAPK signaling pathway-plant	0.78
TRINITY_DN81724_c0_g1	GH3.5	293.908	Plant hormone signal transduction	0.78
TRINITY_DN67875_c1_g6	ARF4	280.887	Plant hormone signal transduction	0.79
TRINITY_DN78357_c0_g3	TGA21	270.314	Plant hormone signal transduction	0.77
TRINITY_DN83719_c0_g1	SAUR23	269.211	Plant hormone signal transduction	0.75
TRINITY_DN59032_c0_g1	SAUR22	269.051	Plant hormone signal transduction	0.73
TRINITY_DN73566_c1_g2	IAA8	266.529	Plant hormone signal transduction	0.77
TRINITY_DN68997_c0_g3	TGA2.2	265.374	Plant hormone signal transduction	0.78
TRINITY_DN73472_c0_g1	Os04g0395600	262.803	Plant hormone signal transduction	0.74
TRINITY_DN60282_c2_g2	SRK2E	249.423	Plant hormone signal transduction; MAPK signaling pathway-plant	0.73
TRINITY_DN70198_c0_g4	SAUR24	249.307	Plant hormone signal transduction	0.75
TRINITY_DN68938_c0_g1	ARF1	246.554	Plant hormone signal transduction	0.76
TRINITY_DN71169_c0_g1	-	244.87	Plant hormone signal transduction	0.72
TRINITY_DN86847_c1_g1	TIR1	239.659	Plant hormone signal transduction	0.76
TRINITY_DN67988_c0_g1	-	199.514	Plant hormone signal transduction	0.71
TRINITY_DN73566_c1_g1	IAA9	196.798	Plant hormone signal transduction	0.72
TRINITY_DN58366_c0_g3	AUX22B	190.249	Plant hormone signal transduction	0.7
TRINITY_DN67556_c0_g1	TGA1A	172.284	Plant hormone signal transduction	0.66
TRINITY_DN87630_c1_g1	SAUR21	165.83	Plant hormone signal transduction	0.65
TRINITY_DN74870_c0_g1	SCL23	162.085	Plant hormone signal transduction	0.69
TRINITY_DN71992_c0_g2	SAUR67	149.968	Plant hormone signal transduction	0.66
TRINITY_DN86489_c1_g1	ARF4	129.742	Plant hormone signal transduction	0.63
TRINITY_DN71386_c0_g2	MPK16	129.064	MAPK signaling pathway - plant	0.63
TRINITY_DN71989_c0_g1	TIFY6B	108.643	Plant hormone signal transduction	0.62
TRINITY_DN62523_c0_g1	ARG7	74.5986	Plant hormone signal transduction	0.49
TRINITY_DN71699_c0_g1	SAPK3	71.0745	Plant hormone signal transduction; MAPK signaling pathway-plant	0.51
TRINITY_DN58113_c0_g1	IAA27	66.1067	Plant hormone signal transduction	0.51

## Sheet: red
Gene_ID	Gene_Name	Connectivity	Pathway_Name	KME_MM
TRINITY_DN58873_c0_g2	-	535.379	MAPK signaling pathway - plant	0.97
TRINITY_DN69663_c0_g2	WRKY24	495.414	MAPK signaling pathway - plant	0.95
TRINITY_DN54031_c0_g1	CML45	491.469	MAPK signaling pathway - plant	0.95
TRINITY_DN72632_c0_g1	MKK5	486.643	MAPK signaling pathway - plant	0.95
TRINITY_DN73774_c0_g1	WRKY51	456.559	MAPK signaling pathway - plant	0.93
TRINITY_DN83957_c1_g1	WRKY40	435.328	MAPK signaling pathway - plant	0.94
TRINITY_DN84839_c1_g1	MPK16	421.322	MAPK signaling pathway - plant	0.93
TRINITY_DN84770_c0_g3	CML30	402.711	MAPK signaling pathway - plant	0.91
TRINITY_DN72069_c1_g1	WRKY7	374.867	MAPK signaling pathway - plant	0.88
TRINITY_DN82895_c1_g2	MPK3	368.897	MAPK signaling pathway - plant	0.91
TRINITY_DN58754_c0_g1	WRKY51	360.422	MAPK signaling pathway - plant	0.89
TRINITY_DN61836_c0_g1	CML30	334.795	MAPK signaling pathway - plant	0.87
TRINITY_DN84716_c0_g2	MPK1	291.804	MAPK signaling pathway - plant	0.82
TRINITY_DN71962_c0_g1	BAK1	288.483	MAPK signaling pathway - plant	0.87
TRINITY_DN59807_c0_g3	CALM	257.21	MAPK signaling pathway - plant	0.82
TRINITY_DN63425_c0_g1	BAK1	256.695	MAPK signaling pathway - plant	0.85
TRINITY_DN84889_c1_g1	BAK1	245.019	MAPK signaling pathway - plant	0.81
TRINITY_DN77352_c0_g1	WRKY51	238.694	MAPK signaling pathway - plant	0.82
TRINITY_DN87857_c2_g1	CAM-1	236.583	MAPK signaling pathway - plant	0.79
TRINITY_DN58214_c0_g1	CML45	228.835	MAPK signaling pathway - plant	0.78
TRINITY_DN87857_c2_g3	CAM-1	228.323	MAPK signaling pathway - plant	0.83
TRINITY_DN72183_c0_g1	BAK1	213.426	Plant hormone signal transduction; MAPK signaling pathway-plant	0.79
TRINITY_DN76479_c0_g2	EIN3	205.269	Plant hormone signal transduction; MAPK signaling pathway-plant	0.81
TRINITY_DN72183_c0_g2	BAK1	198.646	Plant hormone signal transduction; MAPK signaling pathway-plant	0.81
TRINITY_DN72179_c0_g1	BAK1	195.43	Plant hormone signal transduction; MAPK signaling pathway-plant	0.81
TRINITY_DN59652_c0_g1	MEKK1	188.499	MAPK signaling pathway - plant	0.8
TRINITY_DN85933_c0_g2	CAM-1	188.159	MAPK signaling pathway - plant	0.77
TRINITY_DN77520_c0_g2	BAK1	186.319	MAPK signaling pathway - plant	0.78
TRINITY_DN59075_c0_g4	SERK2	174.073	MAPK signaling pathway - plant	0.76
TRINITY_DN81376_c0_g2	WRKY24	160.76	MAPK signaling pathway - plant	0.73
TRINITY_DN68239_c0_g1	WRKY15	152.521	MAPK signaling pathway - plant	0.76
TRINITY_DN61836_c0_g2	CML30	143.516	MAPK signaling pathway - plant	0.68
TRINITY_DN66094_c0_g4	BAK1	136.85	Plant hormone signal transduction; MAPK signaling pathway-plant	0.69
TRINITY_DN87248_c1_g1	BAK1	128.349	Plant hormone signal transduction; MAPK signaling pathway-plant	0.67
TRINITY_DN62723_c0_g2	BAK1	128.181	Plant hormone signal transduction; MAPK signaling pathway-plant	0.68
TRINITY_DN81252_c2_g1	BAK1	100.561	Plant hormone signal transduction; MAPK signaling pathway-plant	0.68
TRINITY_DN66545_c0_g4	WRKY75	98.1824	MAPK signaling pathway - plant	0.71
TRINITY_DN82407_c0_g3	MPK4	87.0291	MAPK signaling pathway - plant	0.66
TRINITY_DN82236_c2_g1	WRKY21	80.5558	MAPK signaling pathway - plant	0.67
TRINITY_DN72834_c0_g1	AUX22D	56.896	Plant hormone signal transduction	0.61
