# Supplementary material for: Comparative Physiological and Transcriptome Analysis of <em>Crossostephium chinense</em> Reveals Its Molecular Mechanisms of Salt Tolerance
Source: Preprints.org preprint supplement (doi:10.20944/preprints202310.0151.v1), 2023-10-03
Supplement: Supplementary file 7 [file Table S8.xlsx]

## Sheet: yellow
fromNode	KEGG_Pathway	GO_Term	toNode	KEGG_Pathway	GO_Term	weight	direction	fromAltName	toAltName
TRINITY_DN59710_c0_g5	-	-	TRINITY_DN76520_c0_g1	bna04075(Plant hormone signal transduction)	GO:0003700(DNA binding transcription factor activity);GO:0005634(nucleus);GO:0006355(regulation of transcription, DNA-templated);GO:0043565(sequence-specific DNA binding)	0.29977	undirected	-	CIGR1
TRINITY_DN63420_c0_g1	-	-	TRINITY_DN76520_c0_g1	bna04075(Plant hormone signal transduction)	GO:0003700(DNA binding transcription factor activity);GO:0005634(nucleus);GO:0006355(regulation of transcription, DNA-templated);GO:0043566(sequence-specific DNA binding)	0.291283	undirected	-	CIGR1
TRINITY_DN72154_c1_g1	-	-	TRINITY_DN76520_c0_g1	bna04075(Plant hormone signal transduction)	GO:0003700(DNA binding transcription factor activity);GO:0005634(nucleus);GO:0006355(regulation of transcription, DNA-templated);GO:0043567(sequence-specific DNA binding)	0.27109	undirected	-	CIGR1
TRINITY_DN76703_c0_g2	-	-	TRINITY_DN76520_c0_g1	bna04075(Plant hormone signal transduction)	GO:0003700(DNA binding transcription factor activity);GO:0005634(nucleus);GO:0006355(regulation of transcription, DNA-templated);GO:0043568(sequence-specific DNA binding)	0.259071	undirected	-	CIGR1
TRINITY_DN80292_c1_g2	-	-	TRINITY_DN76520_c0_g1	bna04075(Plant hormone signal transduction)	GO:0003700(DNA binding transcription factor activity);GO:0005634(nucleus);GO:0006355(regulation of transcription, DNA-templated);GO:0043569(sequence-specific DNA binding)	0.246794	undirected	-	CIGR1
TRINITY_DN64164_c0_g4	-	-	TRINITY_DN76520_c0_g1	bna04075(Plant hormone signal transduction)	GO:0003700(DNA binding transcription factor activity);GO:0005634(nucleus);GO:0006355(regulation of transcription, DNA-templated);GO:0043570(sequence-specific DNA binding)	0.245258	undirected	-	CIGR1
TRINITY_DN82093_c1_g3	-	-	TRINITY_DN76520_c0_g1	bna04075(Plant hormone signal transduction)	GO:0003700(DNA binding transcription factor activity);GO:0005634(nucleus);GO:0006355(regulation of transcription, DNA-templated);GO:0043571(sequence-specific DNA binding)	0.243095	undirected	-	CIGR1
TRINITY_DN86060_c0_g1	-	-	TRINITY_DN76520_c0_g1	bna04075(Plant hormone signal transduction)	GO:0003700(DNA binding transcription factor activity);GO:0005634(nucleus);GO:0006355(regulation of transcription, DNA-templated);GO:0043572(sequence-specific DNA binding)	0.242418	undirected	-	CIGR1
TRINITY_DN75467_c0_g1	-	-	TRINITY_DN76520_c0_g1	bna04075(Plant hormone signal transduction)	GO:0003700(DNA binding transcription factor activity);GO:0005634(nucleus);GO:0006355(regulation of transcription, DNA-templated);GO:0043573(sequence-specific DNA binding)	0.238283	undirected	-	CIGR1
TRINITY_DN74945_c0_g3	NA(NA)	GO:0009813(flavonoid biosynthetic process);GO:0043231(intracellular membrane-bounded organelle);GO:0052696(flavonoid glucuronidation);GO:0080043(quercetin 3-O-glucosyltransferase activity);GO:0080044(quercetin 7-O-glucosyltransferase activity)	TRINITY_DN76520_c0_g1	bna04075(Plant hormone signal transduction)	GO:0003700(DNA binding transcription factor activity);GO:0005634(nucleus);GO:0006355(regulation of transcription, DNA-templated);GO:0043574(sequence-specific DNA binding)	0.229984	undirected	GT2	CIGR1
TRINITY_DN87913_c0_g1	-	-	TRINITY_DN76520_c0_g1	bna04075(Plant hormone signal transduction)	GO:0003700(DNA binding transcription factor activity);GO:0005634(nucleus);GO:0006355(regulation of transcription, DNA-templated);GO:0043575(sequence-specific DNA binding)	0.229963	undirected	-	CIGR1
TRINITY_DN86664_c1_g1	han04120(Ubiquitin mediated proteolysis)	GO:0004839(ubiquitin activating enzyme activity);GO:0004842(ubiquitin-protein transferase activity);GO:0005634(nucleus);GO:0005829(cytosol);GO:0019941(modification-dependent protein catabolic process)	TRINITY_DN76520_c0_g1	bna04075(Plant hormone signal transduction)	GO:0003700(DNA binding transcription factor activity);GO:0005634(nucleus);GO:0006355(regulation of transcription, DNA-templated);GO:0043576(sequence-specific DNA binding)	0.21951	undirected	UBA1	CIGR1
TRINITY_DN56829_c0_g4	han02010(ABC transporters)	GO:0000325(plant-type vacuole);GO:0005524(ATP binding);GO:0005773(vacuole);GO:0005774(vacuolar membrane);GO:0005794(Golgi apparatus);GO:0005886(plasma membrane);GO:0006855(drug transmembrane transport);GO:0008517(folic acid transmembrane transporter activity);GO:0008559(xenobiotic transmembrane transporting ATPase activity);GO:0009414(response to water deprivation);GO:0009506(plasmodesma);GO:0009…	TRINITY_DN76520_c0_g1	bna04075(Plant hormone signal transduction)	GO:0003700(DNA binding transcription factor activity);GO:0005634(nucleus);GO:0006355(regulation of transcription, DNA-templated);GO:0043577(sequence-specific DNA binding)	0.218515	undirected	ABCC4	CIGR1
TRINITY_DN62747_c0_g1	NA(NA)	GO:0003677(DNA binding);GO:0003700(DNA binding transcription factor activity);GO:0003713(transcription coactivator activity);GO:0005622(intracellular);GO:0005634(nucleus);GO:0005730(nucleolus);GO:0005737(cytoplasm);GO:0006351(transcription, DNA-templated);GO:0009408(response to heat);GO:0009414(response to water deprivation);GO:0009723(response to ethylene);GO:0009737(response to abscisic acid);G…	TRINITY_DN76520_c0_g1	bna04075(Plant hormone signal transduction)	GO:0003700(DNA binding transcription factor activity);GO:0005634(nucleus);GO:0006355(regulation of transcription, DNA-templated);GO:0043578(sequence-specific DNA binding)	0.217468	undirected	MBF1C	CIGR1
TRINITY_DN87588_c0_g2	-	-	TRINITY_DN76520_c0_g1	bna04075(Plant hormone signal transduction)	GO:0003700(DNA binding transcription factor activity);GO:0005634(nucleus);GO:0006355(regulation of transcription, DNA-templated);GO:0043579(sequence-specific DNA binding)	0.215727	undirected	-	CIGR1
TRINITY_DN64303_c0_g2	-	-	TRINITY_DN76520_c0_g1	bna04075(Plant hormone signal transduction)	GO:0003700(DNA binding transcription factor activity);GO:0005634(nucleus);GO:0006355(regulation of transcription, DNA-templated);GO:0043580(sequence-specific DNA binding)	0.212767	undirected	-	CIGR1
TRINITY_DN75946_c0_g1	-	-	TRINITY_DN76520_c0_g1	bna04075(Plant hormone signal transduction)	GO:0003700(DNA binding transcription factor activity);GO:0005634(nucleus);GO:0006355(regulation of transcription, DNA-templated);GO:0043581(sequence-specific DNA binding)	0.20884	undirected	-	CIGR1
TRINITY_DN61898_c1_g1	-	-	TRINITY_DN76520_c0_g1	bna04075(Plant hormone signal transduction)	GO:0003700(DNA binding transcription factor activity);GO:0005634(nucleus);GO:0006355(regulation of transcription, DNA-templated);GO:0043582(sequence-specific DNA binding)	0.208739	undirected	-	CIGR1
TRINITY_DN65626_c1_g1	-	-	TRINITY_DN76520_c0_g1	bna04075(Plant hormone signal transduction)	GO:0003700(DNA binding transcription factor activity);GO:0005634(nucleus);GO:0006355(regulation of transcription, DNA-templated);GO:0043583(sequence-specific DNA binding)	0.20748	undirected	-	CIGR1
TRINITY_DN84481_c0_g2	han00500(Starch and sucrose metabolism)	GO:0004373(glycogen (starch) synthase activity);GO:0005515(protein binding);GO:0005982(starch metabolic process);GO:0009011(starch synthase activity);GO:0009501(amyloplast);GO:0009507(chloroplast);GO:0016757(transferase activity, transferring glycosyl groups);GO:0019252(starch biosynthetic process);GO:0033201(alpha-1,4-glucan synthase activity)	TRINITY_DN76520_c0_g1	bna04075(Plant hormone signal transduction)	GO:0003700(DNA binding transcription factor activity);GO:0005634(nucleus);GO:0006355(regulation of transcription, DNA-templated);GO:0043584(sequence-specific DNA binding)	0.20677	undirected	TAF1	CIGR1
TRINITY_DN87949_c0_g1	zju04145(Phagosome)	GO:0004197(cysteine-type endopeptidase activity);GO:0005615(extracellular space);GO:0005764(lysosome);GO:0051603(proteolysis involved in cellular protein catabolic process)	TRINITY_DN86528_c1_g1	brp04075(Plant hormone signal transduction)	GO:0003700(DNA binding transcription factor activity);GO:0005634(nucleus);GO:0006355(regulation of transcription, DNA-templated);GO:0043565(sequence-specific DNA binding)	0.17853	undirected	OsI_14861	PAT1
TRINITY_DN84854_c0_g3	-	-	TRINITY_DN86528_c1_g1	brp04075(Plant hormone signal transduction)	GO:0003700(DNA binding transcription factor activity);GO:0005634(nucleus);GO:0006355(regulation of transcription, DNA-templated);GO:0043566(sequence-specific DNA binding)	0.15872	undirected	-	PAT1
TRINITY_DN77934_c0_g3	-	-	TRINITY_DN86528_c1_g1	brp04075(Plant hormone signal transduction)	GO:0003700(DNA binding transcription factor activity);GO:0005634(nucleus);GO:0006355(regulation of transcription, DNA-templated);GO:0043567(sequence-specific DNA binding)	0.157522	undirected	-	PAT1
TRINITY_DN59195_c0_g3	han00908(Zeatin biosynthesis)	GO:0009813(flavonoid biosynthetic process);GO:0043231(intracellular membrane-bounded organelle);GO:0052696(flavonoid glucuronidation);GO:0080043(quercetin 3-O-glucosyltransferase activity);GO:0080044(quercetin 7-O-glucosyltransferase activity)	TRINITY_DN86528_c1_g1	brp04075(Plant hormone signal transduction)	GO:0003700(DNA binding transcription factor activity);GO:0005634(nucleus);GO:0006355(regulation of transcription, DNA-templated);GO:0043568(sequence-specific DNA binding)	0.154613	undirected	UGT76C4	PAT1
TRINITY_DN84481_c0_g2	han03022(Basal transcription factors)	GO:0003677(DNA binding);GO:0004402(histone acetyltransferase activity);GO:0005634(nucleus);GO:0005669(transcription factor TFIID complex);GO:0009294(DNA mediated transformation);GO:0017025(TBP-class protein binding);GO:0043565(sequence-specific DNA binding);GO:0045944(positive regulation of transcription by RNA polymerase II)	TRINITY_DN86528_c1_g1	brp04075(Plant hormone signal transduction)	GO:0003700(DNA binding transcription factor activity);GO:0005634(nucleus);GO:0006355(regulation of transcription, DNA-templated);GO:0043569(sequence-specific DNA binding)	0.153921	undirected	TAF1	PAT1
TRINITY_DN65102_c0_g1	han00500(Starch and sucrose metabolism)	GO:0003825(alpha,alpha-trehalose-phosphate synthase (UDP-forming) activity);GO:0004805(trehalose-phosphatase activity);GO:0005634(nucleus);GO:0005829(cytosol);GO:0005992(trehalose biosynthetic process);GO:0016757(transferase activity, transferring glycosyl groups);GO:0016791(phosphatase activity);GO:0070413(trehalose metabolism in response to stress)	TRINITY_DN86528_c1_g1	brp04075(Plant hormone signal transduction)	GO:0003700(DNA binding transcription factor activity);GO:0005634(nucleus);GO:0006355(regulation of transcription, DNA-templated);GO:0043570(sequence-specific DNA binding)	0.1521	undirected	TPS7	PAT1
TRINITY_DN76396_c0_g1	NA(NA)	GO:0005783(endoplasmic reticulum);GO:0005887(integral component of plasma membrane);GO:0019829(cation-transporting ATPase activity)	TRINITY_DN86528_c1_g1	brp04075(Plant hormone signal transduction)	GO:0003700(DNA binding transcription factor activity);GO:0005634(nucleus);GO:0006355(regulation of transcription, DNA-templated);GO:0043571(sequence-specific DNA binding)	0.150995	undirected	ECA4	PAT1
TRINITY_DN72669_c0_g2	-	-	TRINITY_DN86528_c1_g1	brp04075(Plant hormone signal transduction)	GO:0003700(DNA binding transcription factor activity);GO:0005634(nucleus);GO:0006355(regulation of transcription, DNA-templated);GO:0043572(sequence-specific DNA binding)	0.149234	undirected	-	PAT1
TRINITY_DN71859_c0_g4	NA(NA)	GO:0005515(protein binding);GO:0005634(nucleus);GO:0005730(nucleolus);GO:0005737(cytoplasm);GO:0005829(cytosol);GO:0006281(DNA repair);GO:0006351(transcription, DNA-templated);GO:0006355(regulation of transcription, DNA-templated);GO:0009826(unidimensional cell growth);GO:0009908(flower development);GO:0009965(leaf morphogenesis);GO:0010090(trichome morphogenesis);GO:0010224(response to UV-B);GO:…	TRINITY_DN86528_c1_g1	brp04075(Plant hormone signal transduction)	GO:0003700(DNA binding transcription factor activity);GO:0005634(nucleus);GO:0006355(regulation of transcription, DNA-templated);GO:0043573(sequence-specific DNA binding)	0.147424	undirected	MSI4	PAT1
TRINITY_DN63420_c0_g1	-	-	TRINITY_DN86528_c1_g1	brp04075(Plant hormone signal transduction)	GO:0003700(DNA binding transcription factor activity);GO:0005634(nucleus);GO:0006355(regulation of transcription, DNA-templated);GO:0043574(sequence-specific DNA binding)	0.14478	undirected	-	PAT1
TRINITY_DN76162_c0_g8	-	-	TRINITY_DN86528_c1_g1	brp04075(Plant hormone signal transduction)	GO:0003700(DNA binding transcription factor activity);GO:0005634(nucleus);GO:0006355(regulation of transcription, DNA-templated);GO:0043575(sequence-specific DNA binding)	0.144675	undirected	-	PAT1
TRINITY_DN77117_c1_g7	-	-	TRINITY_DN86528_c1_g1	brp04075(Plant hormone signal transduction)	GO:0003700(DNA binding transcription factor activity);GO:0005634(nucleus);GO:0006355(regulation of transcription, DNA-templated);GO:0043576(sequence-specific DNA binding)	0.142799	undirected	-	PAT1
TRINITY_DN64164_c0_g4	-	-	TRINITY_DN86528_c1_g1	brp04075(Plant hormone signal transduction)	GO:0003700(DNA binding transcription factor activity);GO:0005634(nucleus);GO:0006355(regulation of transcription, DNA-templated);GO:0043577(sequence-specific DNA binding)	0.140552	undirected	-	PAT1
TRINITY_DN85698_c0_g3	-	-	TRINITY_DN86528_c1_g1	brp04075(Plant hormone signal transduction)	GO:0003700(DNA binding transcription factor activity);GO:0005634(nucleus);GO:0006355(regulation of transcription, DNA-templated);GO:0043578(sequence-specific DNA binding)	0.140021	undirected	-	PAT1
TRINITY_DN81405_c0_g4	NA(NA)	GO:0005886(plasma membrane);GO:0009507(chloroplast);GO:0009706(chloroplast inner membrane);GO:0009941(chloroplast envelope);GO:0016491(oxidoreductase activity)	TRINITY_DN86528_c1_g1	brp04075(Plant hormone signal transduction)	GO:0003700(DNA binding transcription factor activity);GO:0005634(nucleus);GO:0006355(regulation of transcription, DNA-templated);GO:0043579(sequence-specific DNA binding)	0.137876	undirected	TIC32	PAT1
TRINITY_DN57801_c2_g3	-	-	TRINITY_DN86528_c1_g1	brp04075(Plant hormone signal transduction)	GO:0003700(DNA binding transcription factor activity);GO:0005634(nucleus);GO:0006355(regulation of transcription, DNA-templated);GO:0043580(sequence-specific DNA binding)	0.135956	undirected	-	PAT1
TRINITY_DN87640_c0_g1	-	GO:0005215(transporter activity);GO:0005773(vacuole);GO:0006810(transport);GO:0010008(endosome membrane);GO:0015031(protein transport);GO:0016021(integral component of membrane)	TRINITY_DN86528_c1_g1	brp04075(Plant hormone signal transduction)	GO:0003700(DNA binding transcription factor activity);GO:0005634(nucleus);GO:0006355(regulation of transcription, DNA-templated);GO:0043581(sequence-specific DNA binding)	0.131221	undirected	At1g32410	PAT1
TRINITY_DN76703_c0_g2	-	-	TRINITY_DN86528_c1_g1	brp04075(Plant hormone signal transduction)	GO:0003700(DNA binding transcription factor activity);GO:0005634(nucleus);GO:0006355(regulation of transcription, DNA-templated);GO:0043582(sequence-specific DNA binding)	0.130855	undirected	-	PAT1
TRINITY_DN75500_c0_g4	-	-	TRINITY_DN86528_c1_g1	brp04075(Plant hormone signal transduction)	GO:0003700(DNA binding transcription factor activity);GO:0005634(nucleus);GO:0006355(regulation of transcription, DNA-templated);GO:0043583(sequence-specific DNA binding)	0.126586	undirected	-	PAT1
TRINITY_DN83872_c0_g1	-	-	TRINITY_DN86528_c1_g1	brp04075(Plant hormone signal transduction)	GO:0003700(DNA binding transcription factor activity);GO:0005634(nucleus);GO:0006355(regulation of transcription, DNA-templated);GO:0043584(sequence-specific DNA binding)	0.126581	undirected	-	PAT1
TRINITY_DN64900_c0_g1	-	-	TRINITY_DN74476_c0_g5	han04075(Plant hormone signal transduction);han04712(Circadian rhythm - plant)	-	0.207161	undirected	-	-
TRINITY_DN56050_c0_g1	egu00010(Glycolysis / Gluconeogenesis);egu00030(Pentose phosphate pathway);egu00051(Fructose and mannose metabolism);egu00052(Galactose metabolism);egu03018(RNA degradation)	GO:0003872(6-phosphofructokinase activity);GO:0005524(ATP binding);GO:0005737(cytoplasm);GO:0005829(cytosol);GO:0005945(6-phosphofructokinase complex);GO:0006002(fructose 6-phosphate metabolic process);GO:0006096(glycolytic process);GO:0046872(metal ion binding)	TRINITY_DN74476_c0_g5	han04075(Plant hormone signal transduction);han04713(Circadian rhythm - plant)	-	0.20272	undirected	PFK2	-
TRINITY_DN67695_c0_g2	-	-	TRINITY_DN74476_c0_g5	han04075(Plant hormone signal transduction);han04714(Circadian rhythm - plant)	-	0.188803	undirected	-	-
TRINITY_DN64164_c0_g4	-	-	TRINITY_DN74476_c0_g5	han04075(Plant hormone signal transduction);han04715(Circadian rhythm - plant)	-	0.183847	undirected	-	-
TRINITY_DN72669_c0_g2	-	-	TRINITY_DN74476_c0_g5	han04075(Plant hormone signal transduction);han04716(Circadian rhythm - plant)	-	0.179318	undirected	-	-
TRINITY_DN63833_c0_g6	NA(NA)	GO:0000981(RNA polymerase II transcription factor activity, sequence-specific DNA binding);GO:0001135(transcription factor activity, RNA polymerase II transcription factor recruiting);GO:0003677(DNA binding);GO:0003700(DNA binding transcription factor activity);GO:0005515(protein binding);GO:0005634(nucleus);GO:0006351(transcription, DNA-templated);GO:0006355(regulation of transcription, DNA-temp…	TRINITY_DN74476_c0_g5	han04075(Plant hormone signal transduction);han04717(Circadian rhythm - plant)	-	0.170765	undirected	CPC	-
TRINITY_DN62579_c0_g3	-	-	TRINITY_DN74476_c0_g5	han04075(Plant hormone signal transduction);han04718(Circadian rhythm - plant)	-	0.168888	undirected	-	-
TRINITY_DN87255_c0_g1	han04136(Autophagy - other eukaryotes)	GO:0006995(cellular response to nitrogen starvation)	TRINITY_DN74476_c0_g5	han04075(Plant hormone signal transduction);han04719(Circadian rhythm - plant)	-	0.167753	undirected	ATG8F	-
TRINITY_DN82303_c0_g5	-	-	TRINITY_DN74476_c0_g5	han04075(Plant hormone signal transduction);han04720(Circadian rhythm - plant)	-	0.1593	undirected	-	-
TRINITY_DN83872_c0_g1	-	-	TRINITY_DN74476_c0_g5	han04075(Plant hormone signal transduction);han04721(Circadian rhythm - plant)	-	0.156176	undirected	-	-
TRINITY_DN64796_c1_g4	-	-	TRINITY_DN74476_c0_g5	han04075(Plant hormone signal transduction);han04722(Circadian rhythm - plant)	-	0.155666	undirected	-	-
TRINITY_DN80370_c0_g1	-	-	TRINITY_DN74476_c0_g5	han04075(Plant hormone signal transduction);han04723(Circadian rhythm - plant)	-	0.154825	undirected	-	-
TRINITY_DN59308_c0_g1	-	-	TRINITY_DN74476_c0_g5	han04075(Plant hormone signal transduction);han04724(Circadian rhythm - plant)	-	0.154527	undirected	-	-
TRINITY_DN77333_c1_g2	-	-	TRINITY_DN74476_c0_g5	han04075(Plant hormone signal transduction);han04725(Circadian rhythm - plant)	-	0.150509	undirected	-	-
TRINITY_DN84481_c0_g2	han03022(Basal transcription factors)	GO:0003677(DNA binding);GO:0004402(histone acetyltransferase activity);GO:0005634(nucleus);GO:0005669(transcription factor TFIID complex);GO:0009294(DNA mediated transformation);GO:0017025(TBP-class protein binding);GO:0043565(sequence-specific DNA binding);GO:0045944(positive regulation of transcription by RNA polymerase II)	TRINITY_DN74476_c0_g5	han04075(Plant hormone signal transduction);han04726(Circadian rhythm - plant)	-	0.149482	undirected	TAF1	-
TRINITY_DN63420_c0_g1	-	-	TRINITY_DN74476_c0_g5	han04075(Plant hormone signal transduction);han04727(Circadian rhythm - plant)	-	0.147202	undirected	-	-
TRINITY_DN76486_c2_g1	han03018(RNA degradation)	GO:0000290(deadenylation-dependent decapping of nuclear-transcribed mRNA);GO:0005737(cytoplasm);GO:0050072(m7G(5')pppN diphosphatase activity)	TRINITY_DN74476_c0_g5	han04075(Plant hormone signal transduction);han04728(Circadian rhythm - plant)	-	0.147094	undirected	DCP2	-
TRINITY_DN70775_c1_g5	han00740(Riboflavin metabolism)	GO:0003993(acid phosphatase activity);GO:0004722(protein serine/threonine phosphatase activity);GO:0005576(extracellular region);GO:0005773(vacuole);GO:0016311(dephosphorylation);GO:0046872(metal ion binding)	TRINITY_DN74476_c0_g5	han04075(Plant hormone signal transduction);han04729(Circadian rhythm - plant)	-	0.14418	undirected	PAP3	-
TRINITY_DN68783_c1_g2	NA(NA)	GO:0004843(thiol-dependent ubiquitin-specific protease activity);GO:0005516(calmodulin binding);GO:0005634(nucleus);GO:0006511(ubiquitin-dependent protein catabolic process);GO:0009506(plasmodesma);GO:0016579(protein deubiquitination);GO:0036459(thiol-dependent ubiquitinyl hydrolase activity)	TRINITY_DN74476_c0_g5	han04075(Plant hormone signal transduction);han04730(Circadian rhythm - plant)	-	0.143592	undirected	UBP6	-
TRINITY_DN70499_c0_g3	han00965(Betalain biosynthesis)	GO:0006725(cellular aromatic compound metabolic process);GO:0046566(DOPA dioxygenase activity);GO:0055114(oxidation-reduction process)	TRINITY_DN74476_c0_g5	han04075(Plant hormone signal transduction);han04731(Circadian rhythm - plant)	-	0.142589	undirected	DODA	-
TRINITY_DN86060_c0_g1	-	-	TRINITY_DN77201_c0_g1	han04016(MAPK signaling pathway - plant);han04075(Plant hormone signal transduction)	GO:0004674(protein serine/threonine kinase activity);GO:0005634(nucleus);GO:0005737(cytoplasm);GO:0006468(protein phosphorylation);GO:0035556(intracellular signal transduction)	0.212129	undirected	-	SRK2D
TRINITY_DN59710_c0_g5	-	-	TRINITY_DN77201_c0_g1	han04016(MAPK signaling pathway - plant);han04076(Plant hormone signal transduction)	GO:0004674(protein serine/threonine kinase activity);GO:0005634(nucleus);GO:0005737(cytoplasm);GO:0006468(protein phosphorylation);GO:0035557(intracellular signal transduction)	0.205778	undirected	-	SRK2D
TRINITY_DN63420_c0_g1	-	-	TRINITY_DN77201_c0_g1	han04016(MAPK signaling pathway - plant);han04077(Plant hormone signal transduction)	GO:0004674(protein serine/threonine kinase activity);GO:0005634(nucleus);GO:0005737(cytoplasm);GO:0006468(protein phosphorylation);GO:0035558(intracellular signal transduction)	0.196115	undirected	-	SRK2D
TRINITY_DN72154_c1_g1	-	-	TRINITY_DN77201_c0_g1	han04016(MAPK signaling pathway - plant);han04078(Plant hormone signal transduction)	GO:0004674(protein serine/threonine kinase activity);GO:0005634(nucleus);GO:0005737(cytoplasm);GO:0006468(protein phosphorylation);GO:0035559(intracellular signal transduction)	0.194018	undirected	-	SRK2D
TRINITY_DN64810_c0_g1	NA(NA)	GO:0003723(RNA binding);GO:0004525(ribonuclease III activity);GO:0005634(nucleus);GO:0005737(cytoplasm);GO:0016442(RISC complex);GO:0030422(production of siRNA involved in RNA interference)	TRINITY_DN77201_c0_g1	han04016(MAPK signaling pathway - plant);han04079(Plant hormone signal transduction)	GO:0004674(protein serine/threonine kinase activity);GO:0005634(nucleus);GO:0005737(cytoplasm);GO:0006468(protein phosphorylation);GO:0035560(intracellular signal transduction)	0.191523	undirected	At3g03300	SRK2D
TRINITY_DN80679_c0_g2	-	-	TRINITY_DN77201_c0_g1	han04016(MAPK signaling pathway - plant);han04080(Plant hormone signal transduction)	GO:0004674(protein serine/threonine kinase activity);GO:0005634(nucleus);GO:0005737(cytoplasm);GO:0006468(protein phosphorylation);GO:0035561(intracellular signal transduction)	0.191457	undirected	-	SRK2D
TRINITY_DN71859_c0_g4	NA(NA)	GO:0005515(protein binding);GO:0005634(nucleus);GO:0005730(nucleolus);GO:0005737(cytoplasm);GO:0005829(cytosol);GO:0006281(DNA repair);GO:0006351(transcription, DNA-templated);GO:0006355(regulation of transcription, DNA-templated);GO:0009826(unidimensional cell growth);GO:0009908(flower development);GO:0009965(leaf morphogenesis);GO:0010090(trichome morphogenesis);GO:0010224(response to UV-B);GO:…	TRINITY_DN77201_c0_g1	han04016(MAPK signaling pathway - plant);han04081(Plant hormone signal transduction)	GO:0004674(protein serine/threonine kinase activity);GO:0005634(nucleus);GO:0005737(cytoplasm);GO:0006468(protein phosphorylation);GO:0035562(intracellular signal transduction)	0.186792	undirected	MSI4	SRK2D
TRINITY_DN61096_c0_g4	-	-	TRINITY_DN77201_c0_g1	han04016(MAPK signaling pathway - plant);han04082(Plant hormone signal transduction)	GO:0004674(protein serine/threonine kinase activity);GO:0005634(nucleus);GO:0005737(cytoplasm);GO:0006468(protein phosphorylation);GO:0035563(intracellular signal transduction)	0.186185	undirected	-	SRK2D
TRINITY_DN80292_c1_g2	-	-	TRINITY_DN77201_c0_g1	han04016(MAPK signaling pathway - plant);han04083(Plant hormone signal transduction)	GO:0004674(protein serine/threonine kinase activity);GO:0005634(nucleus);GO:0005737(cytoplasm);GO:0006468(protein phosphorylation);GO:0035564(intracellular signal transduction)	0.185438	undirected	-	SRK2D
TRINITY_DN77934_c0_g3	-	-	TRINITY_DN77201_c0_g1	han04016(MAPK signaling pathway - plant);han04084(Plant hormone signal transduction)	GO:0004674(protein serine/threonine kinase activity);GO:0005634(nucleus);GO:0005737(cytoplasm);GO:0006468(protein phosphorylation);GO:0035565(intracellular signal transduction)	0.183086	undirected	-	SRK2D
TRINITY_DN62747_c0_g1	NA(NA)	GO:0003677(DNA binding);GO:0003700(DNA binding transcription factor activity);GO:0003713(transcription coactivator activity);GO:0005622(intracellular);GO:0005634(nucleus);GO:0005730(nucleolus);GO:0005737(cytoplasm);GO:0006351(transcription, DNA-templated);GO:0009408(response to heat);GO:0009414(response to water deprivation);GO:0009723(response to ethylene);GO:0009737(response to abscisic acid);G…	TRINITY_DN77201_c0_g1	han04016(MAPK signaling pathway - plant);han04085(Plant hormone signal transduction)	GO:0004674(protein serine/threonine kinase activity);GO:0005634(nucleus);GO:0005737(cytoplasm);GO:0006468(protein phosphorylation);GO:0035566(intracellular signal transduction)	0.174132	undirected	MBF1C	SRK2D
TRINITY_DN86664_c1_g1	han04120(Ubiquitin mediated proteolysis)	GO:0004839(ubiquitin activating enzyme activity);GO:0004842(ubiquitin-protein transferase activity);GO:0005634(nucleus);GO:0005829(cytosol);GO:0019941(modification-dependent protein catabolic process)	TRINITY_DN77201_c0_g1	han04016(MAPK signaling pathway - plant);han04086(Plant hormone signal transduction)	GO:0004674(protein serine/threonine kinase activity);GO:0005634(nucleus);GO:0005737(cytoplasm);GO:0006468(protein phosphorylation);GO:0035567(intracellular signal transduction)	0.16934	undirected	UBA1	SRK2D
TRINITY_DN61898_c1_g1	-	-	TRINITY_DN77201_c0_g1	han04016(MAPK signaling pathway - plant);han04087(Plant hormone signal transduction)	GO:0004674(protein serine/threonine kinase activity);GO:0005634(nucleus);GO:0005737(cytoplasm);GO:0006468(protein phosphorylation);GO:0035568(intracellular signal transduction)	0.167741	undirected	-	SRK2D
TRINITY_DN76703_c0_g2	-	-	TRINITY_DN77201_c0_g1	han04016(MAPK signaling pathway - plant);han04088(Plant hormone signal transduction)	GO:0004674(protein serine/threonine kinase activity);GO:0005634(nucleus);GO:0005737(cytoplasm);GO:0006468(protein phosphorylation);GO:0035569(intracellular signal transduction)	0.167361	undirected	-	SRK2D
TRINITY_DN87949_c0_g1	zju04145(Phagosome)	GO:0004197(cysteine-type endopeptidase activity);GO:0005615(extracellular space);GO:0005764(lysosome);GO:0051603(proteolysis involved in cellular protein catabolic process)	TRINITY_DN77201_c0_g1	han04016(MAPK signaling pathway - plant);han04089(Plant hormone signal transduction)	GO:0004674(protein serine/threonine kinase activity);GO:0005634(nucleus);GO:0005737(cytoplasm);GO:0006468(protein phosphorylation);GO:0035570(intracellular signal transduction)	0.165648	undirected	OsI_14861	SRK2D
TRINITY_DN78937_c0_g2	-	-	TRINITY_DN77201_c0_g1	han04016(MAPK signaling pathway - plant);han04090(Plant hormone signal transduction)	GO:0004674(protein serine/threonine kinase activity);GO:0005634(nucleus);GO:0005737(cytoplasm);GO:0006468(protein phosphorylation);GO:0035571(intracellular signal transduction)	0.163806	undirected	-	SRK2D
TRINITY_DN87588_c0_g2	-	-	TRINITY_DN77201_c0_g1	han04016(MAPK signaling pathway - plant);han04091(Plant hormone signal transduction)	GO:0004674(protein serine/threonine kinase activity);GO:0005634(nucleus);GO:0005737(cytoplasm);GO:0006468(protein phosphorylation);GO:0035572(intracellular signal transduction)	0.160522	undirected	-	SRK2D
TRINITY_DN84481_c0_g2	han03022(Basal transcription factors)	GO:0003677(DNA binding);GO:0004402(histone acetyltransferase activity);GO:0005634(nucleus);GO:0005669(transcription factor TFIID complex);GO:0009294(DNA mediated transformation);GO:0017025(TBP-class protein binding);GO:0043565(sequence-specific DNA binding);GO:0045944(positive regulation of transcription by RNA polymerase II)	TRINITY_DN77201_c0_g1	han04016(MAPK signaling pathway - plant);han04092(Plant hormone signal transduction)	GO:0004674(protein serine/threonine kinase activity);GO:0005634(nucleus);GO:0005737(cytoplasm);GO:0006468(protein phosphorylation);GO:0035573(intracellular signal transduction)	0.15688	undirected	TAF1	SRK2D
TRINITY_DN85698_c0_g3	-	-	TRINITY_DN77201_c0_g1	han04016(MAPK signaling pathway - plant);han04093(Plant hormone signal transduction)	GO:0004674(protein serine/threonine kinase activity);GO:0005634(nucleus);GO:0005737(cytoplasm);GO:0006468(protein phosphorylation);GO:0035574(intracellular signal transduction)	0.155924	undirected	-	SRK2D
TRINITY_DN82093_c1_g3	-	-	TRINITY_DN77201_c0_g1	han04016(MAPK signaling pathway - plant);han04094(Plant hormone signal transduction)	GO:0004674(protein serine/threonine kinase activity);GO:0005634(nucleus);GO:0005737(cytoplasm);GO:0006468(protein phosphorylation);GO:0035575(intracellular signal transduction)	0.150578	undirected	-	SRK2D
TRINITY_DN75774_c0_g4	-	-	TRINITY_DN67988_c0_g2	han04075(Plant hormone signal transduction)	-	0.21085	undirected	-	-
TRINITY_DN67695_c0_g2	-	-	TRINITY_DN67988_c0_g2	han04075(Plant hormone signal transduction)	-	0.209638	undirected	-	-
TRINITY_DN76763_c2_g4	-	-	TRINITY_DN67988_c0_g2	han04075(Plant hormone signal transduction)	-	0.207185	undirected	-	-
TRINITY_DN60386_c0_g1	-	-	TRINITY_DN67988_c0_g2	han04075(Plant hormone signal transduction)	-	0.205835	undirected	-	-
TRINITY_DN61284_c0_g1	-	GO:0000166(nucleotide binding);GO:0003723(RNA binding);GO:0005634(nucleus);GO:0008150(biological_process)	TRINITY_DN67988_c0_g2	han04075(Plant hormone signal transduction)	-	0.198007	undirected	CID11	-
TRINITY_DN79836_c0_g4	-	-	TRINITY_DN67988_c0_g2	han04075(Plant hormone signal transduction)	-	0.197365	undirected	-	-
TRINITY_DN64796_c1_g4	-	-	TRINITY_DN67988_c0_g2	han04075(Plant hormone signal transduction)	-	0.196289	undirected	-	-
TRINITY_DN85493_c0_g5	han00190(Oxidative phosphorylation)	GO:0005739(mitochondrion)	TRINITY_DN67988_c0_g2	han04075(Plant hormone signal transduction)	-	0.195938	undirected	ATP6	-
TRINITY_DN84420_c0_g2	NA(NA)	GO:0009813(flavonoid biosynthetic process);GO:0043231(intracellular membrane-bounded organelle);GO:0052696(flavonoid glucuronidation);GO:0080043(quercetin 3-O-glucosyltransferase activity);GO:0080044(quercetin 7-O-glucosyltransferase activity)	TRINITY_DN67988_c0_g2	han04075(Plant hormone signal transduction)	-	0.194296	undirected	UGT85C2	-
TRINITY_DN79143_c1_g2	-	-	TRINITY_DN67988_c0_g2	han04075(Plant hormone signal transduction)	-	0.191785	undirected	-	-
TRINITY_DN75201_c0_g7	-	-	TRINITY_DN67988_c0_g2	han04075(Plant hormone signal transduction)	-	0.191175	undirected	-	-
TRINITY_DN85257_c0_g2	-	-	TRINITY_DN67988_c0_g2	han04075(Plant hormone signal transduction)	-	0.188662	undirected	-	-
TRINITY_DN62121_c1_g3	-	-	TRINITY_DN67988_c0_g2	han04075(Plant hormone signal transduction)	-	0.186881	undirected	-	-
TRINITY_DN65930_c0_g3	-	-	TRINITY_DN67988_c0_g2	han04075(Plant hormone signal transduction)	-	0.186757	undirected	-	-
TRINITY_DN58139_c2_g2	-	-	TRINITY_DN67988_c0_g2	han04075(Plant hormone signal transduction)	-	0.178963	undirected	-	-
TRINITY_DN82101_c1_g4	-	-	TRINITY_DN67988_c0_g2	han04075(Plant hormone signal transduction)	-	0.178633	undirected	-	-
TRINITY_DN80585_c0_g7	-	-	TRINITY_DN67988_c0_g2	han04075(Plant hormone signal transduction)	-	0.175803	undirected	-	-
TRINITY_DN77333_c1_g2	-	-	TRINITY_DN67988_c0_g2	han04075(Plant hormone signal transduction)	-	0.172922	undirected	-	-
TRINITY_DN59310_c1_g3	han00500(Starch and sucrose metabolism)	GO:0005634(nucleus);GO:0005829(cytosol);GO:0005886(plasma membrane);GO:0005986(sucrose biosynthetic process);GO:0009506(plasmodesma);GO:0016157(sucrose synthase activity);GO:0016757(transferase activity, transferring glycosyl groups);GO:0046524(sucrose-phosphate synthase activity);GO:0071836(nectar secretion)	TRINITY_DN67988_c0_g2	han04075(Plant hormone signal transduction)	-	0.170929	undirected	SPS1	-
TRINITY_DN70775_c1_g5	han00740(Riboflavin metabolism)	GO:0003993(acid phosphatase activity);GO:0004722(protein serine/threonine phosphatase activity);GO:0005576(extracellular region);GO:0005773(vacuole);GO:0016311(dephosphorylation);GO:0046872(metal ion binding)	TRINITY_DN67988_c0_g2	han04075(Plant hormone signal transduction)	-	0.16972	undirected	PAP3	-

## Sheet: green
fromNode	KEGG_Pathway	GO_Term	toNode	KEGG_Pathway	GO_Term	weight	direction	fromAltName	toAltName
TRINITY_DN63131_c0_g2	-	-	TRINITY_DN78705_c0_g2	han04016(MAPK signaling pathway - plant);han04075(Plant hormone signal transduction)	GO:0004721(phosphoprotein phosphatase activity);GO:0004722(protein serine/threonine phosphatase activity);GO:0005515(protein binding);GO:0005634(nucleus);GO:0005737(cytoplasm);GO:0005829(cytosol);GO:0006470(protein dephosphorylation);GO:0009409(response to cold);GO:0009414(response to water deprivation);GO:0009737(response to abscisic acid);GO:0009738(abscisic acid-activated signaling pathway);GO…	0.196636	undirected	-	PP2CA
TRINITY_DN75269_c0_g1	-	-	TRINITY_DN78705_c0_g2	han04016(MAPK signaling pathway - plant);han04075(Plant hormone signal transduction)	GO:0004721(phosphoprotein phosphatase activity);GO:0004722(protein serine/threonine phosphatase activity);GO:0005515(protein binding);GO:0005634(nucleus);GO:0005737(cytoplasm);GO:0005829(cytosol);GO:0006470(protein dephosphorylation);GO:0009409(response to cold);GO:0009414(response to water deprivation);GO:0009737(response to abscisic acid);GO:0009738(abscisic acid-activated signaling pathway);GO…	0.18765	undirected	-	PP2CA
TRINITY_DN77392_c0_g3	-	-	TRINITY_DN78705_c0_g2	han04016(MAPK signaling pathway - plant);han04075(Plant hormone signal transduction)	GO:0004721(phosphoprotein phosphatase activity);GO:0004722(protein serine/threonine phosphatase activity);GO:0005515(protein binding);GO:0005634(nucleus);GO:0005737(cytoplasm);GO:0005829(cytosol);GO:0006470(protein dephosphorylation);GO:0009409(response to cold);GO:0009414(response to water deprivation);GO:0009737(response to abscisic acid);GO:0009738(abscisic acid-activated signaling pathway);GO…	0.182914	undirected	-	PP2CA
TRINITY_DN63365_c0_g1	-	-	TRINITY_DN78705_c0_g2	han04016(MAPK signaling pathway - plant);han04075(Plant hormone signal transduction)	GO:0004721(phosphoprotein phosphatase activity);GO:0004722(protein serine/threonine phosphatase activity);GO:0005515(protein binding);GO:0005634(nucleus);GO:0005737(cytoplasm);GO:0005829(cytosol);GO:0006470(protein dephosphorylation);GO:0009409(response to cold);GO:0009414(response to water deprivation);GO:0009737(response to abscisic acid);GO:0009738(abscisic acid-activated signaling pathway);GO…	0.180153	undirected	-	PP2CA
TRINITY_DN64920_c1_g4	han00500(Starch and sucrose metabolism)	GO:0005982(starch metabolic process);GO:0005985(sucrose metabolic process);GO:0005986(sucrose biosynthetic process);GO:0008194(UDP-glycosyltransferase activity);GO:0009414(response to water deprivation);GO:0009507(chloroplast);GO:0010431(seed maturation);GO:0010555(response to mannitol);GO:0016157(sucrose synthase activity);GO:0016757(transferase activity, transferring glycosyl groups)	TRINITY_DN78705_c0_g2	han04016(MAPK signaling pathway - plant);han04075(Plant hormone signal transduction)	GO:0004721(phosphoprotein phosphatase activity);GO:0004722(protein serine/threonine phosphatase activity);GO:0005515(protein binding);GO:0005634(nucleus);GO:0005737(cytoplasm);GO:0005829(cytosol);GO:0006470(protein dephosphorylation);GO:0009409(response to cold);GO:0009414(response to water deprivation);GO:0009737(response to abscisic acid);GO:0009738(abscisic acid-activated signaling pathway);GO…	0.175819	undirected	SUS2	PP2CA
TRINITY_DN69631_c0_g1	-	GO:0005634(nucleus);GO:0006970(response to osmotic stress);GO:0009414(response to water deprivation);GO:0009651(response to salt stress);GO:0009737(response to abscisic acid);GO:0009738(abscisic acid-activated signaling pathway);GO:0010029(regulation of seed germination);GO:0010228(vegetative to reproductive phase transition of meristem)	TRINITY_DN78705_c0_g2	han04016(MAPK signaling pathway - plant);han04075(Plant hormone signal transduction)	GO:0004721(phosphoprotein phosphatase activity);GO:0004722(protein serine/threonine phosphatase activity);GO:0005515(protein binding);GO:0005634(nucleus);GO:0005737(cytoplasm);GO:0005829(cytosol);GO:0006470(protein dephosphorylation);GO:0009409(response to cold);GO:0009414(response to water deprivation);GO:0009737(response to abscisic acid);GO:0009738(abscisic acid-activated signaling pathway);GO…	0.168575	undirected	EDL3	PP2CA
TRINITY_DN67524_c0_g1	cic04145(Phagosome)	GO:0003924(GTPase activity);GO:0005200(structural constituent of cytoskeleton);GO:0005515(protein binding);GO:0005525(GTP binding);GO:0005737(cytoplasm);GO:0005794(Golgi apparatus);GO:0005874(microtubule);GO:0007017(microtubule-based process);GO:0009651(response to salt stress);GO:0016020(membrane);GO:0045298(tubulin complex)	TRINITY_DN78705_c0_g2	han04016(MAPK signaling pathway - plant);han04075(Plant hormone signal transduction)	GO:0004721(phosphoprotein phosphatase activity);GO:0004722(protein serine/threonine phosphatase activity);GO:0005515(protein binding);GO:0005634(nucleus);GO:0005737(cytoplasm);GO:0005829(cytosol);GO:0006470(protein dephosphorylation);GO:0009409(response to cold);GO:0009414(response to water deprivation);GO:0009737(response to abscisic acid);GO:0009738(abscisic acid-activated signaling pathway);GO…	0.168336	undirected	TUBB8	PP2CA
TRINITY_DN72466_c2_g1	-	-	TRINITY_DN78705_c0_g2	han04016(MAPK signaling pathway - plant);han04075(Plant hormone signal transduction)	GO:0004721(phosphoprotein phosphatase activity);GO:0004722(protein serine/threonine phosphatase activity);GO:0005515(protein binding);GO:0005634(nucleus);GO:0005737(cytoplasm);GO:0005829(cytosol);GO:0006470(protein dephosphorylation);GO:0009409(response to cold);GO:0009414(response to water deprivation);GO:0009737(response to abscisic acid);GO:0009738(abscisic acid-activated signaling pathway);GO…	0.167768	undirected	-	PP2CA
TRINITY_DN62335_c0_g1	-	-	TRINITY_DN78705_c0_g2	han04016(MAPK signaling pathway - plant);han04075(Plant hormone signal transduction)	GO:0004721(phosphoprotein phosphatase activity);GO:0004722(protein serine/threonine phosphatase activity);GO:0005515(protein binding);GO:0005634(nucleus);GO:0005737(cytoplasm);GO:0005829(cytosol);GO:0006470(protein dephosphorylation);GO:0009409(response to cold);GO:0009414(response to water deprivation);GO:0009737(response to abscisic acid);GO:0009738(abscisic acid-activated signaling pathway);GO…	0.167587	undirected	-	PP2CA
TRINITY_DN57843_c0_g3	-	-	TRINITY_DN78705_c0_g2	han04016(MAPK signaling pathway - plant);han04075(Plant hormone signal transduction)	GO:0004721(phosphoprotein phosphatase activity);GO:0004722(protein serine/threonine phosphatase activity);GO:0005515(protein binding);GO:0005634(nucleus);GO:0005737(cytoplasm);GO:0005829(cytosol);GO:0006470(protein dephosphorylation);GO:0009409(response to cold);GO:0009414(response to water deprivation);GO:0009737(response to abscisic acid);GO:0009738(abscisic acid-activated signaling pathway);GO…	0.165058	undirected	-	PP2CA
TRINITY_DN85986_c0_g1	-	GO:0005886(plasma membrane);GO:0009409(response to cold);GO:0009414(response to water deprivation);GO:0009651(response to salt stress);GO:0009737(response to abscisic acid)	TRINITY_DN78705_c0_g2	han04016(MAPK signaling pathway - plant);han04075(Plant hormone signal transduction)	GO:0004721(phosphoprotein phosphatase activity);GO:0004722(protein serine/threonine phosphatase activity);GO:0005515(protein binding);GO:0005634(nucleus);GO:0005737(cytoplasm);GO:0005829(cytosol);GO:0006470(protein dephosphorylation);GO:0009409(response to cold);GO:0009414(response to water deprivation);GO:0009737(response to abscisic acid);GO:0009738(abscisic acid-activated signaling pathway);GO…	0.164055	undirected	LTI6A	PP2CA
TRINITY_DN56385_c0_g1	-	-	TRINITY_DN78705_c0_g2	han04016(MAPK signaling pathway - plant);han04075(Plant hormone signal transduction)	GO:0004721(phosphoprotein phosphatase activity);GO:0004722(protein serine/threonine phosphatase activity);GO:0005515(protein binding);GO:0005634(nucleus);GO:0005737(cytoplasm);GO:0005829(cytosol);GO:0006470(protein dephosphorylation);GO:0009409(response to cold);GO:0009414(response to water deprivation);GO:0009737(response to abscisic acid);GO:0009738(abscisic acid-activated signaling pathway);GO…	0.159841	undirected	-	PP2CA
TRINITY_DN72794_c2_g2	-	-	TRINITY_DN78705_c0_g2	han04016(MAPK signaling pathway - plant);han04075(Plant hormone signal transduction)	GO:0004721(phosphoprotein phosphatase activity);GO:0004722(protein serine/threonine phosphatase activity);GO:0005515(protein binding);GO:0005634(nucleus);GO:0005737(cytoplasm);GO:0005829(cytosol);GO:0006470(protein dephosphorylation);GO:0009409(response to cold);GO:0009414(response to water deprivation);GO:0009737(response to abscisic acid);GO:0009738(abscisic acid-activated signaling pathway);GO…	0.156829	undirected	UBI11	PP2CA
TRINITY_DN59565_c0_g1	NA(NA)	GO:0004674(protein serine/threonine kinase activity);GO:0005524(ATP binding);GO:0005622(intracellular);GO:0005886(plasma membrane);GO:0016301(kinase activity);GO:0018105(peptidyl-serine phosphorylation);GO:0018107(peptidyl-threonine phosphorylation);GO:0035556(intracellular signal transduction)	TRINITY_DN78705_c0_g2	han04016(MAPK signaling pathway - plant);han04075(Plant hormone signal transduction)	GO:0004721(phosphoprotein phosphatase activity);GO:0004722(protein serine/threonine phosphatase activity);GO:0005515(protein binding);GO:0005634(nucleus);GO:0005737(cytoplasm);GO:0005829(cytosol);GO:0006470(protein dephosphorylation);GO:0009409(response to cold);GO:0009414(response to water deprivation);GO:0009737(response to abscisic acid);GO:0009738(abscisic acid-activated signaling pathway);GO…	0.153956	undirected	CIPK2	PP2CA
TRINITY_DN78282_c0_g3	-	-	TRINITY_DN78705_c0_g2	han04016(MAPK signaling pathway - plant);han04075(Plant hormone signal transduction)	GO:0004721(phosphoprotein phosphatase activity);GO:0004722(protein serine/threonine phosphatase activity);GO:0005515(protein binding);GO:0005634(nucleus);GO:0005737(cytoplasm);GO:0005829(cytosol);GO:0006470(protein dephosphorylation);GO:0009409(response to cold);GO:0009414(response to water deprivation);GO:0009737(response to abscisic acid);GO:0009738(abscisic acid-activated signaling pathway);GO…	0.151072	undirected	-	PP2CA
TRINITY_DN63940_c0_g1	-	-	TRINITY_DN78705_c0_g2	han04016(MAPK signaling pathway - plant);han04075(Plant hormone signal transduction)	GO:0004721(phosphoprotein phosphatase activity);GO:0004722(protein serine/threonine phosphatase activity);GO:0005515(protein binding);GO:0005634(nucleus);GO:0005737(cytoplasm);GO:0005829(cytosol);GO:0006470(protein dephosphorylation);GO:0009409(response to cold);GO:0009414(response to water deprivation);GO:0009737(response to abscisic acid);GO:0009738(abscisic acid-activated signaling pathway);GO…	0.150462	undirected	-	PP2CA
TRINITY_DN81526_c3_g1	han00240(Pyrimidine metabolism);han00410(beta-Alanine metabolism);han00770(Pantothenate and CoA biosynthesis)	GO:0005886(plasma membrane);GO:0006207('de novo' pyrimidine nucleobase biosynthetic process);GO:0006212(uracil catabolic process);GO:0009507(chloroplast);GO:0009536(plastid);GO:0009570(chloroplast stroma);GO:0016627(oxidoreductase activity, acting on the CH-CH group of donors);GO:0017113(dihydropyrimidine dehydrogenase (NADP+) activity);GO:0019483(beta-alanine biosynthetic process);GO:0043562(cel…	TRINITY_DN78705_c0_g2	han04016(MAPK signaling pathway - plant);han04075(Plant hormone signal transduction)	GO:0004721(phosphoprotein phosphatase activity);GO:0004722(protein serine/threonine phosphatase activity);GO:0005515(protein binding);GO:0005634(nucleus);GO:0005737(cytoplasm);GO:0005829(cytosol);GO:0006470(protein dephosphorylation);GO:0009409(response to cold);GO:0009414(response to water deprivation);GO:0009737(response to abscisic acid);GO:0009738(abscisic acid-activated signaling pathway);GO…	0.149907	undirected	PYD1	PP2CA
TRINITY_DN79008_c1_g1	-	-	TRINITY_DN78705_c0_g2	han04016(MAPK signaling pathway - plant);han04075(Plant hormone signal transduction)	GO:0004721(phosphoprotein phosphatase activity);GO:0004722(protein serine/threonine phosphatase activity);GO:0005515(protein binding);GO:0005634(nucleus);GO:0005737(cytoplasm);GO:0005829(cytosol);GO:0006470(protein dephosphorylation);GO:0009409(response to cold);GO:0009414(response to water deprivation);GO:0009737(response to abscisic acid);GO:0009738(abscisic acid-activated signaling pathway);GO…	0.147772	undirected	-	PP2CA
TRINITY_DN69644_c0_g3	-	-	TRINITY_DN78705_c0_g2	han04016(MAPK signaling pathway - plant);han04075(Plant hormone signal transduction)	GO:0004721(phosphoprotein phosphatase activity);GO:0004722(protein serine/threonine phosphatase activity);GO:0005515(protein binding);GO:0005634(nucleus);GO:0005737(cytoplasm);GO:0005829(cytosol);GO:0006470(protein dephosphorylation);GO:0009409(response to cold);GO:0009414(response to water deprivation);GO:0009737(response to abscisic acid);GO:0009738(abscisic acid-activated signaling pathway);GO…	0.145608	undirected	-	PP2CA
TRINITY_DN83699_c2_g1	han00906(Carotenoid biosynthesis)	GO:0006970(response to osmotic stress);GO:0009414(response to water deprivation);GO:0009507(chloroplast);GO:0009535(chloroplast thylakoid membrane);GO:0009570(chloroplast stroma);GO:0009688(abscisic acid biosynthetic process);GO:0042538(hyperosmotic salinity response);GO:0045549(9-cis-epoxycarotenoid dioxygenase activity);GO:0046872(metal ion binding);GO:0055114(oxidation-reduction process)	TRINITY_DN78705_c0_g2	han04016(MAPK signaling pathway - plant);han04075(Plant hormone signal transduction)	GO:0004721(phosphoprotein phosphatase activity);GO:0004722(protein serine/threonine phosphatase activity);GO:0005515(protein binding);GO:0005634(nucleus);GO:0005737(cytoplasm);GO:0005829(cytosol);GO:0006470(protein dephosphorylation);GO:0009409(response to cold);GO:0009414(response to water deprivation);GO:0009737(response to abscisic acid);GO:0009738(abscisic acid-activated signaling pathway);GO…	0.145282	undirected	NCED3	PP2CA
TRINITY_DN63365_c0_g1	-	-	TRINITY_DN61103_c1_g2	gmx04016(MAPK signaling pathway - plant);gmx04075(Plant hormone signal transduction)	GO:0004721(phosphoprotein phosphatase activity);GO:0004722(protein serine/threonine phosphatase activity);GO:0005509(calcium ion binding);GO:0005515(protein binding);GO:0005634(nucleus);GO:0005737(cytoplasm);GO:0005886(plasma membrane);GO:0006470(protein dephosphorylation);GO:0008287(protein serine/threonine phosphatase complex);GO:0009408(response to heat);GO:0009409(response to cold);GO:0009737…	0.176077	undirected	-	ABI1
TRINITY_DN76573_c0_g1	NA(NA)	GO:0005634(nucleus);GO:0005737(cytoplasm);GO:0006952(defense response);GO:0016740(transferase activity);GO:0043067(regulation of programmed cell death);GO:0043161(proteasome-mediated ubiquitin-dependent protein catabolic process);GO:0046872(metal ion binding)	TRINITY_DN61103_c1_g2	gmx04016(MAPK signaling pathway - plant);gmx04075(Plant hormone signal transduction)	GO:0004721(phosphoprotein phosphatase activity);GO:0004722(protein serine/threonine phosphatase activity);GO:0005509(calcium ion binding);GO:0005515(protein binding);GO:0005634(nucleus);GO:0005737(cytoplasm);GO:0005886(plasma membrane);GO:0006470(protein dephosphorylation);GO:0008287(protein serine/threonine phosphatase complex);GO:0009408(response to heat);GO:0009409(response to cold);GO:0009737…	0.174175	undirected	BRG3	ABI1
TRINITY_DN75269_c0_g1	-	-	TRINITY_DN61103_c1_g2	gmx04016(MAPK signaling pathway - plant);gmx04075(Plant hormone signal transduction)	GO:0004721(phosphoprotein phosphatase activity);GO:0004722(protein serine/threonine phosphatase activity);GO:0005509(calcium ion binding);GO:0005515(protein binding);GO:0005634(nucleus);GO:0005737(cytoplasm);GO:0005886(plasma membrane);GO:0006470(protein dephosphorylation);GO:0008287(protein serine/threonine phosphatase complex);GO:0009408(response to heat);GO:0009409(response to cold);GO:0009737…	0.171931	undirected	-	ABI1
TRINITY_DN83699_c2_g1	han00906(Carotenoid biosynthesis)	GO:0006970(response to osmotic stress);GO:0009414(response to water deprivation);GO:0009507(chloroplast);GO:0009535(chloroplast thylakoid membrane);GO:0009570(chloroplast stroma);GO:0009688(abscisic acid biosynthetic process);GO:0042538(hyperosmotic salinity response);GO:0045549(9-cis-epoxycarotenoid dioxygenase activity);GO:0046872(metal ion binding);GO:0055114(oxidation-reduction process)	TRINITY_DN61103_c1_g2	gmx04016(MAPK signaling pathway - plant);gmx04075(Plant hormone signal transduction)	GO:0004721(phosphoprotein phosphatase activity);GO:0004722(protein serine/threonine phosphatase activity);GO:0005509(calcium ion binding);GO:0005515(protein binding);GO:0005634(nucleus);GO:0005737(cytoplasm);GO:0005886(plasma membrane);GO:0006470(protein dephosphorylation);GO:0008287(protein serine/threonine phosphatase complex);GO:0009408(response to heat);GO:0009409(response to cold);GO:0009737…	0.169412	undirected	NCED3	ABI1
TRINITY_DN69631_c0_g1	-	GO:0005634(nucleus);GO:0006970(response to osmotic stress);GO:0009414(response to water deprivation);GO:0009651(response to salt stress);GO:0009737(response to abscisic acid);GO:0009738(abscisic acid-activated signaling pathway);GO:0010029(regulation of seed germination);GO:0010228(vegetative to reproductive phase transition of meristem)	TRINITY_DN61103_c1_g2	gmx04016(MAPK signaling pathway - plant);gmx04075(Plant hormone signal transduction)	GO:0004721(phosphoprotein phosphatase activity);GO:0004722(protein serine/threonine phosphatase activity);GO:0005509(calcium ion binding);GO:0005515(protein binding);GO:0005634(nucleus);GO:0005737(cytoplasm);GO:0005886(plasma membrane);GO:0006470(protein dephosphorylation);GO:0008287(protein serine/threonine phosphatase complex);GO:0009408(response to heat);GO:0009409(response to cold);GO:0009737…	0.166443	undirected	EDL3	ABI1
TRINITY_DN64920_c1_g4	han00500(Starch and sucrose metabolism)	GO:0005982(starch metabolic process);GO:0005985(sucrose metabolic process);GO:0005986(sucrose biosynthetic process);GO:0008194(UDP-glycosyltransferase activity);GO:0009414(response to water deprivation);GO:0009507(chloroplast);GO:0010431(seed maturation);GO:0010555(response to mannitol);GO:0016157(sucrose synthase activity);GO:0016757(transferase activity, transferring glycosyl groups)	TRINITY_DN61103_c1_g2	gmx04016(MAPK signaling pathway - plant);gmx04075(Plant hormone signal transduction)	GO:0004721(phosphoprotein phosphatase activity);GO:0004722(protein serine/threonine phosphatase activity);GO:0005509(calcium ion binding);GO:0005515(protein binding);GO:0005634(nucleus);GO:0005737(cytoplasm);GO:0005886(plasma membrane);GO:0006470(protein dephosphorylation);GO:0008287(protein serine/threonine phosphatase complex);GO:0009408(response to heat);GO:0009409(response to cold);GO:0009737…	0.163616	undirected	SUS2	ABI1
TRINITY_DN76317_c0_g1	NA(NA)	GO:0003333(amino acid transmembrane transport);GO:0015171(amino acid transmembrane transporter activity)	TRINITY_DN61103_c1_g2	gmx04016(MAPK signaling pathway - plant);gmx04075(Plant hormone signal transduction)	GO:0004721(phosphoprotein phosphatase activity);GO:0004722(protein serine/threonine phosphatase activity);GO:0005509(calcium ion binding);GO:0005515(protein binding);GO:0005634(nucleus);GO:0005737(cytoplasm);GO:0005886(plasma membrane);GO:0006470(protein dephosphorylation);GO:0008287(protein serine/threonine phosphatase complex);GO:0009408(response to heat);GO:0009409(response to cold);GO:0009737…	0.159184	undirected	AVT1	ABI1
TRINITY_DN67560_c0_g1	han00940(Phenylpropanoid biosynthesis)	GO:0005737(cytoplasm);GO:0008270(zinc ion binding);GO:0009809(lignin biosynthetic process);GO:0045551(cinnamyl-alcohol dehydrogenase activity);GO:0052747(sinapyl alcohol dehydrogenase activity);GO:0055114(oxidation-reduction process);GO:0080167(response to karrikin)	TRINITY_DN61103_c1_g2	gmx04016(MAPK signaling pathway - plant);gmx04075(Plant hormone signal transduction)	GO:0004721(phosphoprotein phosphatase activity);GO:0004722(protein serine/threonine phosphatase activity);GO:0005509(calcium ion binding);GO:0005515(protein binding);GO:0005634(nucleus);GO:0005737(cytoplasm);GO:0005886(plasma membrane);GO:0006470(protein dephosphorylation);GO:0008287(protein serine/threonine phosphatase complex);GO:0009408(response to heat);GO:0009409(response to cold);GO:0009737…	0.15749	undirected	CAD1	ABI1
TRINITY_DN62335_c0_g1	-	-	TRINITY_DN61103_c1_g2	gmx04016(MAPK signaling pathway - plant);gmx04075(Plant hormone signal transduction)	GO:0004721(phosphoprotein phosphatase activity);GO:0004722(protein serine/threonine phosphatase activity);GO:0005509(calcium ion binding);GO:0005515(protein binding);GO:0005634(nucleus);GO:0005737(cytoplasm);GO:0005886(plasma membrane);GO:0006470(protein dephosphorylation);GO:0008287(protein serine/threonine phosphatase complex);GO:0009408(response to heat);GO:0009409(response to cold);GO:0009737…	0.156427	undirected	-	ABI1
TRINITY_DN63131_c0_g2	-	-	TRINITY_DN61103_c1_g2	gmx04016(MAPK signaling pathway - plant);gmx04075(Plant hormone signal transduction)	GO:0004721(phosphoprotein phosphatase activity);GO:0004722(protein serine/threonine phosphatase activity);GO:0005509(calcium ion binding);GO:0005515(protein binding);GO:0005634(nucleus);GO:0005737(cytoplasm);GO:0005886(plasma membrane);GO:0006470(protein dephosphorylation);GO:0008287(protein serine/threonine phosphatase complex);GO:0009408(response to heat);GO:0009409(response to cold);GO:0009737…	0.153963	undirected	-	ABI1
TRINITY_DN76037_c0_g3	han04016(MAPK signaling pathway - plant);han04075(Plant hormone signal transduction)	GO:0004722(protein serine/threonine phosphatase activity);GO:0005886(plasma membrane);GO:0006470(protein dephosphorylation);GO:0046872(metal ion binding)	TRINITY_DN61103_c1_g2	gmx04016(MAPK signaling pathway - plant);gmx04075(Plant hormone signal transduction)	GO:0004721(phosphoprotein phosphatase activity);GO:0004722(protein serine/threonine phosphatase activity);GO:0005509(calcium ion binding);GO:0005515(protein binding);GO:0005634(nucleus);GO:0005737(cytoplasm);GO:0005886(plasma membrane);GO:0006470(protein dephosphorylation);GO:0008287(protein serine/threonine phosphatase complex);GO:0009408(response to heat);GO:0009409(response to cold);GO:0009737…	0.153607	undirected	At2g29380	ABI1
TRINITY_DN67524_c0_g1	cic04145(Phagosome)	GO:0003924(GTPase activity);GO:0005200(structural constituent of cytoskeleton);GO:0005515(protein binding);GO:0005525(GTP binding);GO:0005737(cytoplasm);GO:0005794(Golgi apparatus);GO:0005874(microtubule);GO:0007017(microtubule-based process);GO:0009651(response to salt stress);GO:0016020(membrane);GO:0045298(tubulin complex)	TRINITY_DN61103_c1_g2	gmx04016(MAPK signaling pathway - plant);gmx04075(Plant hormone signal transduction)	GO:0004721(phosphoprotein phosphatase activity);GO:0004722(protein serine/threonine phosphatase activity);GO:0005509(calcium ion binding);GO:0005515(protein binding);GO:0005634(nucleus);GO:0005737(cytoplasm);GO:0005886(plasma membrane);GO:0006470(protein dephosphorylation);GO:0008287(protein serine/threonine phosphatase complex);GO:0009408(response to heat);GO:0009409(response to cold);GO:0009737…	0.152182	undirected	TUBB8	ABI1
TRINITY_DN78282_c0_g3	-	-	TRINITY_DN61103_c1_g2	gmx04016(MAPK signaling pathway - plant);gmx04075(Plant hormone signal transduction)	GO:0004721(phosphoprotein phosphatase activity);GO:0004722(protein serine/threonine phosphatase activity);GO:0005509(calcium ion binding);GO:0005515(protein binding);GO:0005634(nucleus);GO:0005737(cytoplasm);GO:0005886(plasma membrane);GO:0006470(protein dephosphorylation);GO:0008287(protein serine/threonine phosphatase complex);GO:0009408(response to heat);GO:0009409(response to cold);GO:0009737…	0.150227	undirected	-	ABI1
TRINITY_DN57843_c0_g3	-	-	TRINITY_DN61103_c1_g2	gmx04016(MAPK signaling pathway - plant);gmx04075(Plant hormone signal transduction)	GO:0004721(phosphoprotein phosphatase activity);GO:0004722(protein serine/threonine phosphatase activity);GO:0005509(calcium ion binding);GO:0005515(protein binding);GO:0005634(nucleus);GO:0005737(cytoplasm);GO:0005886(plasma membrane);GO:0006470(protein dephosphorylation);GO:0008287(protein serine/threonine phosphatase complex);GO:0009408(response to heat);GO:0009409(response to cold);GO:0009737…	0.149597	undirected	-	ABI1
TRINITY_DN69337_c0_g2	NA(NA)	GO:0003677(DNA binding);GO:0003700(DNA binding transcription factor activity);GO:0005634(nucleus);GO:0006351(transcription, DNA-templated);GO:0006355(regulation of transcription, DNA-templated);GO:0009733(response to auxin);GO:0043565(sequence-specific DNA binding)	TRINITY_DN61103_c1_g2	gmx04016(MAPK signaling pathway - plant);gmx04075(Plant hormone signal transduction)	GO:0004721(phosphoprotein phosphatase activity);GO:0004722(protein serine/threonine phosphatase activity);GO:0005509(calcium ion binding);GO:0005515(protein binding);GO:0005634(nucleus);GO:0005737(cytoplasm);GO:0005886(plasma membrane);GO:0006470(protein dephosphorylation);GO:0008287(protein serine/threonine phosphatase complex);GO:0009408(response to heat);GO:0009409(response to cold);GO:0009737…	0.148485	undirected	ATHB-40	ABI1
TRINITY_DN58008_c1_g3	-	-	TRINITY_DN61103_c1_g2	gmx04016(MAPK signaling pathway - plant);gmx04075(Plant hormone signal transduction)	GO:0004721(phosphoprotein phosphatase activity);GO:0004722(protein serine/threonine phosphatase activity);GO:0005509(calcium ion binding);GO:0005515(protein binding);GO:0005634(nucleus);GO:0005737(cytoplasm);GO:0005886(plasma membrane);GO:0006470(protein dephosphorylation);GO:0008287(protein serine/threonine phosphatase complex);GO:0009408(response to heat);GO:0009409(response to cold);GO:0009737…	0.144979	undirected	-	ABI1
TRINITY_DN82852_c0_g1	NA(NA)	GO:0000977(RNA polymerase II regulatory region sequence-specific DNA binding);GO:0003700(DNA binding transcription factor activity);GO:0005515(protein binding);GO:0005634(nucleus);GO:0005829(cytosol);GO:0006351(transcription, DNA-templated);GO:0006355(regulation of transcription, DNA-templated);GO:0009737(response to abscisic acid);GO:0043565(sequence-specific DNA binding);GO:0044212(transcriptio…	TRINITY_DN61103_c1_g2	gmx04016(MAPK signaling pathway - plant);gmx04075(Plant hormone signal transduction)	GO:0004721(phosphoprotein phosphatase activity);GO:0004722(protein serine/threonine phosphatase activity);GO:0005509(calcium ion binding);GO:0005515(protein binding);GO:0005634(nucleus);GO:0005737(cytoplasm);GO:0005886(plasma membrane);GO:0006470(protein dephosphorylation);GO:0008287(protein serine/threonine phosphatase complex);GO:0009408(response to heat);GO:0009409(response to cold);GO:0009737…	0.142568	undirected	CPRF1	ABI1
TRINITY_DN74340_c0_g1	NA(NA)	GO:0005634(nucleus);GO:0005737(cytoplasm)	TRINITY_DN61103_c1_g2	gmx04016(MAPK signaling pathway - plant);gmx04075(Plant hormone signal transduction)	GO:0004721(phosphoprotein phosphatase activity);GO:0004722(protein serine/threonine phosphatase activity);GO:0005509(calcium ion binding);GO:0005515(protein binding);GO:0005634(nucleus);GO:0005737(cytoplasm);GO:0005886(plasma membrane);GO:0006470(protein dephosphorylation);GO:0008287(protein serine/threonine phosphatase complex);GO:0009408(response to heat);GO:0009409(response to cold);GO:0009737…	0.142202	undirected	PUB13	ABI1
TRINITY_DN60084_c1_g1	-	-	TRINITY_DN61103_c1_g2	gmx04016(MAPK signaling pathway - plant);gmx04075(Plant hormone signal transduction)	GO:0004721(phosphoprotein phosphatase activity);GO:0004722(protein serine/threonine phosphatase activity);GO:0005509(calcium ion binding);GO:0005515(protein binding);GO:0005634(nucleus);GO:0005737(cytoplasm);GO:0005886(plasma membrane);GO:0006470(protein dephosphorylation);GO:0008287(protein serine/threonine phosphatase complex);GO:0009408(response to heat);GO:0009409(response to cold);GO:0009737…	0.140556	undirected	-	ABI1
TRINITY_DN63131_c0_g3	-	-	TRINITY_DN61103_c1_g2	gmx04016(MAPK signaling pathway - plant);gmx04075(Plant hormone signal transduction)	GO:0004721(phosphoprotein phosphatase activity);GO:0004722(protein serine/threonine phosphatase activity);GO:0005509(calcium ion binding);GO:0005515(protein binding);GO:0005634(nucleus);GO:0005737(cytoplasm);GO:0005886(plasma membrane);GO:0006470(protein dephosphorylation);GO:0008287(protein serine/threonine phosphatase complex);GO:0009408(response to heat);GO:0009409(response to cold);GO:0009737…	0.140292	undirected	-	ABI1
TRINITY_DN83699_c2_g1	han00906(Carotenoid biosynthesis)	GO:0006970(response to osmotic stress);GO:0009414(response to water deprivation);GO:0009507(chloroplast);GO:0009535(chloroplast thylakoid membrane);GO:0009570(chloroplast stroma);GO:0009688(abscisic acid biosynthetic process);GO:0042538(hyperosmotic salinity response);GO:0045549(9-cis-epoxycarotenoid dioxygenase activity);GO:0046872(metal ion binding);GO:0055114(oxidation-reduction process)	TRINITY_DN80528_c1_g1	han04075(Plant hormone signal transduction)	GO:0000976(transcription regulatory region sequence-specific DNA binding);GO:0000977(RNA polymerase II regulatory region sequence-specific DNA binding);GO:0003677(DNA binding);GO:0003700(DNA binding transcription factor activity);GO:0005515(protein binding);GO:0005634(nucleus);GO:0006351(transcription, DNA-templated);GO:0006355(regulation of transcription, DNA-templated);GO:0009414(response to wa…	0.17096	undirected	NCED3	ABF2
TRINITY_DN85986_c0_g1	-	GO:0005886(plasma membrane);GO:0009409(response to cold);GO:0009414(response to water deprivation);GO:0009651(response to salt stress);GO:0009737(response to abscisic acid)	TRINITY_DN80528_c1_g1	han04075(Plant hormone signal transduction)	GO:0000976(transcription regulatory region sequence-specific DNA binding);GO:0000977(RNA polymerase II regulatory region sequence-specific DNA binding);GO:0003677(DNA binding);GO:0003700(DNA binding transcription factor activity);GO:0005515(protein binding);GO:0005634(nucleus);GO:0006351(transcription, DNA-templated);GO:0006355(regulation of transcription, DNA-templated);GO:0009414(response to wa…	0.16816	undirected	LTI6A	ABF2
TRINITY_DN57843_c0_g3	-	-	TRINITY_DN80528_c1_g1	han04075(Plant hormone signal transduction)	GO:0000976(transcription regulatory region sequence-specific DNA binding);GO:0000977(RNA polymerase II regulatory region sequence-specific DNA binding);GO:0003677(DNA binding);GO:0003700(DNA binding transcription factor activity);GO:0005515(protein binding);GO:0005634(nucleus);GO:0006351(transcription, DNA-templated);GO:0006355(regulation of transcription, DNA-templated);GO:0009414(response to wa…	0.168069	undirected	-	ABF2
TRINITY_DN69631_c0_g1	-	GO:0005634(nucleus);GO:0006970(response to osmotic stress);GO:0009414(response to water deprivation);GO:0009651(response to salt stress);GO:0009737(response to abscisic acid);GO:0009738(abscisic acid-activated signaling pathway);GO:0010029(regulation of seed germination);GO:0010228(vegetative to reproductive phase transition of meristem)	TRINITY_DN80528_c1_g1	han04075(Plant hormone signal transduction)	GO:0000976(transcription regulatory region sequence-specific DNA binding);GO:0000977(RNA polymerase II regulatory region sequence-specific DNA binding);GO:0003677(DNA binding);GO:0003700(DNA binding transcription factor activity);GO:0005515(protein binding);GO:0005634(nucleus);GO:0006351(transcription, DNA-templated);GO:0006355(regulation of transcription, DNA-templated);GO:0009414(response to wa…	0.165232	undirected	EDL3	ABF2
TRINITY_DN60070_c2_g5	-	-	TRINITY_DN80528_c1_g1	han04075(Plant hormone signal transduction)	GO:0000976(transcription regulatory region sequence-specific DNA binding);GO:0000977(RNA polymerase II regulatory region sequence-specific DNA binding);GO:0003677(DNA binding);GO:0003700(DNA binding transcription factor activity);GO:0005515(protein binding);GO:0005634(nucleus);GO:0006351(transcription, DNA-templated);GO:0006355(regulation of transcription, DNA-templated);GO:0009414(response to wa…	0.164659	undirected	-	ABF2
TRINITY_DN78282_c0_g3	-	-	TRINITY_DN80528_c1_g1	han04075(Plant hormone signal transduction)	GO:0000976(transcription regulatory region sequence-specific DNA binding);GO:0000977(RNA polymerase II regulatory region sequence-specific DNA binding);GO:0003677(DNA binding);GO:0003700(DNA binding transcription factor activity);GO:0005515(protein binding);GO:0005634(nucleus);GO:0006351(transcription, DNA-templated);GO:0006355(regulation of transcription, DNA-templated);GO:0009414(response to wa…	0.163519	undirected	-	ABF2
TRINITY_DN63365_c0_g1	-	-	TRINITY_DN80528_c1_g1	han04075(Plant hormone signal transduction)	GO:0000976(transcription regulatory region sequence-specific DNA binding);GO:0000977(RNA polymerase II regulatory region sequence-specific DNA binding);GO:0003677(DNA binding);GO:0003700(DNA binding transcription factor activity);GO:0005515(protein binding);GO:0005634(nucleus);GO:0006351(transcription, DNA-templated);GO:0006355(regulation of transcription, DNA-templated);GO:0009414(response to wa…	0.162499	undirected	-	ABF2
TRINITY_DN76573_c0_g1	NA(NA)	GO:0005634(nucleus);GO:0005737(cytoplasm);GO:0006952(defense response);GO:0016740(transferase activity);GO:0043067(regulation of programmed cell death);GO:0043161(proteasome-mediated ubiquitin-dependent protein catabolic process);GO:0046872(metal ion binding)	TRINITY_DN80528_c1_g1	han04075(Plant hormone signal transduction)	GO:0000976(transcription regulatory region sequence-specific DNA binding);GO:0000977(RNA polymerase II regulatory region sequence-specific DNA binding);GO:0003677(DNA binding);GO:0003700(DNA binding transcription factor activity);GO:0005515(protein binding);GO:0005634(nucleus);GO:0006351(transcription, DNA-templated);GO:0006355(regulation of transcription, DNA-templated);GO:0009414(response to wa…	0.15847	undirected	BRG3	ABF2
TRINITY_DN65128_c1_g1	han04016(MAPK signaling pathway - plant);han04075(Plant hormone signal transduction)	GO:0004674(protein serine/threonine kinase activity);GO:0005634(nucleus);GO:0005737(cytoplasm);GO:0006468(protein phosphorylation);GO:0035556(intracellular signal transduction)	TRINITY_DN80528_c1_g1	han04075(Plant hormone signal transduction)	GO:0000976(transcription regulatory region sequence-specific DNA binding);GO:0000977(RNA polymerase II regulatory region sequence-specific DNA binding);GO:0003677(DNA binding);GO:0003700(DNA binding transcription factor activity);GO:0005515(protein binding);GO:0005634(nucleus);GO:0006351(transcription, DNA-templated);GO:0006355(regulation of transcription, DNA-templated);GO:0009414(response to wa…	0.14946	undirected	SAPK3	ABF2
TRINITY_DN67560_c0_g1	han00940(Phenylpropanoid biosynthesis)	GO:0005737(cytoplasm);GO:0008270(zinc ion binding);GO:0009809(lignin biosynthetic process);GO:0045551(cinnamyl-alcohol dehydrogenase activity);GO:0052747(sinapyl alcohol dehydrogenase activity);GO:0055114(oxidation-reduction process);GO:0080167(response to karrikin)	TRINITY_DN80528_c1_g1	han04075(Plant hormone signal transduction)	GO:0000976(transcription regulatory region sequence-specific DNA binding);GO:0000977(RNA polymerase II regulatory region sequence-specific DNA binding);GO:0003677(DNA binding);GO:0003700(DNA binding transcription factor activity);GO:0005515(protein binding);GO:0005634(nucleus);GO:0006351(transcription, DNA-templated);GO:0006355(regulation of transcription, DNA-templated);GO:0009414(response to wa…	0.145711	undirected	CAD1	ABF2
TRINITY_DN59565_c0_g1	NA(NA)	GO:0004674(protein serine/threonine kinase activity);GO:0005524(ATP binding);GO:0005622(intracellular);GO:0005886(plasma membrane);GO:0016301(kinase activity);GO:0018105(peptidyl-serine phosphorylation);GO:0018107(peptidyl-threonine phosphorylation);GO:0035556(intracellular signal transduction)	TRINITY_DN80528_c1_g1	han04075(Plant hormone signal transduction)	GO:0000976(transcription regulatory region sequence-specific DNA binding);GO:0000977(RNA polymerase II regulatory region sequence-specific DNA binding);GO:0003677(DNA binding);GO:0003700(DNA binding transcription factor activity);GO:0005515(protein binding);GO:0005634(nucleus);GO:0006351(transcription, DNA-templated);GO:0006355(regulation of transcription, DNA-templated);GO:0009414(response to wa…	0.143244	undirected	CIPK2	ABF2
TRINITY_DN63131_c0_g2	-	-	TRINITY_DN80528_c1_g1	han04075(Plant hormone signal transduction)	GO:0000976(transcription regulatory region sequence-specific DNA binding);GO:0000977(RNA polymerase II regulatory region sequence-specific DNA binding);GO:0003677(DNA binding);GO:0003700(DNA binding transcription factor activity);GO:0005515(protein binding);GO:0005634(nucleus);GO:0006351(transcription, DNA-templated);GO:0006355(regulation of transcription, DNA-templated);GO:0009414(response to wa…	0.142636	undirected	-	ABF2
TRINITY_DN63060_c0_g2	NA(NA)	GO:0004674(protein serine/threonine kinase activity);GO:0005524(ATP binding);GO:0005634(nucleus);GO:0006468(protein phosphorylation);GO:0006952(defense response);GO:0016301(kinase activity);GO:0016310(phosphorylation)	TRINITY_DN80528_c1_g1	han04075(Plant hormone signal transduction)	GO:0000976(transcription regulatory region sequence-specific DNA binding);GO:0000977(RNA polymerase II regulatory region sequence-specific DNA binding);GO:0003677(DNA binding);GO:0003700(DNA binding transcription factor activity);GO:0005515(protein binding);GO:0005634(nucleus);GO:0006351(transcription, DNA-templated);GO:0006355(regulation of transcription, DNA-templated);GO:0009414(response to wa…	0.141706	undirected	PBL6	ABF2
TRINITY_DN64920_c1_g4	han00500(Starch and sucrose metabolism)	GO:0005982(starch metabolic process);GO:0005985(sucrose metabolic process);GO:0005986(sucrose biosynthetic process);GO:0008194(UDP-glycosyltransferase activity);GO:0009414(response to water deprivation);GO:0009507(chloroplast);GO:0010431(seed maturation);GO:0010555(response to mannitol);GO:0016157(sucrose synthase activity);GO:0016757(transferase activity, transferring glycosyl groups)	TRINITY_DN80528_c1_g1	han04075(Plant hormone signal transduction)	GO:0000976(transcription regulatory region sequence-specific DNA binding);GO:0000977(RNA polymerase II regulatory region sequence-specific DNA binding);GO:0003677(DNA binding);GO:0003700(DNA binding transcription factor activity);GO:0005515(protein binding);GO:0005634(nucleus);GO:0006351(transcription, DNA-templated);GO:0006355(regulation of transcription, DNA-templated);GO:0009414(response to wa…	0.139854	undirected	SUS2	ABF2
TRINITY_DN62335_c0_g1	-	-	TRINITY_DN80528_c1_g1	han04075(Plant hormone signal transduction)	GO:0000976(transcription regulatory region sequence-specific DNA binding);GO:0000977(RNA polymerase II regulatory region sequence-specific DNA binding);GO:0003677(DNA binding);GO:0003700(DNA binding transcription factor activity);GO:0005515(protein binding);GO:0005634(nucleus);GO:0006351(transcription, DNA-templated);GO:0006355(regulation of transcription, DNA-templated);GO:0009414(response to wa…	0.138571	undirected	-	ABF2
TRINITY_DN75269_c0_g1	-	-	TRINITY_DN80528_c1_g1	han04075(Plant hormone signal transduction)	GO:0000976(transcription regulatory region sequence-specific DNA binding);GO:0000977(RNA polymerase II regulatory region sequence-specific DNA binding);GO:0003677(DNA binding);GO:0003700(DNA binding transcription factor activity);GO:0005515(protein binding);GO:0005634(nucleus);GO:0006351(transcription, DNA-templated);GO:0006355(regulation of transcription, DNA-templated);GO:0009414(response to wa…	0.136123	undirected	-	ABF2
TRINITY_DN76037_c0_g3	han04016(MAPK signaling pathway - plant);han04075(Plant hormone signal transduction)	GO:0004722(protein serine/threonine phosphatase activity);GO:0005886(plasma membrane);GO:0006470(protein dephosphorylation);GO:0046872(metal ion binding)	TRINITY_DN80528_c1_g1	han04075(Plant hormone signal transduction)	GO:0000976(transcription regulatory region sequence-specific DNA binding);GO:0000977(RNA polymerase II regulatory region sequence-specific DNA binding);GO:0003677(DNA binding);GO:0003700(DNA binding transcription factor activity);GO:0005515(protein binding);GO:0005634(nucleus);GO:0006351(transcription, DNA-templated);GO:0006355(regulation of transcription, DNA-templated);GO:0009414(response to wa…	0.134391	undirected	At2g29380	ABF2
TRINITY_DN76317_c0_g1	NA(NA)	GO:0003333(amino acid transmembrane transport);GO:0015171(amino acid transmembrane transporter activity)	TRINITY_DN80528_c1_g1	han04075(Plant hormone signal transduction)	GO:0000976(transcription regulatory region sequence-specific DNA binding);GO:0000977(RNA polymerase II regulatory region sequence-specific DNA binding);GO:0003677(DNA binding);GO:0003700(DNA binding transcription factor activity);GO:0005515(protein binding);GO:0005634(nucleus);GO:0006351(transcription, DNA-templated);GO:0006355(regulation of transcription, DNA-templated);GO:0009414(response to wa…	0.132392	undirected	AVT1	ABF2
TRINITY_DN70712_c0_g1	hbr04016(MAPK signaling pathway - plant)	GO:0005737(cytoplasm)	TRINITY_DN80528_c1_g1	han04075(Plant hormone signal transduction)	GO:0000976(transcription regulatory region sequence-specific DNA binding);GO:0000977(RNA polymerase II regulatory region sequence-specific DNA binding);GO:0003677(DNA binding);GO:0003700(DNA binding transcription factor activity);GO:0005515(protein binding);GO:0005634(nucleus);GO:0006351(transcription, DNA-templated);GO:0006355(regulation of transcription, DNA-templated);GO:0009414(response to wa…	0.130151	undirected	mkkA	ABF2
TRINITY_DN70604_c0_g6	-	-	TRINITY_DN80528_c1_g1	han04075(Plant hormone signal transduction)	GO:0000976(transcription regulatory region sequence-specific DNA binding);GO:0000977(RNA polymerase II regulatory region sequence-specific DNA binding);GO:0003677(DNA binding);GO:0003700(DNA binding transcription factor activity);GO:0005515(protein binding);GO:0005634(nucleus);GO:0006351(transcription, DNA-templated);GO:0006355(regulation of transcription, DNA-templated);GO:0009414(response to wa…	0.127994	undirected	-	ABF2
TRINITY_DN75269_c0_g1	-	-	TRINITY_DN80388_c0_g1	han04016(MAPK signaling pathway - plant);han04075(Plant hormone signal transduction)	GO:0004721(phosphoprotein phosphatase activity);GO:0004722(protein serine/threonine phosphatase activity);GO:0005515(protein binding);GO:0005634(nucleus);GO:0005737(cytoplasm);GO:0005829(cytosol);GO:0006470(protein dephosphorylation);GO:0009409(response to cold);GO:0009414(response to water deprivation);GO:0009737(response to abscisic acid);GO:0009738(abscisic acid-activated signaling pathway);GO…	0.168454	undirected	-	PP2CA
TRINITY_DN63365_c0_g1	-	-	TRINITY_DN80388_c0_g1	han04016(MAPK signaling pathway - plant);han04075(Plant hormone signal transduction)	GO:0004721(phosphoprotein phosphatase activity);GO:0004722(protein serine/threonine phosphatase activity);GO:0005515(protein binding);GO:0005634(nucleus);GO:0005737(cytoplasm);GO:0005829(cytosol);GO:0006470(protein dephosphorylation);GO:0009409(response to cold);GO:0009414(response to water deprivation);GO:0009737(response to abscisic acid);GO:0009738(abscisic acid-activated signaling pathway);GO…	0.167401	undirected	-	PP2CA
TRINITY_DN69631_c0_g1	-	GO:0005634(nucleus);GO:0006970(response to osmotic stress);GO:0009414(response to water deprivation);GO:0009651(response to salt stress);GO:0009737(response to abscisic acid);GO:0009738(abscisic acid-activated signaling pathway);GO:0010029(regulation of seed germination);GO:0010228(vegetative to reproductive phase transition of meristem)	TRINITY_DN80388_c0_g1	han04016(MAPK signaling pathway - plant);han04075(Plant hormone signal transduction)	GO:0004721(phosphoprotein phosphatase activity);GO:0004722(protein serine/threonine phosphatase activity);GO:0005515(protein binding);GO:0005634(nucleus);GO:0005737(cytoplasm);GO:0005829(cytosol);GO:0006470(protein dephosphorylation);GO:0009409(response to cold);GO:0009414(response to water deprivation);GO:0009737(response to abscisic acid);GO:0009738(abscisic acid-activated signaling pathway);GO…	0.140727	undirected	EDL3	PP2CA
TRINITY_DN72794_c2_g2	-	-	TRINITY_DN80388_c0_g1	han04016(MAPK signaling pathway - plant);han04075(Plant hormone signal transduction)	GO:0004721(phosphoprotein phosphatase activity);GO:0004722(protein serine/threonine phosphatase activity);GO:0005515(protein binding);GO:0005634(nucleus);GO:0005737(cytoplasm);GO:0005829(cytosol);GO:0006470(protein dephosphorylation);GO:0009409(response to cold);GO:0009414(response to water deprivation);GO:0009737(response to abscisic acid);GO:0009738(abscisic acid-activated signaling pathway);GO…	0.136644	undirected	UBI11	PP2CA
TRINITY_DN64920_c1_g4	han00500(Starch and sucrose metabolism)	GO:0005982(starch metabolic process);GO:0005985(sucrose metabolic process);GO:0005986(sucrose biosynthetic process);GO:0008194(UDP-glycosyltransferase activity);GO:0009414(response to water deprivation);GO:0009507(chloroplast);GO:0010431(seed maturation);GO:0010555(response to mannitol);GO:0016157(sucrose synthase activity);GO:0016757(transferase activity, transferring glycosyl groups)	TRINITY_DN80388_c0_g1	han04016(MAPK signaling pathway - plant);han04075(Plant hormone signal transduction)	GO:0004721(phosphoprotein phosphatase activity);GO:0004722(protein serine/threonine phosphatase activity);GO:0005515(protein binding);GO:0005634(nucleus);GO:0005737(cytoplasm);GO:0005829(cytosol);GO:0006470(protein dephosphorylation);GO:0009409(response to cold);GO:0009414(response to water deprivation);GO:0009737(response to abscisic acid);GO:0009738(abscisic acid-activated signaling pathway);GO…	0.135846	undirected	SUS2	PP2CA
TRINITY_DN83699_c2_g1	han00906(Carotenoid biosynthesis)	GO:0006970(response to osmotic stress);GO:0009414(response to water deprivation);GO:0009507(chloroplast);GO:0009535(chloroplast thylakoid membrane);GO:0009570(chloroplast stroma);GO:0009688(abscisic acid biosynthetic process);GO:0042538(hyperosmotic salinity response);GO:0045549(9-cis-epoxycarotenoid dioxygenase activity);GO:0046872(metal ion binding);GO:0055114(oxidation-reduction process)	TRINITY_DN80388_c0_g1	han04016(MAPK signaling pathway - plant);han04075(Plant hormone signal transduction)	GO:0004721(phosphoprotein phosphatase activity);GO:0004722(protein serine/threonine phosphatase activity);GO:0005515(protein binding);GO:0005634(nucleus);GO:0005737(cytoplasm);GO:0005829(cytosol);GO:0006470(protein dephosphorylation);GO:0009409(response to cold);GO:0009414(response to water deprivation);GO:0009737(response to abscisic acid);GO:0009738(abscisic acid-activated signaling pathway);GO…	0.130329	undirected	NCED3	PP2CA
TRINITY_DN59565_c0_g1	NA(NA)	GO:0004674(protein serine/threonine kinase activity);GO:0005524(ATP binding);GO:0005622(intracellular);GO:0005886(plasma membrane);GO:0016301(kinase activity);GO:0018105(peptidyl-serine phosphorylation);GO:0018107(peptidyl-threonine phosphorylation);GO:0035556(intracellular signal transduction)	TRINITY_DN80388_c0_g1	han04016(MAPK signaling pathway - plant);han04075(Plant hormone signal transduction)	GO:0004721(phosphoprotein phosphatase activity);GO:0004722(protein serine/threonine phosphatase activity);GO:0005515(protein binding);GO:0005634(nucleus);GO:0005737(cytoplasm);GO:0005829(cytosol);GO:0006470(protein dephosphorylation);GO:0009409(response to cold);GO:0009414(response to water deprivation);GO:0009737(response to abscisic acid);GO:0009738(abscisic acid-activated signaling pathway);GO…	0.130018	undirected	CIPK2	PP2CA
TRINITY_DN63131_c0_g2	-	-	TRINITY_DN80388_c0_g1	han04016(MAPK signaling pathway - plant);han04075(Plant hormone signal transduction)	GO:0004721(phosphoprotein phosphatase activity);GO:0004722(protein serine/threonine phosphatase activity);GO:0005515(protein binding);GO:0005634(nucleus);GO:0005737(cytoplasm);GO:0005829(cytosol);GO:0006470(protein dephosphorylation);GO:0009409(response to cold);GO:0009414(response to water deprivation);GO:0009737(response to abscisic acid);GO:0009738(abscisic acid-activated signaling pathway);GO…	0.128835	undirected	-	PP2CA
TRINITY_DN69337_c0_g2	NA(NA)	GO:0003677(DNA binding);GO:0003700(DNA binding transcription factor activity);GO:0005634(nucleus);GO:0006351(transcription, DNA-templated);GO:0006355(regulation of transcription, DNA-templated);GO:0009733(response to auxin);GO:0043565(sequence-specific DNA binding)	TRINITY_DN80388_c0_g1	han04016(MAPK signaling pathway - plant);han04075(Plant hormone signal transduction)	GO:0004721(phosphoprotein phosphatase activity);GO:0004722(protein serine/threonine phosphatase activity);GO:0005515(protein binding);GO:0005634(nucleus);GO:0005737(cytoplasm);GO:0005829(cytosol);GO:0006470(protein dephosphorylation);GO:0009409(response to cold);GO:0009414(response to water deprivation);GO:0009737(response to abscisic acid);GO:0009738(abscisic acid-activated signaling pathway);GO…	0.125651	undirected	ATHB-40	PP2CA
TRINITY_DN77392_c0_g3	-	-	TRINITY_DN80388_c0_g1	han04016(MAPK signaling pathway - plant);han04075(Plant hormone signal transduction)	GO:0004721(phosphoprotein phosphatase activity);GO:0004722(protein serine/threonine phosphatase activity);GO:0005515(protein binding);GO:0005634(nucleus);GO:0005737(cytoplasm);GO:0005829(cytosol);GO:0006470(protein dephosphorylation);GO:0009409(response to cold);GO:0009414(response to water deprivation);GO:0009737(response to abscisic acid);GO:0009738(abscisic acid-activated signaling pathway);GO…	0.123355	undirected	-	PP2CA
TRINITY_DN59232_c0_g9	han00330(Arginine and proline metabolism);han00410(beta-Alanine metabolism)	GO:0005634(nucleus);GO:0005777(peroxisome);GO:0006598(polyamine catabolic process);GO:0046208(spermine catabolic process);GO:0046592(polyamine oxidase activity);GO:0052901(spermine:oxygen oxidoreductase (spermidine-forming) activity);GO:0052902(spermidine:oxygen oxidoreductase (3-aminopropanal-forming) activity);GO:0052903(N1-acetylspermine:oxygen oxidoreductase (3-acetamidopropanal-forming) acti…	TRINITY_DN80388_c0_g1	han04016(MAPK signaling pathway - plant);han04075(Plant hormone signal transduction)	GO:0004721(phosphoprotein phosphatase activity);GO:0004722(protein serine/threonine phosphatase activity);GO:0005515(protein binding);GO:0005634(nucleus);GO:0005737(cytoplasm);GO:0005829(cytosol);GO:0006470(protein dephosphorylation);GO:0009409(response to cold);GO:0009414(response to water deprivation);GO:0009737(response to abscisic acid);GO:0009738(abscisic acid-activated signaling pathway);GO…	0.120444	undirected	PAO3	PP2CA
TRINITY_DN72466_c2_g1	-	-	TRINITY_DN80388_c0_g1	han04016(MAPK signaling pathway - plant);han04075(Plant hormone signal transduction)	GO:0004721(phosphoprotein phosphatase activity);GO:0004722(protein serine/threonine phosphatase activity);GO:0005515(protein binding);GO:0005634(nucleus);GO:0005737(cytoplasm);GO:0005829(cytosol);GO:0006470(protein dephosphorylation);GO:0009409(response to cold);GO:0009414(response to water deprivation);GO:0009737(response to abscisic acid);GO:0009738(abscisic acid-activated signaling pathway);GO…	0.119063	undirected	-	PP2CA
TRINITY_DN60084_c1_g1	-	-	TRINITY_DN80388_c0_g1	han04016(MAPK signaling pathway - plant);han04075(Plant hormone signal transduction)	GO:0004721(phosphoprotein phosphatase activity);GO:0004722(protein serine/threonine phosphatase activity);GO:0005515(protein binding);GO:0005634(nucleus);GO:0005737(cytoplasm);GO:0005829(cytosol);GO:0006470(protein dephosphorylation);GO:0009409(response to cold);GO:0009414(response to water deprivation);GO:0009737(response to abscisic acid);GO:0009738(abscisic acid-activated signaling pathway);GO…	0.119006	undirected	-	PP2CA
TRINITY_DN56385_c0_g1	-	-	TRINITY_DN80388_c0_g1	han04016(MAPK signaling pathway - plant);han04075(Plant hormone signal transduction)	GO:0004721(phosphoprotein phosphatase activity);GO:0004722(protein serine/threonine phosphatase activity);GO:0005515(protein binding);GO:0005634(nucleus);GO:0005737(cytoplasm);GO:0005829(cytosol);GO:0006470(protein dephosphorylation);GO:0009409(response to cold);GO:0009414(response to water deprivation);GO:0009737(response to abscisic acid);GO:0009738(abscisic acid-activated signaling pathway);GO…	0.113666	undirected	-	PP2CA
TRINITY_DN67524_c0_g1	cic04145(Phagosome)	GO:0003924(GTPase activity);GO:0005200(structural constituent of cytoskeleton);GO:0005515(protein binding);GO:0005525(GTP binding);GO:0005737(cytoplasm);GO:0005794(Golgi apparatus);GO:0005874(microtubule);GO:0007017(microtubule-based process);GO:0009651(response to salt stress);GO:0016020(membrane);GO:0045298(tubulin complex)	TRINITY_DN80388_c0_g1	han04016(MAPK signaling pathway - plant);han04075(Plant hormone signal transduction)	GO:0004721(phosphoprotein phosphatase activity);GO:0004722(protein serine/threonine phosphatase activity);GO:0005515(protein binding);GO:0005634(nucleus);GO:0005737(cytoplasm);GO:0005829(cytosol);GO:0006470(protein dephosphorylation);GO:0009409(response to cold);GO:0009414(response to water deprivation);GO:0009737(response to abscisic acid);GO:0009738(abscisic acid-activated signaling pathway);GO…	0.11276	undirected	TUBB8	PP2CA
TRINITY_DN79160_c0_g2	NA(NA)	GO:0005634(nucleus);GO:0008270(zinc ion binding)	TRINITY_DN80388_c0_g1	han04016(MAPK signaling pathway - plant);han04075(Plant hormone signal transduction)	GO:0004721(phosphoprotein phosphatase activity);GO:0004722(protein serine/threonine phosphatase activity);GO:0005515(protein binding);GO:0005634(nucleus);GO:0005737(cytoplasm);GO:0005829(cytosol);GO:0006470(protein dephosphorylation);GO:0009409(response to cold);GO:0009414(response to water deprivation);GO:0009737(response to abscisic acid);GO:0009738(abscisic acid-activated signaling pathway);GO…	0.107503	undirected	HIP1	PP2CA
TRINITY_DN80568_c0_g1	egu00564(Glycerophospholipid metabolism)	GO:0004607(phosphatidylcholine-sterol O-acyltransferase activity);GO:0005576(extracellular region);GO:0005783(endoplasmic reticulum);GO:0006629(lipid metabolic process);GO:0008374(O-acyltransferase activity);GO:0008970(phosphatidylcholine 1-acylhydrolase activity);GO:0016042(lipid catabolic process);GO:0031090(organelle membrane);GO:0052739(phosphatidylserine 1-acylhydrolase activity);GO:0052740(…	TRINITY_DN80388_c0_g1	han04016(MAPK signaling pathway - plant);han04075(Plant hormone signal transduction)	GO:0004721(phosphoprotein phosphatase activity);GO:0004722(protein serine/threonine phosphatase activity);GO:0005515(protein binding);GO:0005634(nucleus);GO:0005737(cytoplasm);GO:0005829(cytosol);GO:0006470(protein dephosphorylation);GO:0009409(response to cold);GO:0009414(response to water deprivation);GO:0009737(response to abscisic acid);GO:0009738(abscisic acid-activated signaling pathway);GO…	0.105616	undirected	LCAT3	PP2CA
TRINITY_DN64522_c2_g2	-	-	TRINITY_DN80388_c0_g1	han04016(MAPK signaling pathway - plant);han04075(Plant hormone signal transduction)	GO:0004721(phosphoprotein phosphatase activity);GO:0004722(protein serine/threonine phosphatase activity);GO:0005515(protein binding);GO:0005634(nucleus);GO:0005737(cytoplasm);GO:0005829(cytosol);GO:0006470(protein dephosphorylation);GO:0009409(response to cold);GO:0009414(response to water deprivation);GO:0009737(response to abscisic acid);GO:0009738(abscisic acid-activated signaling pathway);GO…	0.104684	undirected	-	PP2CA
TRINITY_DN65508_c1_g1	-	-	TRINITY_DN80388_c0_g1	han04016(MAPK signaling pathway - plant);han04075(Plant hormone signal transduction)	GO:0004721(phosphoprotein phosphatase activity);GO:0004722(protein serine/threonine phosphatase activity);GO:0005515(protein binding);GO:0005634(nucleus);GO:0005737(cytoplasm);GO:0005829(cytosol);GO:0006470(protein dephosphorylation);GO:0009409(response to cold);GO:0009414(response to water deprivation);GO:0009737(response to abscisic acid);GO:0009738(abscisic acid-activated signaling pathway);GO…	0.103754	undirected	-	PP2CA
TRINITY_DN60464_c0_g1	-	-	TRINITY_DN80388_c0_g1	han04016(MAPK signaling pathway - plant);han04075(Plant hormone signal transduction)	GO:0004721(phosphoprotein phosphatase activity);GO:0004722(protein serine/threonine phosphatase activity);GO:0005515(protein binding);GO:0005634(nucleus);GO:0005737(cytoplasm);GO:0005829(cytosol);GO:0006470(protein dephosphorylation);GO:0009409(response to cold);GO:0009414(response to water deprivation);GO:0009737(response to abscisic acid);GO:0009738(abscisic acid-activated signaling pathway);GO…	0.103211	undirected	-	PP2CA
TRINITY_DN82852_c0_g1	NA(NA)	GO:0000977(RNA polymerase II regulatory region sequence-specific DNA binding);GO:0003700(DNA binding transcription factor activity);GO:0005515(protein binding);GO:0005634(nucleus);GO:0005829(cytosol);GO:0006351(transcription, DNA-templated);GO:0006355(regulation of transcription, DNA-templated);GO:0009737(response to abscisic acid);GO:0043565(sequence-specific DNA binding);GO:0044212(transcriptio…	TRINITY_DN78705_c0_g1	han04016(MAPK signaling pathway - plant);han04075(Plant hormone signal transduction)	GO:0004721(phosphoprotein phosphatase activity);GO:0004722(protein serine/threonine phosphatase activity);GO:0005515(protein binding);GO:0005634(nucleus);GO:0005737(cytoplasm);GO:0005829(cytosol);GO:0006470(protein dephosphorylation);GO:0009409(response to cold);GO:0009414(response to water deprivation);GO:0009737(response to abscisic acid);GO:0009738(abscisic acid-activated signaling pathway);GO…	0.171506	undirected	CPRF1	PP2CA
TRINITY_DN83699_c2_g1	han00906(Carotenoid biosynthesis)	GO:0006970(response to osmotic stress);GO:0009414(response to water deprivation);GO:0009507(chloroplast);GO:0009535(chloroplast thylakoid membrane);GO:0009570(chloroplast stroma);GO:0009688(abscisic acid biosynthetic process);GO:0042538(hyperosmotic salinity response);GO:0045549(9-cis-epoxycarotenoid dioxygenase activity);GO:0046872(metal ion binding);GO:0055114(oxidation-reduction process)	TRINITY_DN78705_c0_g1	han04016(MAPK signaling pathway - plant);han04075(Plant hormone signal transduction)	GO:0004721(phosphoprotein phosphatase activity);GO:0004722(protein serine/threonine phosphatase activity);GO:0005515(protein binding);GO:0005634(nucleus);GO:0005737(cytoplasm);GO:0005829(cytosol);GO:0006470(protein dephosphorylation);GO:0009409(response to cold);GO:0009414(response to water deprivation);GO:0009737(response to abscisic acid);GO:0009738(abscisic acid-activated signaling pathway);GO…	0.154597	undirected	NCED3	PP2CA
TRINITY_DN76037_c0_g3	han04016(MAPK signaling pathway - plant);han04075(Plant hormone signal transduction)	GO:0004722(protein serine/threonine phosphatase activity);GO:0005886(plasma membrane);GO:0006470(protein dephosphorylation);GO:0046872(metal ion binding)	TRINITY_DN78705_c0_g1	han04016(MAPK signaling pathway - plant);han04075(Plant hormone signal transduction)	GO:0004721(phosphoprotein phosphatase activity);GO:0004722(protein serine/threonine phosphatase activity);GO:0005515(protein binding);GO:0005634(nucleus);GO:0005737(cytoplasm);GO:0005829(cytosol);GO:0006470(protein dephosphorylation);GO:0009409(response to cold);GO:0009414(response to water deprivation);GO:0009737(response to abscisic acid);GO:0009738(abscisic acid-activated signaling pathway);GO…	0.144799	undirected	At2g29380	PP2CA
TRINITY_DN74340_c0_g1	NA(NA)	GO:0005634(nucleus);GO:0005737(cytoplasm)	TRINITY_DN78705_c0_g1	han04016(MAPK signaling pathway - plant);han04075(Plant hormone signal transduction)	GO:0004721(phosphoprotein phosphatase activity);GO:0004722(protein serine/threonine phosphatase activity);GO:0005515(protein binding);GO:0005634(nucleus);GO:0005737(cytoplasm);GO:0005829(cytosol);GO:0006470(protein dephosphorylation);GO:0009409(response to cold);GO:0009414(response to water deprivation);GO:0009737(response to abscisic acid);GO:0009738(abscisic acid-activated signaling pathway);GO…	0.142982	undirected	PUB13	PP2CA
TRINITY_DN70712_c0_g1	hbr04016(MAPK signaling pathway - plant)	GO:0005737(cytoplasm)	TRINITY_DN78705_c0_g1	han04016(MAPK signaling pathway - plant);han04075(Plant hormone signal transduction)	GO:0004721(phosphoprotein phosphatase activity);GO:0004722(protein serine/threonine phosphatase activity);GO:0005515(protein binding);GO:0005634(nucleus);GO:0005737(cytoplasm);GO:0005829(cytosol);GO:0006470(protein dephosphorylation);GO:0009409(response to cold);GO:0009414(response to water deprivation);GO:0009737(response to abscisic acid);GO:0009738(abscisic acid-activated signaling pathway);GO…	0.139539	undirected	mkkA	PP2CA
TRINITY_DN63365_c0_g1	-	-	TRINITY_DN78705_c0_g1	han04016(MAPK signaling pathway - plant);han04075(Plant hormone signal transduction)	GO:0004721(phosphoprotein phosphatase activity);GO:0004722(protein serine/threonine phosphatase activity);GO:0005515(protein binding);GO:0005634(nucleus);GO:0005737(cytoplasm);GO:0005829(cytosol);GO:0006470(protein dephosphorylation);GO:0009409(response to cold);GO:0009414(response to water deprivation);GO:0009737(response to abscisic acid);GO:0009738(abscisic acid-activated signaling pathway);GO…	0.137258	undirected	-	PP2CA
TRINITY_DN76573_c0_g1	NA(NA)	GO:0005634(nucleus);GO:0005737(cytoplasm);GO:0006952(defense response);GO:0016740(transferase activity);GO:0043067(regulation of programmed cell death);GO:0043161(proteasome-mediated ubiquitin-dependent protein catabolic process);GO:0046872(metal ion binding)	TRINITY_DN78705_c0_g1	han04016(MAPK signaling pathway - plant);han04075(Plant hormone signal transduction)	GO:0004721(phosphoprotein phosphatase activity);GO:0004722(protein serine/threonine phosphatase activity);GO:0005515(protein binding);GO:0005634(nucleus);GO:0005737(cytoplasm);GO:0005829(cytosol);GO:0006470(protein dephosphorylation);GO:0009409(response to cold);GO:0009414(response to water deprivation);GO:0009737(response to abscisic acid);GO:0009738(abscisic acid-activated signaling pathway);GO…	0.131934	undirected	BRG3	PP2CA
TRINITY_DN69631_c0_g1	-	GO:0005634(nucleus);GO:0006970(response to osmotic stress);GO:0009414(response to water deprivation);GO:0009651(response to salt stress);GO:0009737(response to abscisic acid);GO:0009738(abscisic acid-activated signaling pathway);GO:0010029(regulation of seed germination);GO:0010228(vegetative to reproductive phase transition of meristem)	TRINITY_DN78705_c0_g1	han04016(MAPK signaling pathway - plant);han04075(Plant hormone signal transduction)	GO:0004721(phosphoprotein phosphatase activity);GO:0004722(protein serine/threonine phosphatase activity);GO:0005515(protein binding);GO:0005634(nucleus);GO:0005737(cytoplasm);GO:0005829(cytosol);GO:0006470(protein dephosphorylation);GO:0009409(response to cold);GO:0009414(response to water deprivation);GO:0009737(response to abscisic acid);GO:0009738(abscisic acid-activated signaling pathway);GO…	0.130644	undirected	EDL3	PP2CA
TRINITY_DN67560_c0_g1	han00940(Phenylpropanoid biosynthesis)	GO:0005737(cytoplasm);GO:0008270(zinc ion binding);GO:0009809(lignin biosynthetic process);GO:0045551(cinnamyl-alcohol dehydrogenase activity);GO:0052747(sinapyl alcohol dehydrogenase activity);GO:0055114(oxidation-reduction process);GO:0080167(response to karrikin)	TRINITY_DN78705_c0_g1	han04016(MAPK signaling pathway - plant);han04075(Plant hormone signal transduction)	GO:0004721(phosphoprotein phosphatase activity);GO:0004722(protein serine/threonine phosphatase activity);GO:0005515(protein binding);GO:0005634(nucleus);GO:0005737(cytoplasm);GO:0005829(cytosol);GO:0006470(protein dephosphorylation);GO:0009409(response to cold);GO:0009414(response to water deprivation);GO:0009737(response to abscisic acid);GO:0009738(abscisic acid-activated signaling pathway);GO…	0.126757	undirected	CAD1	PP2CA
TRINITY_DN78440_c0_g1	NA(NA)	GO:0004722(protein serine/threonine phosphatase activity);GO:0006470(protein dephosphorylation);GO:0046872(metal ion binding)	TRINITY_DN78705_c0_g1	han04016(MAPK signaling pathway - plant);han04075(Plant hormone signal transduction)	GO:0004721(phosphoprotein phosphatase activity);GO:0004722(protein serine/threonine phosphatase activity);GO:0005515(protein binding);GO:0005634(nucleus);GO:0005737(cytoplasm);GO:0005829(cytosol);GO:0006470(protein dephosphorylation);GO:0009409(response to cold);GO:0009414(response to water deprivation);GO:0009737(response to abscisic acid);GO:0009738(abscisic acid-activated signaling pathway);GO…	0.12412	undirected	At4g38520	PP2CA
TRINITY_DN57331_c0_g1	-	-	TRINITY_DN78705_c0_g1	han04016(MAPK signaling pathway - plant);han04075(Plant hormone signal transduction)	GO:0004721(phosphoprotein phosphatase activity);GO:0004722(protein serine/threonine phosphatase activity);GO:0005515(protein binding);GO:0005634(nucleus);GO:0005737(cytoplasm);GO:0005829(cytosol);GO:0006470(protein dephosphorylation);GO:0009409(response to cold);GO:0009414(response to water deprivation);GO:0009737(response to abscisic acid);GO:0009738(abscisic acid-activated signaling pathway);GO…	0.123994	undirected	-	PP2CA
TRINITY_DN65199_c0_g3	-	-	TRINITY_DN78705_c0_g1	han04016(MAPK signaling pathway - plant);han04075(Plant hormone signal transduction)	GO:0004721(phosphoprotein phosphatase activity);GO:0004722(protein serine/threonine phosphatase activity);GO:0005515(protein binding);GO:0005634(nucleus);GO:0005737(cytoplasm);GO:0005829(cytosol);GO:0006470(protein dephosphorylation);GO:0009409(response to cold);GO:0009414(response to water deprivation);GO:0009737(response to abscisic acid);GO:0009738(abscisic acid-activated signaling pathway);GO…	0.122178	undirected	-	PP2CA
TRINITY_DN75269_c0_g1	-	-	TRINITY_DN78705_c0_g1	han04016(MAPK signaling pathway - plant);han04075(Plant hormone signal transduction)	GO:0004721(phosphoprotein phosphatase activity);GO:0004722(protein serine/threonine phosphatase activity);GO:0005515(protein binding);GO:0005634(nucleus);GO:0005737(cytoplasm);GO:0005829(cytosol);GO:0006470(protein dephosphorylation);GO:0009409(response to cold);GO:0009414(response to water deprivation);GO:0009737(response to abscisic acid);GO:0009738(abscisic acid-activated signaling pathway);GO…	0.120765	undirected	-	PP2CA
TRINITY_DN78269_c1_g1	-	-	TRINITY_DN78705_c0_g1	han04016(MAPK signaling pathway - plant);han04075(Plant hormone signal transduction)	GO:0004721(phosphoprotein phosphatase activity);GO:0004722(protein serine/threonine phosphatase activity);GO:0005515(protein binding);GO:0005634(nucleus);GO:0005737(cytoplasm);GO:0005829(cytosol);GO:0006470(protein dephosphorylation);GO:0009409(response to cold);GO:0009414(response to water deprivation);GO:0009737(response to abscisic acid);GO:0009738(abscisic acid-activated signaling pathway);GO…	0.113487	undirected	UBI11	PP2CA
TRINITY_DN86324_c0_g1	NA(NA)	GO:0003333(amino acid transmembrane transport);GO:0005886(plasma membrane);GO:0015171(amino acid transmembrane transporter activity)	TRINITY_DN78705_c0_g1	han04016(MAPK signaling pathway - plant);han04075(Plant hormone signal transduction)	GO:0004721(phosphoprotein phosphatase activity);GO:0004722(protein serine/threonine phosphatase activity);GO:0005515(protein binding);GO:0005634(nucleus);GO:0005737(cytoplasm);GO:0005829(cytosol);GO:0006470(protein dephosphorylation);GO:0009409(response to cold);GO:0009414(response to water deprivation);GO:0009737(response to abscisic acid);GO:0009738(abscisic acid-activated signaling pathway);GO…	0.113078	undirected	AAP3	PP2CA
TRINITY_DN72140_c0_g1	NA(NA)	GO:0005634(nucleus);GO:0005737(cytoplasm)	TRINITY_DN78705_c0_g1	han04016(MAPK signaling pathway - plant);han04075(Plant hormone signal transduction)	GO:0004721(phosphoprotein phosphatase activity);GO:0004722(protein serine/threonine phosphatase activity);GO:0005515(protein binding);GO:0005634(nucleus);GO:0005737(cytoplasm);GO:0005829(cytosol);GO:0006470(protein dephosphorylation);GO:0009409(response to cold);GO:0009414(response to water deprivation);GO:0009737(response to abscisic acid);GO:0009738(abscisic acid-activated signaling pathway);GO…	0.112383	undirected	PUB9	PP2CA
TRINITY_DN64211_c0_g4	-	GO:0005634(nucleus);GO:0008150(biological_process);GO:0046872(metal ion binding)	TRINITY_DN78705_c0_g1	han04016(MAPK signaling pathway - plant);han04075(Plant hormone signal transduction)	GO:0004721(phosphoprotein phosphatase activity);GO:0004722(protein serine/threonine phosphatase activity);GO:0005515(protein binding);GO:0005634(nucleus);GO:0005737(cytoplasm);GO:0005829(cytosol);GO:0006470(protein dephosphorylation);GO:0009409(response to cold);GO:0009414(response to water deprivation);GO:0009737(response to abscisic acid);GO:0009738(abscisic acid-activated signaling pathway);GO…	0.112258	undirected	At4g27745	PP2CA
TRINITY_DN78238_c0_g1	NA(NA)	GO:0003700(DNA binding transcription factor activity);GO:0005634(nucleus);GO:0006351(transcription, DNA-templated);GO:0006355(regulation of transcription, DNA-templated);GO:0009637(response to blue light);GO:0030308(negative regulation of cell growth);GO:0043565(sequence-specific DNA binding);GO:0045893(positive regulation of transcription, DNA-templated);GO:0048510(regulation of timing of transi…	TRINITY_DN78705_c0_g1	han04016(MAPK signaling pathway - plant);han04075(Plant hormone signal transduction)	GO:0004721(phosphoprotein phosphatase activity);GO:0004722(protein serine/threonine phosphatase activity);GO:0005515(protein binding);GO:0005634(nucleus);GO:0005737(cytoplasm);GO:0005829(cytosol);GO:0006470(protein dephosphorylation);GO:0009409(response to cold);GO:0009414(response to water deprivation);GO:0009737(response to abscisic acid);GO:0009738(abscisic acid-activated signaling pathway);GO…	0.109866	undirected	ATHB-16	PP2CA
TRINITY_DN62335_c0_g1	-	-	TRINITY_DN78705_c0_g1	han04016(MAPK signaling pathway - plant);han04075(Plant hormone signal transduction)	GO:0004721(phosphoprotein phosphatase activity);GO:0004722(protein serine/threonine phosphatase activity);GO:0005515(protein binding);GO:0005634(nucleus);GO:0005737(cytoplasm);GO:0005829(cytosol);GO:0006470(protein dephosphorylation);GO:0009409(response to cold);GO:0009414(response to water deprivation);GO:0009737(response to abscisic acid);GO:0009738(abscisic acid-activated signaling pathway);GO…	0.10899	undirected	-	PP2CA
TRINITY_DN64920_c1_g4	han00500(Starch and sucrose metabolism)	GO:0005982(starch metabolic process);GO:0005985(sucrose metabolic process);GO:0005986(sucrose biosynthetic process);GO:0008194(UDP-glycosyltransferase activity);GO:0009414(response to water deprivation);GO:0009507(chloroplast);GO:0010431(seed maturation);GO:0010555(response to mannitol);GO:0016157(sucrose synthase activity);GO:0016757(transferase activity, transferring glycosyl groups)	TRINITY_DN78705_c0_g1	han04016(MAPK signaling pathway - plant);han04075(Plant hormone signal transduction)	GO:0004721(phosphoprotein phosphatase activity);GO:0004722(protein serine/threonine phosphatase activity);GO:0005515(protein binding);GO:0005634(nucleus);GO:0005737(cytoplasm);GO:0005829(cytosol);GO:0006470(protein dephosphorylation);GO:0009409(response to cold);GO:0009414(response to water deprivation);GO:0009737(response to abscisic acid);GO:0009738(abscisic acid-activated signaling pathway);GO…	0.106914	undirected	SUS2	PP2CA

## Sheet: brown
fromNode	KEGG_Pathway	GO_Term	toNode	KEGG_Pathway	GO_Term	weight	direction	fromAltName	toAltName
TRINITY_DN70711_c1_g3	boe00562(Inositol phosphate metabolism);boe04070(Phosphatidylinositol signaling system)	GO:0003677(DNA binding);GO:0009295(nucleoid);GO:0009507(chloroplast);GO:0009508(plastid chromosome);GO:0009534(chloroplast thylakoid);GO:0009535(chloroplast thylakoid membrane);GO:0009579(thylakoid);GO:0009737(response to abscisic acid);GO:0009773(photosynthetic electron transport in photosystem I);GO:0009941(chloroplast envelope);GO:0016021(integral component of membrane);GO:0030093(chloroplast …	TRINITY_DN77681_c0_g1	han04075(Plant hormone signal transduction)	GO:0003700(DNA binding transcription factor activity);GO:0005515(protein binding);GO:0005634(nucleus);GO:0006351(transcription, DNA-templated);GO:0006355(regulation of transcription, DNA-templated);GO:0009734(auxin-activated signaling pathway);GO:0043565(sequence-specific DNA binding)	0.188975	undirected	CURT1B	ARF9
TRINITY_DN58564_c0_g5	-	-	TRINITY_DN77681_c0_g1	han04075(Plant hormone signal transduction)	GO:0003700(DNA binding transcription factor activity);GO:0005515(protein binding);GO:0005634(nucleus);GO:0006351(transcription, DNA-templated);GO:0006355(regulation of transcription, DNA-templated);GO:0009734(auxin-activated signaling pathway);GO:0043565(sequence-specific DNA binding)	0.177785	undirected	-	ARF9
TRINITY_DN55403_c0_g1	han00860(Porphyrin and chlorophyll metabolism)	GO:0005515(protein binding);GO:0005524(ATP binding);GO:0005739(mitochondrion);GO:0009507(chloroplast);GO:0009570(chloroplast stroma);GO:0009706(chloroplast inner membrane);GO:0010007(magnesium chelatase complex);GO:0015979(photosynthesis);GO:0015995(chlorophyll biosynthetic process);GO:0016851(magnesium chelatase activity)	TRINITY_DN77681_c0_g1	han04075(Plant hormone signal transduction)	GO:0003700(DNA binding transcription factor activity);GO:0005515(protein binding);GO:0005634(nucleus);GO:0006351(transcription, DNA-templated);GO:0006355(regulation of transcription, DNA-templated);GO:0009734(auxin-activated signaling pathway);GO:0043565(sequence-specific DNA binding)	0.171827	undirected	CHLH	ARF9
TRINITY_DN78884_c0_g1	-	-	TRINITY_DN77681_c0_g1	han04075(Plant hormone signal transduction)	GO:0003700(DNA binding transcription factor activity);GO:0005515(protein binding);GO:0005634(nucleus);GO:0006351(transcription, DNA-templated);GO:0006355(regulation of transcription, DNA-templated);GO:0009734(auxin-activated signaling pathway);GO:0043565(sequence-specific DNA binding)	0.168372	undirected	-	ARF9
TRINITY_DN85667_c0_g1	-	GO:0005737(cytoplasm);GO:0008150(biological_process)	TRINITY_DN77681_c0_g1	han04075(Plant hormone signal transduction)	GO:0003700(DNA binding transcription factor activity);GO:0005515(protein binding);GO:0005634(nucleus);GO:0006351(transcription, DNA-templated);GO:0006355(regulation of transcription, DNA-templated);GO:0009734(auxin-activated signaling pathway);GO:0043565(sequence-specific DNA binding)	0.168017	undirected	TOR1L3	ARF9
TRINITY_DN61161_c0_g1	han00630(Glyoxylate and dicarboxylate metabolism);han00250(Alanine, aspartate and glutamate metabolism);han00260(Glycine, serine and threonine metabolism);han04146(Peroxisome)	GO:0004760(serine-pyruvate transaminase activity);GO:0005777(peroxisome);GO:0005886(plasma membrane);GO:0008453(alanine-glyoxylate transaminase activity);GO:0009507(chloroplast);GO:0009570(chloroplast stroma);GO:0009853(photorespiration);GO:0016020(membrane);GO:0019265(glycine biosynthetic process, by transamination of glyoxylate);GO:0048046(apoplast);GO:0050281(serine-glyoxylate transaminase act…	TRINITY_DN77681_c0_g1	han04075(Plant hormone signal transduction)	GO:0003700(DNA binding transcription factor activity);GO:0005515(protein binding);GO:0005634(nucleus);GO:0006351(transcription, DNA-templated);GO:0006355(regulation of transcription, DNA-templated);GO:0009734(auxin-activated signaling pathway);GO:0043565(sequence-specific DNA binding)	0.166605	undirected	AGT1	ARF9
TRINITY_DN77960_c2_g2	-	-	TRINITY_DN77681_c0_g1	han04075(Plant hormone signal transduction)	GO:0003700(DNA binding transcription factor activity);GO:0005515(protein binding);GO:0005634(nucleus);GO:0006351(transcription, DNA-templated);GO:0006355(regulation of transcription, DNA-templated);GO:0009734(auxin-activated signaling pathway);GO:0043565(sequence-specific DNA binding)	0.162441	undirected	-	ARF9
TRINITY_DN78023_c0_g1	-	-	TRINITY_DN77681_c0_g1	han04075(Plant hormone signal transduction)	GO:0003700(DNA binding transcription factor activity);GO:0005515(protein binding);GO:0005634(nucleus);GO:0006351(transcription, DNA-templated);GO:0006355(regulation of transcription, DNA-templated);GO:0009734(auxin-activated signaling pathway);GO:0043565(sequence-specific DNA binding)	0.161721	undirected	-	ARF9
TRINITY_DN65469_c1_g1	-	-	TRINITY_DN77681_c0_g1	han04075(Plant hormone signal transduction)	GO:0003700(DNA binding transcription factor activity);GO:0005515(protein binding);GO:0005634(nucleus);GO:0006351(transcription, DNA-templated);GO:0006355(regulation of transcription, DNA-templated);GO:0009734(auxin-activated signaling pathway);GO:0043565(sequence-specific DNA binding)	0.159875	undirected	-	ARF9
TRINITY_DN81324_c0_g1	-	-	TRINITY_DN77681_c0_g1	han04075(Plant hormone signal transduction)	GO:0003700(DNA binding transcription factor activity);GO:0005515(protein binding);GO:0005634(nucleus);GO:0006351(transcription, DNA-templated);GO:0006355(regulation of transcription, DNA-templated);GO:0009734(auxin-activated signaling pathway);GO:0043565(sequence-specific DNA binding)	0.15976	undirected	-	ARF9
TRINITY_DN74495_c1_g2	-	-	TRINITY_DN77681_c0_g1	han04075(Plant hormone signal transduction)	GO:0003700(DNA binding transcription factor activity);GO:0005515(protein binding);GO:0005634(nucleus);GO:0006351(transcription, DNA-templated);GO:0006355(regulation of transcription, DNA-templated);GO:0009734(auxin-activated signaling pathway);GO:0043565(sequence-specific DNA binding)	0.15833	undirected	-	ARF9
TRINITY_DN85073_c1_g1	NA(NA)	GO:0005887(integral component of plasma membrane);GO:0009705(plant-type vacuole membrane);GO:0009992(cellular water homeostasis);GO:0015250(water channel activity);GO:0015254(glycerol channel activity);GO:0034220(ion transmembrane transport);GO:0042807(central vacuole)	TRINITY_DN77681_c0_g1	han04075(Plant hormone signal transduction)	GO:0003700(DNA binding transcription factor activity);GO:0005515(protein binding);GO:0005634(nucleus);GO:0006351(transcription, DNA-templated);GO:0006355(regulation of transcription, DNA-templated);GO:0009734(auxin-activated signaling pathway);GO:0043565(sequence-specific DNA binding)	0.157185	undirected	TIP4-1	ARF9
TRINITY_DN78070_c1_g1	-	-	TRINITY_DN77681_c0_g1	han04075(Plant hormone signal transduction)	GO:0003700(DNA binding transcription factor activity);GO:0005515(protein binding);GO:0005634(nucleus);GO:0006351(transcription, DNA-templated);GO:0006355(regulation of transcription, DNA-templated);GO:0009734(auxin-activated signaling pathway);GO:0043565(sequence-specific DNA binding)	0.15536	undirected	-	ARF9
TRINITY_DN84926_c1_g2	mtr03040(Spliceosome);mtr04141(Protein processing in endoplasmic reticulum);mtr04144(Endocytosis)	-	TRINITY_DN77681_c0_g1	han04075(Plant hormone signal transduction)	GO:0003700(DNA binding transcription factor activity);GO:0005515(protein binding);GO:0005634(nucleus);GO:0006351(transcription, DNA-templated);GO:0006355(regulation of transcription, DNA-templated);GO:0009734(auxin-activated signaling pathway);GO:0043565(sequence-specific DNA binding)	0.152282	undirected	HSP70	ARF9
TRINITY_DN65756_c0_g1	-	-	TRINITY_DN77681_c0_g1	han04075(Plant hormone signal transduction)	GO:0003700(DNA binding transcription factor activity);GO:0005515(protein binding);GO:0005634(nucleus);GO:0006351(transcription, DNA-templated);GO:0006355(regulation of transcription, DNA-templated);GO:0009734(auxin-activated signaling pathway);GO:0043565(sequence-specific DNA binding)	0.151362	undirected	-	ARF9
TRINITY_DN62856_c0_g5	-	-	TRINITY_DN77681_c0_g1	han04075(Plant hormone signal transduction)	GO:0003700(DNA binding transcription factor activity);GO:0005515(protein binding);GO:0005634(nucleus);GO:0006351(transcription, DNA-templated);GO:0006355(regulation of transcription, DNA-templated);GO:0009734(auxin-activated signaling pathway);GO:0043565(sequence-specific DNA binding)	0.14804	undirected	-	ARF9
TRINITY_DN69725_c0_g4	han00196(Photosynthesis - antenna proteins)	GO:0005515(protein binding);GO:0009409(response to cold);GO:0009507(chloroplast);GO:0009522(photosystem I);GO:0009534(chloroplast thylakoid);GO:0009535(chloroplast thylakoid membrane);GO:0009579(thylakoid);GO:0009644(response to high light intensity);GO:0009645(response to low light intensity stimulus);GO:0009768(photosynthesis, light harvesting in photosystem I);GO:0009782(photosystem I antenna …	TRINITY_DN77681_c0_g1	han04075(Plant hormone signal transduction)	GO:0003700(DNA binding transcription factor activity);GO:0005515(protein binding);GO:0005634(nucleus);GO:0006351(transcription, DNA-templated);GO:0006355(regulation of transcription, DNA-templated);GO:0009734(auxin-activated signaling pathway);GO:0043565(sequence-specific DNA binding)	0.146594	undirected	LHCA2	ARF9
TRINITY_DN79319_c0_g5	-	-	TRINITY_DN77681_c0_g1	han04075(Plant hormone signal transduction)	GO:0003700(DNA binding transcription factor activity);GO:0005515(protein binding);GO:0005634(nucleus);GO:0006351(transcription, DNA-templated);GO:0006355(regulation of transcription, DNA-templated);GO:0009734(auxin-activated signaling pathway);GO:0043565(sequence-specific DNA binding)	0.146573	undirected	-	ARF9
TRINITY_DN61317_c1_g5	-	-	TRINITY_DN77681_c0_g1	han04075(Plant hormone signal transduction)	GO:0003700(DNA binding transcription factor activity);GO:0005515(protein binding);GO:0005634(nucleus);GO:0006351(transcription, DNA-templated);GO:0006355(regulation of transcription, DNA-templated);GO:0009734(auxin-activated signaling pathway);GO:0043565(sequence-specific DNA binding)	0.146353	undirected	-	ARF9
TRINITY_DN59536_c0_g6	-	-	TRINITY_DN77681_c0_g1	han04075(Plant hormone signal transduction)	GO:0003700(DNA binding transcription factor activity);GO:0005515(protein binding);GO:0005634(nucleus);GO:0006351(transcription, DNA-templated);GO:0006355(regulation of transcription, DNA-templated);GO:0009734(auxin-activated signaling pathway);GO:0043565(sequence-specific DNA binding)	0.145886	undirected	-	ARF9
TRINITY_DN81643_c0_g7	-	GO:0005739(mitochondrion);GO:0009651(response to salt stress);GO:0045454(cell redox homeostasis);GO:0050897(cobalt ion binding)	TRINITY_DN65087_c0_g12	vvi04016(MAPK signaling pathway - plant);vvi04075(Plant hormone signal transduction)		0.276049	undirected	CBSX3	-
TRINITY_DN59536_c0_g6	-	-	TRINITY_DN65087_c0_g12	vvi04016(MAPK signaling pathway - plant);vvi04075(Plant hormone signal transduction)	-	0.267853	undirected	-	-
TRINITY_DN64068_c1_g2	NA(NA)	GO:0005576(extracellular region);GO:0005618(cell wall);GO:0006949(syncytium formation);GO:0009664(plant-type cell wall organization);GO:0009826(unidimensional cell growth);GO:0009828(plant-type cell wall loosening);GO:0009831(plant-type cell wall modification involved in multidimensional cell growth);GO:0016020(membrane)	TRINITY_DN65087_c0_g12	vvi04016(MAPK signaling pathway - plant);vvi04075(Plant hormone signal transduction)	-	0.257105	undirected	EXPA8	-
TRINITY_DN78353_c0_g2	-	GO:0005576(extracellular region);GO:0005886(plasma membrane);GO:0016787(hydrolase activity)	TRINITY_DN65087_c0_g12	vvi04016(MAPK signaling pathway - plant);vvi04075(Plant hormone signal transduction)	-	0.247442	undirected	ABHD17C	-
TRINITY_DN81136_c0_g1	-	GO:0000302(response to reactive oxygen species);GO:0006952(defense response);GO:0007049(cell cycle);GO:0007275(multicellular organism development);GO:0009507(chloroplast);GO:0009707(chloroplast outer membrane);GO:0010020(chloroplast fission);GO:0016021(integral component of membrane);GO:0016829(lyase activity);GO:0017009(protein-phycocyanobilin linkage);GO:0043572(plastid fission);GO:0046741(tran…	TRINITY_DN65087_c0_g12	vvi04016(MAPK signaling pathway - plant);vvi04075(Plant hormone signal transduction)	-	0.237414	undirected	CRL	-
TRINITY_DN78023_c0_g1	-	-	TRINITY_DN65087_c0_g12	vvi04016(MAPK signaling pathway - plant);vvi04075(Plant hormone signal transduction)	-	0.234464	undirected	-	-
TRINITY_DN73719_c1_g2	-	-	TRINITY_DN65087_c0_g12	vvi04016(MAPK signaling pathway - plant);vvi04075(Plant hormone signal transduction)	-	0.231464	undirected	-	-
TRINITY_DN55403_c0_g1	han00860(Porphyrin and chlorophyll metabolism)	GO:0005515(protein binding);GO:0005524(ATP binding);GO:0005739(mitochondrion);GO:0009507(chloroplast);GO:0009570(chloroplast stroma);GO:0009706(chloroplast inner membrane);GO:0010007(magnesium chelatase complex);GO:0015979(photosynthesis);GO:0015995(chlorophyll biosynthetic process);GO:0016851(magnesium chelatase activity)	TRINITY_DN65087_c0_g12	vvi04016(MAPK signaling pathway - plant);vvi04075(Plant hormone signal transduction)	-	0.227862	undirected	CHLH	-
TRINITY_DN77960_c2_g2	-	-	TRINITY_DN65087_c0_g12	vvi04016(MAPK signaling pathway - plant);vvi04075(Plant hormone signal transduction)	-	0.225244	undirected	-	-
TRINITY_DN58564_c0_g5	-	-	TRINITY_DN65087_c0_g12	vvi04016(MAPK signaling pathway - plant);vvi04075(Plant hormone signal transduction)	-	0.224702	undirected	-	-
TRINITY_DN85667_c0_g1	-	GO:0005737(cytoplasm);GO:0008150(biological_process)	TRINITY_DN65087_c0_g12	vvi04016(MAPK signaling pathway - plant);vvi04075(Plant hormone signal transduction)	-	0.2228	undirected	TOR1L3	-
TRINITY_DN59381_c0_g1	-	-	TRINITY_DN65087_c0_g12	vvi04016(MAPK signaling pathway - plant);vvi04075(Plant hormone signal transduction)	-	0.220066	undirected	-	-
TRINITY_DN78884_c0_g1	-	-	TRINITY_DN65087_c0_g12	vvi04016(MAPK signaling pathway - plant);vvi04075(Plant hormone signal transduction)	-	0.219748	undirected	-	-
TRINITY_DN70561_c0_g4	han04075(Plant hormone signal transduction)	GO:0004842(ubiquitin-protein transferase activity);GO:0005515(protein binding);GO:0005634(nucleus);GO:0006511(ubiquitin-dependent protein catabolic process);GO:0006952(defense response);GO:0009611(response to wounding);GO:0009625(response to insect);GO:0009641(shade avoidance);GO:0009753(response to jasmonic acid);GO:0009861(jasmonic acid and ethylene-dependent systemic resistance);GO:0009867(jas…	TRINITY_DN65087_c0_g12	vvi04016(MAPK signaling pathway - plant);vvi04075(Plant hormone signal transduction)	-	0.219078	undirected	COI1	-
TRINITY_DN74495_c1_g2	NA(NA)	GO:0005737(cytoplasm);GO:0005783(endoplasmic reticulum);GO:0005789(endoplasmic reticulum membrane);GO:0006629(lipid metabolic process);GO:0016021(integral component of membrane);GO:0016491(oxidoreductase activity);GO:0030148(sphingolipid biosynthetic process);GO:0046872(metal ion binding);GO:0052631(sphingolipid delta-8 desaturase activity);GO:0055114(oxidation-reduction process);GO:0070417(cellu…	TRINITY_DN65087_c0_g12	vvi04016(MAPK signaling pathway - plant);vvi04075(Plant hormone signal transduction)	-	0.211866	undirected	-	-
TRINITY_DN74195_c0_g1	han03022(Basal transcription factors)	GO:0003713(transcription coactivator activity);GO:0005669(transcription factor TFIID complex);GO:0006357(regulation of transcription by RNA polymerase II);GO:0008134(transcription factor binding);GO:0035035(histone acetyltransferase binding);GO:0044212(transcription regulatory region DNA binding);GO:0051123(RNA polymerase II transcriptional preinitiation complex assembly)	TRINITY_DN65087_c0_g12	vvi04016(MAPK signaling pathway - plant);vvi04075(Plant hormone signal transduction)	-	0.205942	undirected	TAF7	-
TRINITY_DN75454_c0_g6	ccaj00196(Photosynthesis - antenna proteins)	GO:0009416(response to light stimulus);GO:0009535(chloroplast thylakoid membrane);GO:0009768(photosynthesis, light harvesting in photosystem I);GO:0009941(chloroplast envelope);GO:0010287(plastoglobule);GO:0016168(chlorophyll binding);GO:0031409(pigment binding)	TRINITY_DN65087_c0_g12	vvi04016(MAPK signaling pathway - plant);vvi04075(Plant hormone signal transduction)	-	0.20532	undirected	CAB16	-
TRINITY_DN74571_c0_g3	-	-	TRINITY_DN65087_c0_g12	vvi04016(MAPK signaling pathway - plant);vvi04075(Plant hormone signal transduction)	-	0.204405	undirected	-	-
TRINITY_DN81324_c0_g1	-	-	TRINITY_DN65087_c0_g12	vvi04016(MAPK signaling pathway - plant);vvi04075(Plant hormone signal transduction)	-	0.203523	undirected	-	-
TRINITY_DN69338_c0_g1	jcu00860(Porphyrin and chlorophyll metabolism)	GO:0005506(iron ion binding);GO:0009507(chloroplast);GO:0009535(chloroplast thylakoid membrane);GO:0009706(chloroplast inner membrane);GO:0010277(chlorophyllide a oxygenase [overall] activity);GO:0015995(chlorophyll biosynthetic process);GO:0016705(oxidoreductase activity, acting on paired donors, with incorporation or reduction of molecular oxygen);GO:0042651(thylakoid membrane);GO:0051537(2 iro…	TRINITY_DN65087_c0_g12	vvi04016(MAPK signaling pathway - plant);vvi04075(Plant hormone signal transduction)	-	0.202126	undirected	CAO	-
TRINITY_DN68166_c0_g3	-	-	TRINITY_DN88145_c0_g1	han00630(Glyoxylate and dicarboxylate metabolism);han00380(Tryptophan metabolism);han04016(MAPK signaling pathway - plant);han04146(Peroxisome)	GO:0004096(catalase activity);GO:0005737(cytoplasm);GO:0020037(heme binding);GO:0042542(response to hydrogen peroxide);GO:0042744(hydrogen peroxide catabolic process)	0.228718	undirected	-	-
TRINITY_DN56123_c0_g1	NA(NA)	GO:0005094(Rho GDP-dissociation inhibitor activity);GO:0005096(GTPase activator activity);GO:0005515(protein binding);GO:0005737(cytoplasm);GO:0009932(cell tip growth);GO:0010053(root epidermal cell differentiation)	TRINITY_DN88145_c0_g1	han00630(Glyoxylate and dicarboxylate metabolism);han00380(Tryptophan metabolism);han04016(MAPK signaling pathway - plant);han04146(Peroxisome)	GO:0004096(catalase activity);GO:0005737(cytoplasm);GO:0020037(heme binding);GO:0042542(response to hydrogen peroxide);GO:0042744(hydrogen peroxide catabolic process)	0.21373	undirected	GDI1	-
TRINITY_DN71916_c0_g6	-	-	TRINITY_DN88145_c0_g1	han00630(Glyoxylate and dicarboxylate metabolism);han00380(Tryptophan metabolism);han04016(MAPK signaling pathway - plant);han04146(Peroxisome)	GO:0004096(catalase activity);GO:0005737(cytoplasm);GO:0020037(heme binding);GO:0042542(response to hydrogen peroxide);GO:0042744(hydrogen peroxide catabolic process)	0.204534	undirected	-	-
TRINITY_DN58564_c0_g5	-	-	TRINITY_DN88145_c0_g1	han00630(Glyoxylate and dicarboxylate metabolism);han00380(Tryptophan metabolism);han04016(MAPK signaling pathway - plant);han04146(Peroxisome)	GO:0004096(catalase activity);GO:0005737(cytoplasm);GO:0020037(heme binding);GO:0042542(response to hydrogen peroxide);GO:0042744(hydrogen peroxide catabolic process)	0.203621	undirected	-	-
TRINITY_DN70711_c1_g3	boe00562(Inositol phosphate metabolism);boe04070(Phosphatidylinositol signaling system)	GO:0003677(DNA binding);GO:0009295(nucleoid);GO:0009507(chloroplast);GO:0009508(plastid chromosome);GO:0009534(chloroplast thylakoid);GO:0009535(chloroplast thylakoid membrane);GO:0009579(thylakoid);GO:0009737(response to abscisic acid);GO:0009773(photosynthetic electron transport in photosystem I);GO:0009941(chloroplast envelope);GO:0016021(integral component of membrane);GO:0030093(chloroplast …	TRINITY_DN88145_c0_g1	han00630(Glyoxylate and dicarboxylate metabolism);han00380(Tryptophan metabolism);han04016(MAPK signaling pathway - plant);han04146(Peroxisome)	GO:0004096(catalase activity);GO:0005737(cytoplasm);GO:0020037(heme binding);GO:0042542(response to hydrogen peroxide);GO:0042744(hydrogen peroxide catabolic process)	0.201055	undirected	CURT1B	-
TRINITY_DN72946_c0_g1	nnu00563(Glycosylphosphatidylinositol(GPI)-anchor biosynthesis)	GO:0003674(molecular_function);GO:0005576(extracellular region);GO:0009739(response to gibberellin);GO:0009740(gibberellic acid mediated signaling pathway);GO:0009744(response to sucrose);GO:0009749(response to glucose);GO:0009750(response to fructose);GO:0080167(response to karrikin)	TRINITY_DN88145_c0_g1	han00630(Glyoxylate and dicarboxylate metabolism);han00380(Tryptophan metabolism);han04016(MAPK signaling pathway - plant);han04146(Peroxisome)	GO:0004096(catalase activity);GO:0005737(cytoplasm);GO:0020037(heme binding);GO:0042542(response to hydrogen peroxide);GO:0042744(hydrogen peroxide catabolic process)	0.20009	undirected	GASA6	-
TRINITY_DN68724_c0_g6	-	-	TRINITY_DN88145_c0_g1	han00630(Glyoxylate and dicarboxylate metabolism);han00380(Tryptophan metabolism);han04016(MAPK signaling pathway - plant);han04146(Peroxisome)	GO:0004096(catalase activity);GO:0005737(cytoplasm);GO:0020037(heme binding);GO:0042542(response to hydrogen peroxide);GO:0042744(hydrogen peroxide catabolic process)	0.19766	undirected	-	-
TRINITY_DN73975_c0_g2	han00196(Photosynthesis - antenna proteins)	GO:0009416(response to light stimulus);GO:0009535(chloroplast thylakoid membrane);GO:0009768(photosynthesis, light harvesting in photosystem I);GO:0009941(chloroplast envelope);GO:0010287(plastoglobule);GO:0016168(chlorophyll binding);GO:0031409(pigment binding)	TRINITY_DN88145_c0_g1	han00630(Glyoxylate and dicarboxylate metabolism);han00380(Tryptophan metabolism);han04016(MAPK signaling pathway - plant);han04146(Peroxisome)	GO:0004096(catalase activity);GO:0005737(cytoplasm);GO:0020037(heme binding);GO:0042542(response to hydrogen peroxide);GO:0042744(hydrogen peroxide catabolic process)	0.196019	undirected	AB80	-
TRINITY_DN73719_c1_g2	-	-	TRINITY_DN88145_c0_g1	han00630(Glyoxylate and dicarboxylate metabolism);han00380(Tryptophan metabolism);han04016(MAPK signaling pathway - plant);han04146(Peroxisome)	GO:0004096(catalase activity);GO:0005737(cytoplasm);GO:0020037(heme binding);GO:0042542(response to hydrogen peroxide);GO:0042744(hydrogen peroxide catabolic process)	0.193942	undirected	-	-
TRINITY_DN58292_c0_g1	han00195(Photosynthesis)	GO:0005515(protein binding)	TRINITY_DN88145_c0_g1	han00630(Glyoxylate and dicarboxylate metabolism);han00380(Tryptophan metabolism);han04016(MAPK signaling pathway - plant);han04146(Peroxisome)	GO:0004096(catalase activity);GO:0005737(cytoplasm);GO:0020037(heme binding);GO:0042542(response to hydrogen peroxide);GO:0042744(hydrogen peroxide catabolic process)	0.193602	undirected	psaD	-
TRINITY_DN69248_c0_g1	-	GO:0006869(lipid transport);GO:0008289(lipid binding);GO:0009506(plasmodesma);GO:0009507(chloroplast);GO:0009535(chloroplast thylakoid membrane);GO:0016020(membrane);GO:0048046(apoplast)	TRINITY_DN88145_c0_g1	han00630(Glyoxylate and dicarboxylate metabolism);han00380(Tryptophan metabolism);han04016(MAPK signaling pathway - plant);han04146(Peroxisome)	GO:0004096(catalase activity);GO:0005737(cytoplasm);GO:0020037(heme binding);GO:0042542(response to hydrogen peroxide);GO:0042744(hydrogen peroxide catabolic process)	0.189434	undirected	TPRP-F1	-
TRINITY_DN74571_c0_g3	-	-	TRINITY_DN88145_c0_g1	han00630(Glyoxylate and dicarboxylate metabolism);han00380(Tryptophan metabolism);han04016(MAPK signaling pathway - plant);han04146(Peroxisome)	GO:0004096(catalase activity);GO:0005737(cytoplasm);GO:0020037(heme binding);GO:0042542(response to hydrogen peroxide);GO:0042744(hydrogen peroxide catabolic process)	0.186448	undirected	-	-
TRINITY_DN74495_c1_g2	-	-	TRINITY_DN88145_c0_g1	han00630(Glyoxylate and dicarboxylate metabolism);han00380(Tryptophan metabolism);han04016(MAPK signaling pathway - plant);han04146(Peroxisome)	GO:0004096(catalase activity);GO:0005737(cytoplasm);GO:0020037(heme binding);GO:0042542(response to hydrogen peroxide);GO:0042744(hydrogen peroxide catabolic process)	0.184062	undirected	-	-
TRINITY_DN72370_c0_g3	sly00196(Photosynthesis - antenna proteins)	GO:0009416(response to light stimulus);GO:0009535(chloroplast thylakoid membrane);GO:0009768(photosynthesis, light harvesting in photosystem I);GO:0009941(chloroplast envelope);GO:0010287(plastoglobule);GO:0016168(chlorophyll binding);GO:0031409(pigment binding)	TRINITY_DN88145_c0_g1	han00630(Glyoxylate and dicarboxylate metabolism);han00380(Tryptophan metabolism);han04016(MAPK signaling pathway - plant);han04146(Peroxisome)	GO:0004096(catalase activity);GO:0005737(cytoplasm);GO:0020037(heme binding);GO:0042542(response to hydrogen peroxide);GO:0042744(hydrogen peroxide catabolic process)	0.181815	undirected	CAB2R	-
TRINITY_DN62890_c0_g1	csl03018(RNA degradation)	GO:0000304(response to singlet oxygen);GO:0042651(thylakoid membrane)	TRINITY_DN88145_c0_g1	han00630(Glyoxylate and dicarboxylate metabolism);han00380(Tryptophan metabolism);han04016(MAPK signaling pathway - plant);han04146(Peroxisome)	GO:0004096(catalase activity);GO:0005737(cytoplasm);GO:0020037(heme binding);GO:0042542(response to hydrogen peroxide);GO:0042744(hydrogen peroxide catabolic process)	0.179281	undirected	EX1	-
TRINITY_DN77936_c0_g1	-	-	TRINITY_DN88145_c0_g1	han00630(Glyoxylate and dicarboxylate metabolism);han00380(Tryptophan metabolism);han04016(MAPK signaling pathway - plant);han04146(Peroxisome)	GO:0004096(catalase activity);GO:0005737(cytoplasm);GO:0020037(heme binding);GO:0042542(response to hydrogen peroxide);GO:0042744(hydrogen peroxide catabolic process)	0.177694	undirected	-	-
TRINITY_DN83001_c1_g1	-	GO:0003735(structural constituent of ribosome);GO:0005840(ribosome);GO:0006412(translation);GO:0009507(chloroplast);GO:0009534(chloroplast thylakoid);GO:0009570(chloroplast stroma)	TRINITY_DN88145_c0_g1	han00630(Glyoxylate and dicarboxylate metabolism);han00380(Tryptophan metabolism);han04016(MAPK signaling pathway - plant);han04146(Peroxisome)	GO:0004096(catalase activity);GO:0005737(cytoplasm);GO:0020037(heme binding);GO:0042542(response to hydrogen peroxide);GO:0042744(hydrogen peroxide catabolic process)	0.175845	undirected	PSRP1	-
TRINITY_DN71182_c0_g1	NA(NA)	GO:0003735(structural constituent of ribosome);GO:0006412(translation)	TRINITY_DN88145_c0_g1	han00630(Glyoxylate and dicarboxylate metabolism);han00380(Tryptophan metabolism);han04016(MAPK signaling pathway - plant);han04146(Peroxisome)	GO:0004096(catalase activity);GO:0005737(cytoplasm);GO:0020037(heme binding);GO:0042542(response to hydrogen peroxide);GO:0042744(hydrogen peroxide catabolic process)	0.175662	undirected	ADNT1	-
TRINITY_DN71066_c0_g7	-	-	TRINITY_DN88145_c0_g1	han00630(Glyoxylate and dicarboxylate metabolism);han00380(Tryptophan metabolism);han04016(MAPK signaling pathway - plant);han04146(Peroxisome)	GO:0004096(catalase activity);GO:0005737(cytoplasm);GO:0020037(heme binding);GO:0042542(response to hydrogen peroxide);GO:0042744(hydrogen peroxide catabolic process)	0.172888	undirected	-	-
TRINITY_DN75502_c0_g5	han00900(Terpenoid backbone biosynthesis)	GO:0004420(hydroxymethylglutaryl-CoA reductase (NADPH) activity);GO:0005778(peroxisomal membrane);GO:0005789(endoplasmic reticulum membrane);GO:0008299(isoprenoid biosynthetic process);GO:0016126(sterol biosynthetic process)	TRINITY_DN88145_c0_g1	han00630(Glyoxylate and dicarboxylate metabolism);han00380(Tryptophan metabolism);han04016(MAPK signaling pathway - plant);han04146(Peroxisome)	GO:0004096(catalase activity);GO:0005737(cytoplasm);GO:0020037(heme binding);GO:0042542(response to hydrogen peroxide);GO:0042744(hydrogen peroxide catabolic process)	0.171689	undirected	HMG2	-
TRINITY_DN73975_c0_g2	han00196(Photosynthesis - antenna proteins)	GO:0009416(response to light stimulus);GO:0009535(chloroplast thylakoid membrane);GO:0009768(photosynthesis, light harvesting in photosystem I);GO:0009941(chloroplast envelope);GO:0010287(plastoglobule);GO:0016168(chlorophyll binding);GO:0031409(pigment binding)	TRINITY_DN88145_c0_g2	han00630(Glyoxylate and dicarboxylate metabolism);han00380(Tryptophan metabolism);han04016(MAPK signaling pathway - plant);han04146(Peroxisome)	GO:0004096(catalase activity);GO:0005737(cytoplasm);GO:0020037(heme binding);GO:0042542(response to hydrogen peroxide);GO:0042744(hydrogen peroxide catabolic process)	0.254418	undirected	AB80	-
TRINITY_DN71916_c0_g6	-	-	TRINITY_DN88145_c0_g2	han00630(Glyoxylate and dicarboxylate metabolism);han00380(Tryptophan metabolism);han04016(MAPK signaling pathway - plant);han04146(Peroxisome)	GO:0004096(catalase activity);GO:0005737(cytoplasm);GO:0020037(heme binding);GO:0042542(response to hydrogen peroxide);GO:0042744(hydrogen peroxide catabolic process)	0.249077	undirected	-	-
TRINITY_DN68724_c0_g6	-	-	TRINITY_DN88145_c0_g2	han00630(Glyoxylate and dicarboxylate metabolism);han00380(Tryptophan metabolism);han04016(MAPK signaling pathway - plant);han04146(Peroxisome)	GO:0004096(catalase activity);GO:0005737(cytoplasm);GO:0020037(heme binding);GO:0042542(response to hydrogen peroxide);GO:0042744(hydrogen peroxide catabolic process)	0.248192	undirected	-	-
TRINITY_DN72370_c0_g3	sly00196(Photosynthesis - antenna proteins)	GO:0009416(response to light stimulus);GO:0009535(chloroplast thylakoid membrane);GO:0009768(photosynthesis, light harvesting in photosystem I);GO:0009941(chloroplast envelope);GO:0010287(plastoglobule);GO:0016168(chlorophyll binding);GO:0031409(pigment binding)	TRINITY_DN88145_c0_g2	han00630(Glyoxylate and dicarboxylate metabolism);han00380(Tryptophan metabolism);han04016(MAPK signaling pathway - plant);han04146(Peroxisome)	GO:0004096(catalase activity);GO:0005737(cytoplasm);GO:0020037(heme binding);GO:0042542(response to hydrogen peroxide);GO:0042744(hydrogen peroxide catabolic process)	0.237591	undirected	CAB2R	-
TRINITY_DN56123_c0_g1	NA(NA)	GO:0005094(Rho GDP-dissociation inhibitor activity);GO:0005096(GTPase activator activity);GO:0005515(protein binding);GO:0005737(cytoplasm);GO:0009932(cell tip growth);GO:0010053(root epidermal cell differentiation)	TRINITY_DN88145_c0_g2	han00630(Glyoxylate and dicarboxylate metabolism);han00380(Tryptophan metabolism);han04016(MAPK signaling pathway - plant);han04146(Peroxisome)	GO:0004096(catalase activity);GO:0005737(cytoplasm);GO:0020037(heme binding);GO:0042542(response to hydrogen peroxide);GO:0042744(hydrogen peroxide catabolic process)	0.221749	undirected	GDI1	-
TRINITY_DN73027_c0_g1	-	-	TRINITY_DN88145_c0_g2	han00630(Glyoxylate and dicarboxylate metabolism);han00380(Tryptophan metabolism);han04016(MAPK signaling pathway - plant);han04146(Peroxisome)	GO:0004096(catalase activity);GO:0005737(cytoplasm);GO:0020037(heme binding);GO:0042542(response to hydrogen peroxide);GO:0042744(hydrogen peroxide catabolic process)	0.217834	undirected	-	-
TRINITY_DN72946_c0_g1	nnu00563(Glycosylphosphatidylinositol(GPI)-anchor biosynthesis)	GO:0003674(molecular_function);GO:0005576(extracellular region);GO:0009739(response to gibberellin);GO:0009740(gibberellic acid mediated signaling pathway);GO:0009744(response to sucrose);GO:0009749(response to glucose);GO:0009750(response to fructose);GO:0080167(response to karrikin)	TRINITY_DN88145_c0_g2	han00630(Glyoxylate and dicarboxylate metabolism);han00380(Tryptophan metabolism);han04016(MAPK signaling pathway - plant);han04146(Peroxisome)	GO:0004096(catalase activity);GO:0005737(cytoplasm);GO:0020037(heme binding);GO:0042542(response to hydrogen peroxide);GO:0042744(hydrogen peroxide catabolic process)	0.213982	undirected	GASA6	-
TRINITY_DN70711_c1_g3	boe00562(Inositol phosphate metabolism);boe04070(Phosphatidylinositol signaling system)	GO:0003677(DNA binding);GO:0009295(nucleoid);GO:0009507(chloroplast);GO:0009508(plastid chromosome);GO:0009534(chloroplast thylakoid);GO:0009535(chloroplast thylakoid membrane);GO:0009579(thylakoid);GO:0009737(response to abscisic acid);GO:0009773(photosynthetic electron transport in photosystem I);GO:0009941(chloroplast envelope);GO:0016021(integral component of membrane);GO:0030093(chloroplast …	TRINITY_DN88145_c0_g2	han00630(Glyoxylate and dicarboxylate metabolism);han00380(Tryptophan metabolism);han04016(MAPK signaling pathway - plant);han04146(Peroxisome)	GO:0004096(catalase activity);GO:0005737(cytoplasm);GO:0020037(heme binding);GO:0042542(response to hydrogen peroxide);GO:0042744(hydrogen peroxide catabolic process)	0.213613	undirected	CURT1B	-
TRINITY_DN58292_c0_g1	han00195(Photosynthesis)	GO:0005515(protein binding)	TRINITY_DN88145_c0_g2	han00630(Glyoxylate and dicarboxylate metabolism);han00380(Tryptophan metabolism);han04016(MAPK signaling pathway - plant);han04146(Peroxisome)	GO:0004096(catalase activity);GO:0005737(cytoplasm);GO:0020037(heme binding);GO:0042542(response to hydrogen peroxide);GO:0042744(hydrogen peroxide catabolic process)	0.212324	undirected	psaD	-
TRINITY_DN69248_c0_g1	-	GO:0006869(lipid transport);GO:0008289(lipid binding);GO:0009506(plasmodesma);GO:0009507(chloroplast);GO:0009535(chloroplast thylakoid membrane);GO:0016020(membrane);GO:0048046(apoplast)	TRINITY_DN88145_c0_g2	han00630(Glyoxylate and dicarboxylate metabolism);han00380(Tryptophan metabolism);han04016(MAPK signaling pathway - plant);han04146(Peroxisome)	GO:0004096(catalase activity);GO:0005737(cytoplasm);GO:0020037(heme binding);GO:0042542(response to hydrogen peroxide);GO:0042744(hydrogen peroxide catabolic process)	0.203842	undirected	TPRP-F1	-
TRINITY_DN77936_c0_g1	-	-	TRINITY_DN88145_c0_g2	han00630(Glyoxylate and dicarboxylate metabolism);han00380(Tryptophan metabolism);han04016(MAPK signaling pathway - plant);han04146(Peroxisome)	GO:0004096(catalase activity);GO:0005737(cytoplasm);GO:0020037(heme binding);GO:0042542(response to hydrogen peroxide);GO:0042744(hydrogen peroxide catabolic process)	0.201749	undirected	-	-
TRINITY_DN58564_c0_g5	-	-	TRINITY_DN88145_c0_g2	han00630(Glyoxylate and dicarboxylate metabolism);han00380(Tryptophan metabolism);han04016(MAPK signaling pathway - plant);han04146(Peroxisome)	GO:0004096(catalase activity);GO:0005737(cytoplasm);GO:0020037(heme binding);GO:0042542(response to hydrogen peroxide);GO:0042744(hydrogen peroxide catabolic process)	0.199939	undirected	-	-
TRINITY_DN68166_c0_g3	-	-	TRINITY_DN88145_c0_g2	han00630(Glyoxylate and dicarboxylate metabolism);han00380(Tryptophan metabolism);han04016(MAPK signaling pathway - plant);han04146(Peroxisome)	GO:0004096(catalase activity);GO:0005737(cytoplasm);GO:0020037(heme binding);GO:0042542(response to hydrogen peroxide);GO:0042744(hydrogen peroxide catabolic process)	0.194425	undirected	-	-
TRINITY_DN80970_c0_g1	-	GO:0005737(cytoplasm);GO:0005819(spindle);GO:0007010(cytoskeleton organization);GO:0008017(microtubule binding);GO:0009524(phragmoplast);GO:0009832(plant-type cell wall biogenesis);GO:0010005(cortical microtubule, transverse to long axis);GO:0010051(xylem and phloem pattern formation);GO:0071555(cell wall organization)	TRINITY_DN88145_c0_g2	han00630(Glyoxylate and dicarboxylate metabolism);han00380(Tryptophan metabolism);han04016(MAPK signaling pathway - plant);han04146(Peroxisome)	GO:0004096(catalase activity);GO:0005737(cytoplasm);GO:0020037(heme binding);GO:0042542(response to hydrogen peroxide);GO:0042744(hydrogen peroxide catabolic process)	0.193962	undirected	MAP70.2	-
TRINITY_DN85775_c0_g3	-	-	TRINITY_DN88145_c0_g2	han00630(Glyoxylate and dicarboxylate metabolism);han00380(Tryptophan metabolism);han04016(MAPK signaling pathway - plant);han04146(Peroxisome)	GO:0004096(catalase activity);GO:0005737(cytoplasm);GO:0020037(heme binding);GO:0042542(response to hydrogen peroxide);GO:0042744(hydrogen peroxide catabolic process)	0.186753	undirected	-	-
TRINITY_DN55130_c0_g1	NA(NA)	GO:0005783(endoplasmic reticulum);GO:0005886(plasma membrane);GO:0009926(auxin polar transport);GO:0010252(auxin homeostasis);GO:0010329(auxin efflux transmembrane transporter activity)	TRINITY_DN88145_c0_g2	han00630(Glyoxylate and dicarboxylate metabolism);han00380(Tryptophan metabolism);han04016(MAPK signaling pathway - plant);han04146(Peroxisome)	GO:0004096(catalase activity);GO:0005737(cytoplasm);GO:0020037(heme binding);GO:0042542(response to hydrogen peroxide);GO:0042744(hydrogen peroxide catabolic process)	0.186079	undirected	PIN3A	-
TRINITY_DN74495_c1_g2	-	-	TRINITY_DN88145_c0_g2	han00630(Glyoxylate and dicarboxylate metabolism);han00380(Tryptophan metabolism);han04016(MAPK signaling pathway - plant);han04146(Peroxisome)	GO:0004096(catalase activity);GO:0005737(cytoplasm);GO:0020037(heme binding);GO:0042542(response to hydrogen peroxide);GO:0042744(hydrogen peroxide catabolic process)	0.184446	undirected	-	-
TRINITY_DN83001_c1_g1	-	GO:0003735(structural constituent of ribosome);GO:0005840(ribosome);GO:0006412(translation);GO:0009507(chloroplast);GO:0009534(chloroplast thylakoid);GO:0009570(chloroplast stroma)	TRINITY_DN88145_c0_g2	han00630(Glyoxylate and dicarboxylate metabolism);han00380(Tryptophan metabolism);han04016(MAPK signaling pathway - plant);han04146(Peroxisome)	GO:0004096(catalase activity);GO:0005737(cytoplasm);GO:0020037(heme binding);GO:0042542(response to hydrogen peroxide);GO:0042744(hydrogen peroxide catabolic process)	0.171743	undirected	PSRP1	-
TRINITY_DN72229_c0_g1	-	GO:0005634(nucleus)	TRINITY_DN88145_c0_g2	han00630(Glyoxylate and dicarboxylate metabolism);han00380(Tryptophan metabolism);han04016(MAPK signaling pathway - plant);han04146(Peroxisome)	GO:0004096(catalase activity);GO:0005737(cytoplasm);GO:0020037(heme binding);GO:0042542(response to hydrogen peroxide);GO:0042744(hydrogen peroxide catabolic process)	0.160214	undirected	QWRF2	-
TRINITY_DN78023_c0_g1	-	-	TRINITY_DN88145_c0_g2	han00630(Glyoxylate and dicarboxylate metabolism);han00380(Tryptophan metabolism);han04016(MAPK signaling pathway - plant);han04146(Peroxisome)	GO:0004096(catalase activity);GO:0005737(cytoplasm);GO:0020037(heme binding);GO:0042542(response to hydrogen peroxide);GO:0042744(hydrogen peroxide catabolic process)	0.155789	undirected	-	-
TRINITY_DN77261_c4_g2	-	-	TRINITY_DN58366_c0_g4	ats04075(Plant hormone signal transduction)	GO:0003677(DNA binding);GO:0003700(DNA binding transcription factor activity);GO:0005515(protein binding);GO:0005622(intracellular);GO:0005634(nucleus);GO:0006351(transcription, DNA-templated);GO:0006355(regulation of transcription, DNA-templated);GO:0006417(regulation of translation);GO:0009733(response to auxin);GO:0009734(auxin-activated signaling pathway);GO:0043565(sequence-specific DNA bind…	0.179643	undirected	-	AUX28
TRINITY_DN70711_c1_g3	boe00562(Inositol phosphate metabolism);boe04070(Phosphatidylinositol signaling system)	GO:0003677(DNA binding);GO:0009295(nucleoid);GO:0009507(chloroplast);GO:0009508(plastid chromosome);GO:0009534(chloroplast thylakoid);GO:0009535(chloroplast thylakoid membrane);GO:0009579(thylakoid);GO:0009737(response to abscisic acid);GO:0009773(photosynthetic electron transport in photosystem I);GO:0009941(chloroplast envelope);GO:0016021(integral component of membrane);GO:0030093(chloroplast …	TRINITY_DN58366_c0_g4	ats04075(Plant hormone signal transduction)	GO:0003677(DNA binding);GO:0003700(DNA binding transcription factor activity);GO:0005515(protein binding);GO:0005622(intracellular);GO:0005634(nucleus);GO:0006351(transcription, DNA-templated);GO:0006355(regulation of transcription, DNA-templated);GO:0006417(regulation of translation);GO:0009733(response to auxin);GO:0009734(auxin-activated signaling pathway);GO:0043565(sequence-specific DNA bind…	0.177907	undirected	CURT1B	AUX28
TRINITY_DN61161_c0_g1	han00630(Glyoxylate and dicarboxylate metabolism);han00250(Alanine, aspartate and glutamate metabolism);han00260(Glycine, serine and threonine metabolism);han04146(Peroxisome)	GO:0004760(serine-pyruvate transaminase activity);GO:0005777(peroxisome);GO:0005886(plasma membrane);GO:0008453(alanine-glyoxylate transaminase activity);GO:0009507(chloroplast);GO:0009570(chloroplast stroma);GO:0009853(photorespiration);GO:0016020(membrane);GO:0019265(glycine biosynthetic process, by transamination of glyoxylate);GO:0048046(apoplast);GO:0050281(serine-glyoxylate transaminase act…	TRINITY_DN58366_c0_g4	ats04075(Plant hormone signal transduction)	GO:0003677(DNA binding);GO:0003700(DNA binding transcription factor activity);GO:0005515(protein binding);GO:0005622(intracellular);GO:0005634(nucleus);GO:0006351(transcription, DNA-templated);GO:0006355(regulation of transcription, DNA-templated);GO:0006417(regulation of translation);GO:0009733(response to auxin);GO:0009734(auxin-activated signaling pathway);GO:0043565(sequence-specific DNA bind…	0.154865	undirected	AGT1	AUX28
TRINITY_DN64210_c1_g1	han00195(Photosynthesis)	GO:0005515(protein binding)	TRINITY_DN58366_c0_g4	ats04075(Plant hormone signal transduction)	GO:0003677(DNA binding);GO:0003700(DNA binding transcription factor activity);GO:0005515(protein binding);GO:0005622(intracellular);GO:0005634(nucleus);GO:0006351(transcription, DNA-templated);GO:0006355(regulation of transcription, DNA-templated);GO:0006417(regulation of translation);GO:0009733(response to auxin);GO:0009734(auxin-activated signaling pathway);GO:0043565(sequence-specific DNA bind…	0.148704	undirected	psaD	AUX28
TRINITY_DN83609_c2_g1	han00500(Starch and sucrose metabolism);han00520(Amino sugar and nucleotide sugar metabolism)	GO:0005524(ATP binding);GO:0005978(glycogen biosynthetic process);GO:0008878(glucose-1-phosphate adenylyltransferase activity);GO:0009507(chloroplast);GO:0009570(chloroplast stroma);GO:0009941(chloroplast envelope);GO:0019252(starch biosynthetic process)	TRINITY_DN58366_c0_g4	ats04075(Plant hormone signal transduction)	GO:0003677(DNA binding);GO:0003700(DNA binding transcription factor activity);GO:0005515(protein binding);GO:0005622(intracellular);GO:0005634(nucleus);GO:0006351(transcription, DNA-templated);GO:0006355(regulation of transcription, DNA-templated);GO:0006417(regulation of translation);GO:0009733(response to auxin);GO:0009734(auxin-activated signaling pathway);GO:0043565(sequence-specific DNA bind…	0.143675	undirected	ADG2	AUX28
TRINITY_DN66502_c0_g2	sly00196(Photosynthesis - antenna proteins)	GO:0009416(response to light stimulus);GO:0009535(chloroplast thylakoid membrane);GO:0009768(photosynthesis, light harvesting in photosystem I);GO:0009941(chloroplast envelope);GO:0010287(plastoglobule);GO:0016168(chlorophyll binding);GO:0031409(pigment binding)	TRINITY_DN58366_c0_g4	ats04075(Plant hormone signal transduction)	GO:0003677(DNA binding);GO:0003700(DNA binding transcription factor activity);GO:0005515(protein binding);GO:0005622(intracellular);GO:0005634(nucleus);GO:0006351(transcription, DNA-templated);GO:0006355(regulation of transcription, DNA-templated);GO:0006417(regulation of translation);GO:0009733(response to auxin);GO:0009734(auxin-activated signaling pathway);GO:0043565(sequence-specific DNA bind…	0.118936	undirected	CAB8	AUX28
TRINITY_DN77731_c1_g7	-	-	TRINITY_DN58366_c0_g4	ats04075(Plant hormone signal transduction)	GO:0003677(DNA binding);GO:0003700(DNA binding transcription factor activity);GO:0005515(protein binding);GO:0005622(intracellular);GO:0005634(nucleus);GO:0006351(transcription, DNA-templated);GO:0006355(regulation of transcription, DNA-templated);GO:0006417(regulation of translation);GO:0009733(response to auxin);GO:0009734(auxin-activated signaling pathway);GO:0043565(sequence-specific DNA bind…	0.118229	undirected	-	AUX28
TRINITY_DN87155_c1_g2	NA(NA)	GO:0006855(drug transmembrane transport)	TRINITY_DN58366_c0_g4	ats04075(Plant hormone signal transduction)	GO:0003677(DNA binding);GO:0003700(DNA binding transcription factor activity);GO:0005515(protein binding);GO:0005622(intracellular);GO:0005634(nucleus);GO:0006351(transcription, DNA-templated);GO:0006355(regulation of transcription, DNA-templated);GO:0006417(regulation of translation);GO:0009733(response to auxin);GO:0009734(auxin-activated signaling pathway);GO:0043565(sequence-specific DNA bind…	0.118047	undirected	DTX12	AUX28
TRINITY_DN59794_c0_g4	-	-	TRINITY_DN58366_c0_g4	ats04075(Plant hormone signal transduction)	GO:0003677(DNA binding);GO:0003700(DNA binding transcription factor activity);GO:0005515(protein binding);GO:0005622(intracellular);GO:0005634(nucleus);GO:0006351(transcription, DNA-templated);GO:0006355(regulation of transcription, DNA-templated);GO:0006417(regulation of translation);GO:0009733(response to auxin);GO:0009734(auxin-activated signaling pathway);GO:0043565(sequence-specific DNA bind…	0.11804	undirected	-	AUX28
TRINITY_DN87146_c1_g1	han00591(Linoleic acid metabolism);han00592(alpha-Linolenic acid metabolism)	GO:0016165(linoleate 13S-lipoxygenase activity)	TRINITY_DN58366_c0_g4	ats04075(Plant hormone signal transduction)	GO:0003677(DNA binding);GO:0003700(DNA binding transcription factor activity);GO:0005515(protein binding);GO:0005622(intracellular);GO:0005634(nucleus);GO:0006351(transcription, DNA-templated);GO:0006355(regulation of transcription, DNA-templated);GO:0006417(regulation of translation);GO:0009733(response to auxin);GO:0009734(auxin-activated signaling pathway);GO:0043565(sequence-specific DNA bind…	0.116262	undirected	LOX2.1	AUX28
TRINITY_DN58564_c0_g5	-	-	TRINITY_DN58366_c0_g4	ats04075(Plant hormone signal transduction)	GO:0003677(DNA binding);GO:0003700(DNA binding transcription factor activity);GO:0005515(protein binding);GO:0005622(intracellular);GO:0005634(nucleus);GO:0006351(transcription, DNA-templated);GO:0006355(regulation of transcription, DNA-templated);GO:0006417(regulation of translation);GO:0009733(response to auxin);GO:0009734(auxin-activated signaling pathway);GO:0043565(sequence-specific DNA bind…	0.114777	undirected	-	AUX28
TRINITY_DN80165_c0_g5	han00520(Amino sugar and nucleotide sugar metabolism)	GO:0004335(galactokinase activity);GO:0005524(ATP binding);GO:0005534(galactose binding);GO:0005737(cytoplasm);GO:0005829(cytosol);GO:0006012(galactose metabolic process);GO:0016301(kinase activity);GO:0016310(phosphorylation);GO:0016773(phosphotransferase activity, alcohol group as acceptor);GO:0046396(D-galacturonate metabolic process);GO:0046835(carbohydrate phosphorylation);GO:0046872(metal i…	TRINITY_DN58366_c0_g4	ats04075(Plant hormone signal transduction)	GO:0003677(DNA binding);GO:0003700(DNA binding transcription factor activity);GO:0005515(protein binding);GO:0005622(intracellular);GO:0005634(nucleus);GO:0006351(transcription, DNA-templated);GO:0006355(regulation of transcription, DNA-templated);GO:0006417(regulation of translation);GO:0009733(response to auxin);GO:0009734(auxin-activated signaling pathway);GO:0043565(sequence-specific DNA bind…	0.114414	undirected	GALAK	AUX28
TRINITY_DN72229_c0_g1	-	GO:0005634(nucleus)	TRINITY_DN58366_c0_g4	ats04075(Plant hormone signal transduction)	GO:0003677(DNA binding);GO:0003700(DNA binding transcription factor activity);GO:0005515(protein binding);GO:0005622(intracellular);GO:0005634(nucleus);GO:0006351(transcription, DNA-templated);GO:0006355(regulation of transcription, DNA-templated);GO:0006417(regulation of translation);GO:0009733(response to auxin);GO:0009734(auxin-activated signaling pathway);GO:0043565(sequence-specific DNA bind…	0.113172	undirected	QWRF2	AUX28
TRINITY_DN74226_c0_g2	-	-	TRINITY_DN58366_c0_g4	ats04075(Plant hormone signal transduction)	GO:0003677(DNA binding);GO:0003700(DNA binding transcription factor activity);GO:0005515(protein binding);GO:0005622(intracellular);GO:0005634(nucleus);GO:0006351(transcription, DNA-templated);GO:0006355(regulation of transcription, DNA-templated);GO:0006417(regulation of translation);GO:0009733(response to auxin);GO:0009734(auxin-activated signaling pathway);GO:0043565(sequence-specific DNA bind…	0.110391	undirected	-	AUX28
TRINITY_DN54143_c0_g1	-	-	TRINITY_DN58366_c0_g4	ats04075(Plant hormone signal transduction)	GO:0003677(DNA binding);GO:0003700(DNA binding transcription factor activity);GO:0005515(protein binding);GO:0005622(intracellular);GO:0005634(nucleus);GO:0006351(transcription, DNA-templated);GO:0006355(regulation of transcription, DNA-templated);GO:0006417(regulation of translation);GO:0009733(response to auxin);GO:0009734(auxin-activated signaling pathway);GO:0043565(sequence-specific DNA bind…	0.109567	undirected	-	AUX28
TRINITY_DN81324_c0_g1	-	-	TRINITY_DN58366_c0_g4	ats04075(Plant hormone signal transduction)	GO:0003677(DNA binding);GO:0003700(DNA binding transcription factor activity);GO:0005515(protein binding);GO:0005622(intracellular);GO:0005634(nucleus);GO:0006351(transcription, DNA-templated);GO:0006355(regulation of transcription, DNA-templated);GO:0006417(regulation of translation);GO:0009733(response to auxin);GO:0009734(auxin-activated signaling pathway);GO:0043565(sequence-specific DNA bind…	0.107622	undirected	-	AUX28
TRINITY_DN73369_c0_g3	NA(NA)	GO:0003777(microtubule motor activity);GO:0005737(cytoplasm);GO:0005868(cytoplasmic dynein complex);GO:0005875(microtubule associated complex);GO:0007017(microtubule-based process);GO:0030286(dynein complex)	TRINITY_DN58366_c0_g4	ats04075(Plant hormone signal transduction)	GO:0003677(DNA binding);GO:0003700(DNA binding transcription factor activity);GO:0005515(protein binding);GO:0005622(intracellular);GO:0005634(nucleus);GO:0006351(transcription, DNA-templated);GO:0006355(regulation of transcription, DNA-templated);GO:0006417(regulation of translation);GO:0009733(response to auxin);GO:0009734(auxin-activated signaling pathway);GO:0043565(sequence-specific DNA bind…	0.0990252	undirected	dlcB	AUX28
TRINITY_DN69157_c0_g2	-	-	TRINITY_DN58366_c0_g4	ats04075(Plant hormone signal transduction)	GO:0003677(DNA binding);GO:0003700(DNA binding transcription factor activity);GO:0005515(protein binding);GO:0005622(intracellular);GO:0005634(nucleus);GO:0006351(transcription, DNA-templated);GO:0006355(regulation of transcription, DNA-templated);GO:0006417(regulation of translation);GO:0009733(response to auxin);GO:0009734(auxin-activated signaling pathway);GO:0043565(sequence-specific DNA bind…	0.0966066	undirected	-	AUX28
TRINITY_DN61317_c1_g5	-	-	TRINITY_DN58366_c0_g4	ats04075(Plant hormone signal transduction)	GO:0003677(DNA binding);GO:0003700(DNA binding transcription factor activity);GO:0005515(protein binding);GO:0005622(intracellular);GO:0005634(nucleus);GO:0006351(transcription, DNA-templated);GO:0006355(regulation of transcription, DNA-templated);GO:0006417(regulation of translation);GO:0009733(response to auxin);GO:0009734(auxin-activated signaling pathway);GO:0043565(sequence-specific DNA bind…	0.0965977	undirected	-	AUX28
TRINITY_DN55130_c0_g1	NA(NA)	GO:0005783(endoplasmic reticulum);GO:0005886(plasma membrane);GO:0009926(auxin polar transport);GO:0010252(auxin homeostasis);GO:0010329(auxin efflux transmembrane transporter activity)	TRINITY_DN58366_c0_g4	ats04075(Plant hormone signal transduction)	GO:0003677(DNA binding);GO:0003700(DNA binding transcription factor activity);GO:0005515(protein binding);GO:0005622(intracellular);GO:0005634(nucleus);GO:0006351(transcription, DNA-templated);GO:0006355(regulation of transcription, DNA-templated);GO:0006417(regulation of translation);GO:0009733(response to auxin);GO:0009734(auxin-activated signaling pathway);GO:0043565(sequence-specific DNA bind…	0.0937368	undirected	PIN3A	AUX28

## Sheet: red
fromNode	KEGG_Pathway	GO_Term	toNode	KEGG_Pathway	GO_Term	weight	direction	fromAltName	toAltName
TRINITY_DN87282_c1_g1	-	GO:0003677(DNA binding);GO:0005516(calmodulin binding);GO:0005634(nucleus);GO:0006351(transcription, DNA-templated);GO:0006355(regulation of transcription, DNA-templated);GO:0006950(response to stress)	TRINITY_DN58873_c0_g2	pxb04016(MAPK signaling pathway - plant);pxb04070(Phosphatidylinositol signaling system);pxb04626(Plant-pathogen interaction)	-	0.306993	undirected	CBP60B	-
TRINITY_DN60750_c0_g1	NA(NA)	GO:0000981(RNA polymerase II transcription factor activity, sequence-specific DNA binding);GO:0001135(transcription factor activity, RNA polymerase II transcription factor recruiting);GO:0003677(DNA binding);GO:0003700(DNA binding transcription factor activity);GO:0005515(protein binding);GO:0005634(nucleus);GO:0006351(transcription, DNA-templated);GO:0006355(regulation of transcription, DNA-temp…	TRINITY_DN58873_c0_g2	pxb04016(MAPK signaling pathway - plant);pxb04070(Phosphatidylinositol signaling system);pxb04626(Plant-pathogen interaction)	-	0.305493	undirected	WER	-
TRINITY_DN62790_c0_g5	-	-	TRINITY_DN58873_c0_g2	pxb04016(MAPK signaling pathway - plant);pxb04070(Phosphatidylinositol signaling system);pxb04626(Plant-pathogen interaction)	-	0.305044	undirected	-	-
TRINITY_DN86853_c0_g3	-	GO:0003677(DNA binding);GO:0005516(calmodulin binding);GO:0005634(nucleus);GO:0006351(transcription, DNA-templated);GO:0006355(regulation of transcription, DNA-templated);GO:0006950(response to stress)	TRINITY_DN58873_c0_g2	pxb04016(MAPK signaling pathway - plant);pxb04070(Phosphatidylinositol signaling system);pxb04626(Plant-pathogen interaction)	-	0.303005	undirected	CBP60C	-
TRINITY_DN54031_c0_g1	han04016(MAPK signaling pathway - plant);han04070(Phosphatidylinositol signaling system);han04626(Plant-pathogen interaction)	GO:0005509(calcium ion binding)	TRINITY_DN58873_c0_g2	pxb04016(MAPK signaling pathway - plant);pxb04070(Phosphatidylinositol signaling system);pxb04626(Plant-pathogen interaction)	-	0.297776	undirected	CML45	-
TRINITY_DN65619_c0_g2	-	GO:0003674(molecular_function);GO:0005634(nucleus);GO:0005886(plasma membrane);GO:0008150(biological_process)	TRINITY_DN58873_c0_g2	pxb04016(MAPK signaling pathway - plant);pxb04070(Phosphatidylinositol signaling system);pxb04626(Plant-pathogen interaction)	-	0.297399	undirected	At1g76070	-
TRINITY_DN57425_c0_g1	han00940(Phenylpropanoid biosynthesis);han00945(Stilbenoid, diarylheptanoid and gingerol biosynthesis);han00941(Flavonoid biosynthesis)	GO:0005515(protein binding);GO:0005737(cytoplasm);GO:0005829(cytosol);GO:0009809(lignin biosynthetic process);GO:0009963(positive regulation of flavonoid biosynthetic process);GO:0010252(auxin homeostasis);GO:0016020(membrane);GO:0016740(transferase activity);GO:0047172(shikimate O-hydroxycinnamoyltransferase activity);GO:0047205(quinate O-hydroxycinnamoyltransferase activity);GO:0071555(cell wal…	TRINITY_DN58873_c0_g2	pxb04016(MAPK signaling pathway - plant);pxb04070(Phosphatidylinositol signaling system);pxb04626(Plant-pathogen interaction)	-	0.296786	undirected	HST	-
TRINITY_DN76106_c1_g1	han00360(Phenylalanine metabolism);han00940(Phenylpropanoid biosynthesis);han00945(Stilbenoid, diarylheptanoid and gingerol biosynthesis);han00941(Flavonoid biosynthesis)	GO:0005634(nucleus);GO:0005829(cytosol);GO:0008171(O-methyltransferase activity);GO:0009805(coumarin biosynthetic process);GO:0009809(lignin biosynthetic process);GO:0032259(methylation);GO:0042409(caffeoyl-CoA O-methyltransferase activity);GO:0046686(response to cadmium ion);GO:0046872(metal ion binding)	TRINITY_DN58873_c0_g2	pxb04016(MAPK signaling pathway - plant);pxb04070(Phosphatidylinositol signaling system);pxb04626(Plant-pathogen interaction)	-	0.29373	undirected	CCOAOMT	-
TRINITY_DN57504_c1_g8	han00940(Phenylpropanoid biosynthesis);han00945(Stilbenoid, diarylheptanoid and gingerol biosynthesis);han00941(Flavonoid biosynthesis)	GO:0005737(cytoplasm);GO:0009735(response to cytokinin);GO:0016740(transferase activity)	TRINITY_DN58873_c0_g2	pxb04016(MAPK signaling pathway - plant);pxb04070(Phosphatidylinositol signaling system);pxb04626(Plant-pathogen interaction)	-	0.293589	undirected	ACT	-
TRINITY_DN62361_c1_g4	-	-	TRINITY_DN58873_c0_g2	pxb04016(MAPK signaling pathway - plant);pxb04070(Phosphatidylinositol signaling system);pxb04626(Plant-pathogen interaction)	-	0.293478	undirected	-	-
TRINITY_DN83893_c0_g1	-	-	TRINITY_DN58873_c0_g2	pxb04016(MAPK signaling pathway - plant);pxb04070(Phosphatidylinositol signaling system);pxb04626(Plant-pathogen interaction)	-	0.292729	undirected	-	-
TRINITY_DN68953_c0_g1	han04075(Plant hormone signal transduction)	GO:0003700(DNA binding transcription factor activity);GO:0005515(protein binding);GO:0005634(nucleus);GO:0006351(transcription, DNA-templated);GO:0006355(regulation of transcription, DNA-templated);GO:0009733(response to auxin);GO:0009734(auxin-activated signaling pathway);GO:0009880(embryonic pattern specification);GO:0010051(xylem and phloem pattern formation);GO:0045892(negative regulation of …	TRINITY_DN58873_c0_g2	pxb04016(MAPK signaling pathway - plant);pxb04070(Phosphatidylinositol signaling system);pxb04626(Plant-pathogen interaction)	-	0.291946	undirected	IAA12	-
TRINITY_DN61560_c0_g2	-	-	TRINITY_DN58873_c0_g2	pxb04016(MAPK signaling pathway - plant);pxb04070(Phosphatidylinositol signaling system);pxb04626(Plant-pathogen interaction)	-	0.291799	undirected	-	-
TRINITY_DN74943_c0_g1	NA(NA)	GO:0005737(cytoplasm);GO:0005834(heterotrimeric G-protein complex);GO:0007165(signal transduction)	TRINITY_DN58873_c0_g2	pxb04016(MAPK signaling pathway - plant);pxb04070(Phosphatidylinositol signaling system);pxb04626(Plant-pathogen interaction)	-	0.29126	undirected	WDR44	-
TRINITY_DN62361_c1_g5	-	-	TRINITY_DN58873_c0_g2	pxb04016(MAPK signaling pathway - plant);pxb04070(Phosphatidylinositol signaling system);pxb04626(Plant-pathogen interaction)	-	0.290822	undirected	-	-
TRINITY_DN74713_c0_g2	NA(NA)	GO:0004674(protein serine/threonine kinase activity);GO:0004675(transmembrane receptor protein serine/threonine kinase activity);GO:0004713(protein tyrosine kinase activity);GO:0005524(ATP binding);GO:0005886(plasma membrane);GO:0006468(protein phosphorylation);GO:0006952(defense response);GO:0007166(cell surface receptor signaling pathway);GO:0009507(chloroplast);GO:0016301(kinase activity);GO:1…	TRINITY_DN58873_c0_g2	pxb04016(MAPK signaling pathway - plant);pxb04070(Phosphatidylinositol signaling system);pxb04626(Plant-pathogen interaction)	-	0.290397	undirected	PBL10	-
TRINITY_DN71539_c0_g2	-	-	TRINITY_DN58873_c0_g2	pxb04016(MAPK signaling pathway - plant);pxb04070(Phosphatidylinositol signaling system);pxb04626(Plant-pathogen interaction)	-	0.289002	undirected	-	-
TRINITY_DN63397_c0_g1	-	GO:0003674(molecular_function);GO:0008150(biological_process)	TRINITY_DN58873_c0_g2	pxb04016(MAPK signaling pathway - plant);pxb04070(Phosphatidylinositol signaling system);pxb04626(Plant-pathogen interaction)	-	0.287901	undirected	At2g27310	-
TRINITY_DN84157_c0_g2	-	-	TRINITY_DN58873_c0_g2	pxb04016(MAPK signaling pathway - plant);pxb04070(Phosphatidylinositol signaling system);pxb04626(Plant-pathogen interaction)	-	0.285156	undirected	NLP1	-
TRINITY_DN58470_c0_g1	-	-	TRINITY_DN58873_c0_g2	pxb04016(MAPK signaling pathway - plant);pxb04070(Phosphatidylinositol signaling system);pxb04626(Plant-pathogen interaction)	-	0.284967	undirected	-	-
TRINITY_DN54031_c0_g1	han04016(MAPK signaling pathway - plant);han04070(Phosphatidylinositol signaling system);han04626(Plant-pathogen interaction)	GO:0005509(calcium ion binding)	TRINITY_DN69663_c0_g2	han04016(MAPK signaling pathway - plant);han04626(Plant-pathogen interaction)	GO:0003700(DNA binding transcription factor activity);GO:0005515(protein binding);GO:0005634(nucleus);GO:0006351(transcription, DNA-templated);GO:0006355(regulation of transcription, DNA-templated);GO:0006970(response to osmotic stress);GO:0009408(response to heat);GO:0009409(response to cold);GO:0009414(response to water deprivation);GO:0009651(response to salt stress);GO:0010120(camalexin biosy…	0.284961	undirected	CML45	WRKY24
TRINITY_DN73774_c0_g1	lja04016(MAPK signaling pathway - plant);lja04626(Plant-pathogen interaction)	GO:0003700(DNA binding transcription factor activity);GO:0005515(protein binding);GO:0005634(nucleus);GO:0006351(transcription, DNA-templated);GO:0006355(regulation of transcription, DNA-templated);GO:0009867(jasmonic acid mediated signaling pathway);GO:0042742(defense response to bacterium);GO:0043565(sequence-specific DNA binding);GO:0050832(defense response to fungus)	TRINITY_DN69663_c0_g2	han04016(MAPK signaling pathway - plant);han04626(Plant-pathogen interaction)	GO:0003700(DNA binding transcription factor activity);GO:0005515(protein binding);GO:0005634(nucleus);GO:0006351(transcription, DNA-templated);GO:0006355(regulation of transcription, DNA-templated);GO:0006970(response to osmotic stress);GO:0009408(response to heat);GO:0009409(response to cold);GO:0009414(response to water deprivation);GO:0009651(response to salt stress);GO:0010120(camalexin biosy…	0.278462	undirected	WRKY51	WRKY24
TRINITY_DN84157_c0_g2	-	-	TRINITY_DN69663_c0_g2	han04016(MAPK signaling pathway - plant);han04626(Plant-pathogen interaction)	GO:0003700(DNA binding transcription factor activity);GO:0005515(protein binding);GO:0005634(nucleus);GO:0006351(transcription, DNA-templated);GO:0006355(regulation of transcription, DNA-templated);GO:0006970(response to osmotic stress);GO:0009408(response to heat);GO:0009409(response to cold);GO:0009414(response to water deprivation);GO:0009651(response to salt stress);GO:0010120(camalexin biosy…	0.27812	undirected	NLP1	WRKY24
TRINITY_DN80121_c0_g1	egr04075(Plant hormone signal transduction)	GO:0003700(DNA binding transcription factor activity);GO:0005634(nucleus);GO:0006355(regulation of transcription, DNA-templated);GO:0043565(sequence-specific DNA binding)	TRINITY_DN69663_c0_g2	han04016(MAPK signaling pathway - plant);han04626(Plant-pathogen interaction)	GO:0003700(DNA binding transcription factor activity);GO:0005515(protein binding);GO:0005634(nucleus);GO:0006351(transcription, DNA-templated);GO:0006355(regulation of transcription, DNA-templated);GO:0006970(response to osmotic stress);GO:0009408(response to heat);GO:0009409(response to cold);GO:0009414(response to water deprivation);GO:0009651(response to salt stress);GO:0010120(camalexin biosy…	0.27762	undirected	SCL14	WRKY24
TRINITY_DN83893_c0_g1	-	-	TRINITY_DN69663_c0_g2	han04016(MAPK signaling pathway - plant);han04626(Plant-pathogen interaction)	GO:0003700(DNA binding transcription factor activity);GO:0005515(protein binding);GO:0005634(nucleus);GO:0006351(transcription, DNA-templated);GO:0006355(regulation of transcription, DNA-templated);GO:0006970(response to osmotic stress);GO:0009408(response to heat);GO:0009409(response to cold);GO:0009414(response to water deprivation);GO:0009651(response to salt stress);GO:0010120(camalexin biosy…	0.276508	undirected	-	WRKY24
TRINITY_DN87282_c1_g1	-	GO:0003677(DNA binding);GO:0005516(calmodulin binding);GO:0005634(nucleus);GO:0006351(transcription, DNA-templated);GO:0006355(regulation of transcription, DNA-templated);GO:0006950(response to stress)	TRINITY_DN69663_c0_g2	han04016(MAPK signaling pathway - plant);han04626(Plant-pathogen interaction)	GO:0003700(DNA binding transcription factor activity);GO:0005515(protein binding);GO:0005634(nucleus);GO:0006351(transcription, DNA-templated);GO:0006355(regulation of transcription, DNA-templated);GO:0006970(response to osmotic stress);GO:0009408(response to heat);GO:0009409(response to cold);GO:0009414(response to water deprivation);GO:0009651(response to salt stress);GO:0010120(camalexin biosy…	0.276396	undirected	CBP60B	WRKY24
TRINITY_DN66337_c1_g1	NA(NA)	GO:0003677(DNA binding);GO:0003700(DNA binding transcription factor activity);GO:0005515(protein binding);GO:0005634(nucleus);GO:0006351(transcription, DNA-templated);GO:0006355(regulation of transcription, DNA-templated);GO:0009873(ethylene-activated signaling pathway);GO:0010087(phloem or xylem histogenesis);GO:0044212(transcription regulatory region DNA binding);GO:0045893(positive regulation …	TRINITY_DN69663_c0_g2	han04016(MAPK signaling pathway - plant);han04626(Plant-pathogen interaction)	GO:0003700(DNA binding transcription factor activity);GO:0005515(protein binding);GO:0005634(nucleus);GO:0006351(transcription, DNA-templated);GO:0006355(regulation of transcription, DNA-templated);GO:0006970(response to osmotic stress);GO:0009408(response to heat);GO:0009409(response to cold);GO:0009414(response to water deprivation);GO:0009651(response to salt stress);GO:0010120(camalexin biosy…	0.274819	undirected	ERF5	WRKY24
TRINITY_DN60750_c0_g1	NA(NA)	GO:0000981(RNA polymerase II transcription factor activity, sequence-specific DNA binding);GO:0001135(transcription factor activity, RNA polymerase II transcription factor recruiting);GO:0003677(DNA binding);GO:0003700(DNA binding transcription factor activity);GO:0005515(protein binding);GO:0005634(nucleus);GO:0006351(transcription, DNA-templated);GO:0006355(regulation of transcription, DNA-temp…	TRINITY_DN69663_c0_g2	han04016(MAPK signaling pathway - plant);han04626(Plant-pathogen interaction)	GO:0003700(DNA binding transcription factor activity);GO:0005515(protein binding);GO:0005634(nucleus);GO:0006351(transcription, DNA-templated);GO:0006355(regulation of transcription, DNA-templated);GO:0006970(response to osmotic stress);GO:0009408(response to heat);GO:0009409(response to cold);GO:0009414(response to water deprivation);GO:0009651(response to salt stress);GO:0010120(camalexin biosy…	0.274748	undirected	WER	WRKY24
TRINITY_DN76636_c0_g4	-	-	TRINITY_DN69663_c0_g2	han04016(MAPK signaling pathway - plant);han04626(Plant-pathogen interaction)	GO:0003700(DNA binding transcription factor activity);GO:0005515(protein binding);GO:0005634(nucleus);GO:0006351(transcription, DNA-templated);GO:0006355(regulation of transcription, DNA-templated);GO:0006970(response to osmotic stress);GO:0009408(response to heat);GO:0009409(response to cold);GO:0009414(response to water deprivation);GO:0009651(response to salt stress);GO:0010120(camalexin biosy…	0.271662	undirected	-	WRKY24
TRINITY_DN86989_c1_g2	-	-	TRINITY_DN69663_c0_g2	han04016(MAPK signaling pathway - plant);han04626(Plant-pathogen interaction)	GO:0003700(DNA binding transcription factor activity);GO:0005515(protein binding);GO:0005634(nucleus);GO:0006351(transcription, DNA-templated);GO:0006355(regulation of transcription, DNA-templated);GO:0006970(response to osmotic stress);GO:0009408(response to heat);GO:0009409(response to cold);GO:0009414(response to water deprivation);GO:0009651(response to salt stress);GO:0010120(camalexin biosy…	0.270472	undirected	-	WRKY24
TRINITY_DN62361_c1_g5	-	-	TRINITY_DN69663_c0_g2	han04016(MAPK signaling pathway - plant);han04626(Plant-pathogen interaction)	GO:0003700(DNA binding transcription factor activity);GO:0005515(protein binding);GO:0005634(nucleus);GO:0006351(transcription, DNA-templated);GO:0006355(regulation of transcription, DNA-templated);GO:0006970(response to osmotic stress);GO:0009408(response to heat);GO:0009409(response to cold);GO:0009414(response to water deprivation);GO:0009651(response to salt stress);GO:0010120(camalexin biosy…	0.270414	undirected	-	WRKY24
TRINITY_DN68953_c0_g1	han04075(Plant hormone signal transduction)	GO:0003700(DNA binding transcription factor activity);GO:0005515(protein binding);GO:0005634(nucleus);GO:0006351(transcription, DNA-templated);GO:0006355(regulation of transcription, DNA-templated);GO:0009733(response to auxin);GO:0009734(auxin-activated signaling pathway);GO:0009880(embryonic pattern specification);GO:0010051(xylem and phloem pattern formation);GO:0045892(negative regulation of …	TRINITY_DN69663_c0_g2	han04016(MAPK signaling pathway - plant);han04626(Plant-pathogen interaction)	GO:0003700(DNA binding transcription factor activity);GO:0005515(protein binding);GO:0005634(nucleus);GO:0006351(transcription, DNA-templated);GO:0006355(regulation of transcription, DNA-templated);GO:0006970(response to osmotic stress);GO:0009408(response to heat);GO:0009409(response to cold);GO:0009414(response to water deprivation);GO:0009651(response to salt stress);GO:0010120(camalexin biosy…	0.269726	undirected	IAA12	WRKY24
TRINITY_DN57504_c1_g8	han00940(Phenylpropanoid biosynthesis);han00945(Stilbenoid, diarylheptanoid and gingerol biosynthesis);han00941(Flavonoid biosynthesis)	GO:0005737(cytoplasm);GO:0009735(response to cytokinin);GO:0016740(transferase activity)	TRINITY_DN69663_c0_g2	han04016(MAPK signaling pathway - plant);han04626(Plant-pathogen interaction)	GO:0003700(DNA binding transcription factor activity);GO:0005515(protein binding);GO:0005634(nucleus);GO:0006351(transcription, DNA-templated);GO:0006355(regulation of transcription, DNA-templated);GO:0006970(response to osmotic stress);GO:0009408(response to heat);GO:0009409(response to cold);GO:0009414(response to water deprivation);GO:0009651(response to salt stress);GO:0010120(camalexin biosy…	0.267795	undirected	ACT	WRKY24
TRINITY_DN62361_c1_g4	-	-	TRINITY_DN69663_c0_g2	han04016(MAPK signaling pathway - plant);han04626(Plant-pathogen interaction)	GO:0003700(DNA binding transcription factor activity);GO:0005515(protein binding);GO:0005634(nucleus);GO:0006351(transcription, DNA-templated);GO:0006355(regulation of transcription, DNA-templated);GO:0006970(response to osmotic stress);GO:0009408(response to heat);GO:0009409(response to cold);GO:0009414(response to water deprivation);GO:0009651(response to salt stress);GO:0010120(camalexin biosy…	0.267495	undirected	-	WRKY24
TRINITY_DN86853_c0_g3	-	GO:0003677(DNA binding);GO:0005516(calmodulin binding);GO:0005634(nucleus);GO:0006351(transcription, DNA-templated);GO:0006355(regulation of transcription, DNA-templated);GO:0006950(response to stress)	TRINITY_DN69663_c0_g2	han04016(MAPK signaling pathway - plant);han04626(Plant-pathogen interaction)	GO:0003700(DNA binding transcription factor activity);GO:0005515(protein binding);GO:0005634(nucleus);GO:0006351(transcription, DNA-templated);GO:0006355(regulation of transcription, DNA-templated);GO:0006970(response to osmotic stress);GO:0009408(response to heat);GO:0009409(response to cold);GO:0009414(response to water deprivation);GO:0009651(response to salt stress);GO:0010120(camalexin biosy…	0.267052	undirected	CBP60C	WRKY24
TRINITY_DN57425_c0_g1	han00940(Phenylpropanoid biosynthesis);han00945(Stilbenoid, diarylheptanoid and gingerol biosynthesis);han00941(Flavonoid biosynthesis)	GO:0005515(protein binding);GO:0005737(cytoplasm);GO:0005829(cytosol);GO:0009809(lignin biosynthetic process);GO:0009963(positive regulation of flavonoid biosynthetic process);GO:0010252(auxin homeostasis);GO:0016020(membrane);GO:0016740(transferase activity);GO:0047172(shikimate O-hydroxycinnamoyltransferase activity);GO:0047205(quinate O-hydroxycinnamoyltransferase activity);GO:0071555(cell wal…	TRINITY_DN69663_c0_g2	han04016(MAPK signaling pathway - plant);han04626(Plant-pathogen interaction)	GO:0003700(DNA binding transcription factor activity);GO:0005515(protein binding);GO:0005634(nucleus);GO:0006351(transcription, DNA-templated);GO:0006355(regulation of transcription, DNA-templated);GO:0006970(response to osmotic stress);GO:0009408(response to heat);GO:0009409(response to cold);GO:0009414(response to water deprivation);GO:0009651(response to salt stress);GO:0010120(camalexin biosy…	0.265697	undirected	HST	WRKY24
TRINITY_DN75692_c0_g3	-	GO:0003700(DNA binding transcription factor activity);GO:0005634(nucleus);GO:0006355(regulation of transcription, DNA-templated)	TRINITY_DN69663_c0_g2	han04016(MAPK signaling pathway - plant);han04626(Plant-pathogen interaction)	GO:0003700(DNA binding transcription factor activity);GO:0005515(protein binding);GO:0005634(nucleus);GO:0006351(transcription, DNA-templated);GO:0006355(regulation of transcription, DNA-templated);GO:0006970(response to osmotic stress);GO:0009408(response to heat);GO:0009409(response to cold);GO:0009414(response to water deprivation);GO:0009651(response to salt stress);GO:0010120(camalexin biosy…	0.265585	undirected	NLP6	WRKY24
TRINITY_DN65619_c0_g2	-	GO:0003674(molecular_function);GO:0005634(nucleus);GO:0005886(plasma membrane);GO:0008150(biological_process)	TRINITY_DN69663_c0_g2	han04016(MAPK signaling pathway - plant);han04626(Plant-pathogen interaction)	GO:0003700(DNA binding transcription factor activity);GO:0005515(protein binding);GO:0005634(nucleus);GO:0006351(transcription, DNA-templated);GO:0006355(regulation of transcription, DNA-templated);GO:0006970(response to osmotic stress);GO:0009408(response to heat);GO:0009409(response to cold);GO:0009414(response to water deprivation);GO:0009651(response to salt stress);GO:0010120(camalexin biosy…	0.264961	undirected	At1g76070	WRKY24
TRINITY_DN74713_c0_g2	NA(NA)	GO:0004674(protein serine/threonine kinase activity);GO:0004675(transmembrane receptor protein serine/threonine kinase activity);GO:0004713(protein tyrosine kinase activity);GO:0005524(ATP binding);GO:0005886(plasma membrane);GO:0006468(protein phosphorylation);GO:0006952(defense response);GO:0007166(cell surface receptor signaling pathway);GO:0009507(chloroplast);GO:0016301(kinase activity);GO:1…	TRINITY_DN69663_c0_g2	han04016(MAPK signaling pathway - plant);han04626(Plant-pathogen interaction)	GO:0003700(DNA binding transcription factor activity);GO:0005515(protein binding);GO:0005634(nucleus);GO:0006351(transcription, DNA-templated);GO:0006355(regulation of transcription, DNA-templated);GO:0006970(response to osmotic stress);GO:0009408(response to heat);GO:0009409(response to cold);GO:0009414(response to water deprivation);GO:0009651(response to salt stress);GO:0010120(camalexin biosy…	0.262629	undirected	PBL10	WRKY24
TRINITY_DN76106_c1_g1	han00360(Phenylalanine metabolism);han00940(Phenylpropanoid biosynthesis);han00945(Stilbenoid, diarylheptanoid and gingerol biosynthesis);han00941(Flavonoid biosynthesis)	GO:0005634(nucleus);GO:0005829(cytosol);GO:0008171(O-methyltransferase activity);GO:0009805(coumarin biosynthetic process);GO:0009809(lignin biosynthetic process);GO:0032259(methylation);GO:0042409(caffeoyl-CoA O-methyltransferase activity);GO:0046686(response to cadmium ion);GO:0046872(metal ion binding)	TRINITY_DN69663_c0_g2	han04016(MAPK signaling pathway - plant);han04626(Plant-pathogen interaction)	GO:0003700(DNA binding transcription factor activity);GO:0005515(protein binding);GO:0005634(nucleus);GO:0006351(transcription, DNA-templated);GO:0006355(regulation of transcription, DNA-templated);GO:0006970(response to osmotic stress);GO:0009408(response to heat);GO:0009409(response to cold);GO:0009414(response to water deprivation);GO:0009651(response to salt stress);GO:0010120(camalexin biosy…	0.261605	undirected	CCOAOMT	WRKY24
TRINITY_DN62361_c1_g5	-	-	TRINITY_DN54031_c0_g1	han04016(MAPK signaling pathway - plant);han04070(Phosphatidylinositol signaling system);han04626(Plant-pathogen interaction)	GO:0005509(calcium ion binding)	0.284091	undirected	-	CML45
TRINITY_DN60392_c0_g2	-	-	TRINITY_DN54031_c0_g1	han04016(MAPK signaling pathway - plant);han04070(Phosphatidylinositol signaling system);han04626(Plant-pathogen interaction)	GO:0005509(calcium ion binding)	0.273871	undirected	-	CML45
TRINITY_DN75231_c0_g3	-	-	TRINITY_DN54031_c0_g1	han04016(MAPK signaling pathway - plant);han04070(Phosphatidylinositol signaling system);han04626(Plant-pathogen interaction)	GO:0005509(calcium ion binding)	0.270204	undirected	-	CML45
TRINITY_DN61386_c0_g1	-	-	TRINITY_DN54031_c0_g1	han04016(MAPK signaling pathway - plant);han04070(Phosphatidylinositol signaling system);han04626(Plant-pathogen interaction)	GO:0005509(calcium ion binding)	0.259285	undirected	-	CML45
TRINITY_DN65229_c0_g2	-	-	TRINITY_DN54031_c0_g1	han04016(MAPK signaling pathway - plant);han04070(Phosphatidylinositol signaling system);han04626(Plant-pathogen interaction)	GO:0005509(calcium ion binding)	0.258513	undirected	-	CML45
TRINITY_DN55305_c0_g1	-	-	TRINITY_DN54031_c0_g1	han04016(MAPK signaling pathway - plant);han04070(Phosphatidylinositol signaling system);han04626(Plant-pathogen interaction)	GO:0005509(calcium ion binding)	0.238447	undirected	-	CML45
TRINITY_DN65163_c0_g1	-	-	TRINITY_DN54031_c0_g1	han04016(MAPK signaling pathway - plant);han04070(Phosphatidylinositol signaling system);han04626(Plant-pathogen interaction)	GO:0005509(calcium ion binding)	0.234348	undirected	-	CML45
TRINITY_DN58914_c0_g2	-	-	TRINITY_DN54031_c0_g1	han04016(MAPK signaling pathway - plant);han04070(Phosphatidylinositol signaling system);han04626(Plant-pathogen interaction)	GO:0005509(calcium ion binding)	0.225008	undirected	-	CML45
TRINITY_DN73939_c1_g1	-	-	TRINITY_DN54031_c0_g1	han04016(MAPK signaling pathway - plant);han04070(Phosphatidylinositol signaling system);han04626(Plant-pathogen interaction)	GO:0005509(calcium ion binding)	0.222926	undirected	-	CML45
TRINITY_DN74482_c0_g1	-	-	TRINITY_DN54031_c0_g1	han04016(MAPK signaling pathway - plant);han04070(Phosphatidylinositol signaling system);han04626(Plant-pathogen interaction)	GO:0005509(calcium ion binding)	0.219936	undirected	-	CML45
TRINITY_DN64249_c0_g1	NA(NA)	GO:0005739(mitochondrion)	TRINITY_DN54031_c0_g1	han04016(MAPK signaling pathway - plant);han04070(Phosphatidylinositol signaling system);han04626(Plant-pathogen interaction)	GO:0005509(calcium ion binding)	0.219857	undirected	AtMg00810	CML45
TRINITY_DN72436_c0_g2	-	-	TRINITY_DN54031_c0_g1	han04016(MAPK signaling pathway - plant);han04070(Phosphatidylinositol signaling system);han04626(Plant-pathogen interaction)	GO:0005509(calcium ion binding)	0.209358	undirected	-	CML45
TRINITY_DN67866_c0_g4	-	-	TRINITY_DN54031_c0_g1	han04016(MAPK signaling pathway - plant);han04070(Phosphatidylinositol signaling system);han04626(Plant-pathogen interaction)	GO:0005509(calcium ion binding)	0.201238	undirected	-	CML45
TRINITY_DN64076_c0_g1	ccp00910(Nitrogen metabolism)	GO:0005515(protein binding);GO:0005773(vacuole);GO:0005774(vacuolar membrane);GO:0005783(endoplasmic reticulum);GO:0005789(endoplasmic reticulum membrane);GO:0005829(cytosol);GO:0005886(plasma membrane);GO:0009535(chloroplast thylakoid membrane);GO:0016021(integral component of membrane);GO:0020037(heme binding);GO:0046872(metal ion binding);GO:0055114(oxidation-reduction process)	TRINITY_DN54031_c0_g1	han04016(MAPK signaling pathway - plant);han04070(Phosphatidylinositol signaling system);han04626(Plant-pathogen interaction)	GO:0005509(calcium ion binding)	0.200911	undirected	CYB5	CML45
TRINITY_DN62402_c0_g1	-	-	TRINITY_DN54031_c0_g1	han04016(MAPK signaling pathway - plant);han04070(Phosphatidylinositol signaling system);han04626(Plant-pathogen interaction)	GO:0005509(calcium ion binding)	0.190247	undirected	-	CML45
TRINITY_DN64153_c0_g4	-	-	TRINITY_DN54031_c0_g1	han04016(MAPK signaling pathway - plant);han04070(Phosphatidylinositol signaling system);han04626(Plant-pathogen interaction)	GO:0005509(calcium ion binding)	0.186671	undirected	-	CML45
TRINITY_DN75609_c1_g2	-	-	TRINITY_DN54031_c0_g1	han04016(MAPK signaling pathway - plant);han04070(Phosphatidylinositol signaling system);han04626(Plant-pathogen interaction)	GO:0005509(calcium ion binding)	0.177332	undirected	-	CML45
TRINITY_DN86100_c2_g8	-	-	TRINITY_DN54031_c0_g1	han04016(MAPK signaling pathway - plant);han04070(Phosphatidylinositol signaling system);han04626(Plant-pathogen interaction)	GO:0005509(calcium ion binding)	0.175031	undirected	-	CML45
TRINITY_DN62599_c0_g2	-	GO:0005198(structural molecule activity);GO:0005783(endoplasmic reticulum);GO:0005789(endoplasmic reticulum membrane);GO:0008150(biological_process);GO:0016021(integral component of membrane)	TRINITY_DN54031_c0_g1	han04016(MAPK signaling pathway - plant);han04070(Phosphatidylinositol signaling system);han04626(Plant-pathogen interaction)	GO:0005509(calcium ion binding)	0.17438	undirected	PVA13	CML45
TRINITY_DN87857_c2_g3	bna04016(MAPK signaling pathway - plant);bna04070(Phosphatidylinositol signaling system);bna04626(Plant-pathogen interaction)	GO:0005515(protein binding)	TRINITY_DN54031_c0_g1	han04016(MAPK signaling pathway - plant);han04070(Phosphatidylinositol signaling system);han04626(Plant-pathogen interaction)	GO:0005509(calcium ion binding)	0.169237	undirected	CAM-1	CML45
TRINITY_DN54031_c0_g1	han04016(MAPK signaling pathway - plant);han04070(Phosphatidylinositol signaling system);han04626(Plant-pathogen interaction)	GO:0005509(calcium ion binding)	TRINITY_DN72632_c0_g1	han04016(MAPK signaling pathway - plant);han04075(Plant hormone signal transduction);han04626(Plant-pathogen interaction)	GO:0005737(cytoplasm)	0.274663	undirected	CML45	MKK5
TRINITY_DN86989_c1_g2	-	-	TRINITY_DN72632_c0_g1	han04016(MAPK signaling pathway - plant);han04075(Plant hormone signal transduction);han04626(Plant-pathogen interaction)	GO:0005737(cytoplasm)	0.258709	undirected	-	MKK5
TRINITY_DN80121_c0_g1	egr04075(Plant hormone signal transduction)	GO:0003700(DNA binding transcription factor activity);GO:0005634(nucleus);GO:0006355(regulation of transcription, DNA-templated);GO:0043565(sequence-specific DNA binding)	TRINITY_DN72632_c0_g1	han04016(MAPK signaling pathway - plant);han04075(Plant hormone signal transduction);han04626(Plant-pathogen interaction)	GO:0005737(cytoplasm)	0.258144	undirected	SCL14	MKK5
TRINITY_DN66337_c1_g1	NA(NA)	GO:0003677(DNA binding);GO:0003700(DNA binding transcription factor activity);GO:0005515(protein binding);GO:0005634(nucleus);GO:0006351(transcription, DNA-templated);GO:0006355(regulation of transcription, DNA-templated);GO:0009873(ethylene-activated signaling pathway);GO:0010087(phloem or xylem histogenesis);GO:0044212(transcription regulatory region DNA binding);GO:0045893(positive regulation …	TRINITY_DN72632_c0_g1	han04016(MAPK signaling pathway - plant);han04075(Plant hormone signal transduction);han04626(Plant-pathogen interaction)	GO:0005737(cytoplasm)	0.257076	undirected	ERF5	MKK5
TRINITY_DN85189_c0_g1	-	-	TRINITY_DN72632_c0_g1	han04016(MAPK signaling pathway - plant);han04075(Plant hormone signal transduction);han04626(Plant-pathogen interaction)	GO:0005737(cytoplasm)	0.249133	undirected	-	MKK5
TRINITY_DN62803_c0_g1	NA(NA)	GO:0009535(chloroplast thylakoid membrane);GO:0016021(integral component of membrane);GO:0046872(metal ion binding)	TRINITY_DN72632_c0_g1	han04016(MAPK signaling pathway - plant);han04075(Plant hormone signal transduction);han04626(Plant-pathogen interaction)	GO:0005737(cytoplasm)	0.245166	undirected	NIP1	MKK5
TRINITY_DN83893_c0_g1	-	-	TRINITY_DN72632_c0_g1	han04016(MAPK signaling pathway - plant);han04075(Plant hormone signal transduction);han04626(Plant-pathogen interaction)	GO:0005737(cytoplasm)	0.244929	undirected	-	MKK5
TRINITY_DN60750_c0_g1	NA(NA)	GO:0000981(RNA polymerase II transcription factor activity, sequence-specific DNA binding);GO:0001135(transcription factor activity, RNA polymerase II transcription factor recruiting);GO:0003677(DNA binding);GO:0003700(DNA binding transcription factor activity);GO:0005515(protein binding);GO:0005634(nucleus);GO:0006351(transcription, DNA-templated);GO:0006355(regulation of transcription, DNA-temp…	TRINITY_DN72632_c0_g1	han04016(MAPK signaling pathway - plant);han04075(Plant hormone signal transduction);han04626(Plant-pathogen interaction)	GO:0005737(cytoplasm)	0.244052	undirected	WER	MKK5
TRINITY_DN57939_c0_g1	-	-	TRINITY_DN72632_c0_g1	han04016(MAPK signaling pathway - plant);han04075(Plant hormone signal transduction);han04626(Plant-pathogen interaction)	GO:0005737(cytoplasm)	0.243791	undirected	-	MKK5
TRINITY_DN61386_c0_g1	-	-	TRINITY_DN72632_c0_g1	han04016(MAPK signaling pathway - plant);han04075(Plant hormone signal transduction);han04626(Plant-pathogen interaction)	GO:0005737(cytoplasm)	0.241543	undirected	-	MKK5
TRINITY_DN86853_c0_g3	-	GO:0003677(DNA binding);GO:0005516(calmodulin binding);GO:0005634(nucleus);GO:0006351(transcription, DNA-templated);GO:0006355(regulation of transcription, DNA-templated);GO:0006950(response to stress)	TRINITY_DN72632_c0_g1	han04016(MAPK signaling pathway - plant);han04075(Plant hormone signal transduction);han04626(Plant-pathogen interaction)	GO:0005737(cytoplasm)	0.239817	undirected	CBP60C	MKK5
TRINITY_DN65619_c0_g2	-	GO:0003674(molecular_function);GO:0005634(nucleus);GO:0005886(plasma membrane);GO:0008150(biological_process)	TRINITY_DN72632_c0_g1	han04016(MAPK signaling pathway - plant);han04075(Plant hormone signal transduction);han04626(Plant-pathogen interaction)	GO:0005737(cytoplasm)	0.238056	undirected	At1g76070	MKK5
TRINITY_DN57504_c1_g8	han00940(Phenylpropanoid biosynthesis);han00945(Stilbenoid, diarylheptanoid and gingerol biosynthesis);han00941(Flavonoid biosynthesis)	GO:0005737(cytoplasm);GO:0009735(response to cytokinin);GO:0016740(transferase activity)	TRINITY_DN72632_c0_g1	han04016(MAPK signaling pathway - plant);han04075(Plant hormone signal transduction);han04626(Plant-pathogen interaction)	GO:0005737(cytoplasm)	0.236232	undirected	ACT	MKK5
TRINITY_DN68953_c0_g1	han04075(Plant hormone signal transduction)	GO:0003700(DNA binding transcription factor activity);GO:0005515(protein binding);GO:0005634(nucleus);GO:0006351(transcription, DNA-templated);GO:0006355(regulation of transcription, DNA-templated);GO:0009733(response to auxin);GO:0009734(auxin-activated signaling pathway);GO:0009880(embryonic pattern specification);GO:0010051(xylem and phloem pattern formation);GO:0045892(negative regulation of …	TRINITY_DN72632_c0_g1	han04016(MAPK signaling pathway - plant);han04075(Plant hormone signal transduction);han04626(Plant-pathogen interaction)	GO:0005737(cytoplasm)	0.234776	undirected	IAA12	MKK5
TRINITY_DN57939_c0_g10	-	-	TRINITY_DN72632_c0_g1	han04016(MAPK signaling pathway - plant);han04075(Plant hormone signal transduction);han04626(Plant-pathogen interaction)	GO:0005737(cytoplasm)	0.233321	undirected	-	MKK5
TRINITY_DN63909_c0_g6	-	GO:0003674(molecular_function);GO:0005634(nucleus);GO:0010286(heat acclimation)	TRINITY_DN72632_c0_g1	han04016(MAPK signaling pathway - plant);han04075(Plant hormone signal transduction);han04626(Plant-pathogen interaction)	GO:0005737(cytoplasm)	0.233055	undirected	At5g46170	MKK5
TRINITY_DN85638_c1_g1	NA(NA)	GO:0005739(mitochondrion);GO:0005743(mitochondrial inner membrane);GO:0009916(alternative oxidase activity);GO:0016021(integral component of membrane);GO:0046872(metal ion binding);GO:0055114(oxidation-reduction process);GO:0070469(respiratory chain);GO:0102721(ubiquinol:oxygen oxidoreductase activity)	TRINITY_DN72632_c0_g1	han04016(MAPK signaling pathway - plant);han04075(Plant hormone signal transduction);han04626(Plant-pathogen interaction)	GO:0005737(cytoplasm)	0.233054	undirected	AOX3	MKK5
TRINITY_DN73774_c0_g1	lja04016(MAPK signaling pathway - plant);lja04626(Plant-pathogen interaction)	GO:0003700(DNA binding transcription factor activity);GO:0005515(protein binding);GO:0005634(nucleus);GO:0006351(transcription, DNA-templated);GO:0006355(regulation of transcription, DNA-templated);GO:0009867(jasmonic acid mediated signaling pathway);GO:0042742(defense response to bacterium);GO:0043565(sequence-specific DNA binding);GO:0050832(defense response to fungus)	TRINITY_DN72632_c0_g1	han04016(MAPK signaling pathway - plant);han04075(Plant hormone signal transduction);han04626(Plant-pathogen interaction)	GO:0005737(cytoplasm)	0.230461	undirected	WRKY51	MKK5
TRINITY_DN84157_c0_g2	-	-	TRINITY_DN72632_c0_g1	han04016(MAPK signaling pathway - plant);han04075(Plant hormone signal transduction);han04626(Plant-pathogen interaction)	GO:0005737(cytoplasm)	0.23035	undirected	NLP1	MKK5
TRINITY_DN75692_c0_g3	-	GO:0003700(DNA binding transcription factor activity);GO:0005634(nucleus);GO:0006355(regulation of transcription, DNA-templated)	TRINITY_DN72632_c0_g1	han04016(MAPK signaling pathway - plant);han04075(Plant hormone signal transduction);han04626(Plant-pathogen interaction)	GO:0005737(cytoplasm)	0.229027	undirected	NLP6	MKK5
TRINITY_DN54031_c0_g1	han04016(MAPK signaling pathway - plant);han04070(Phosphatidylinositol signaling system);han04626(Plant-pathogen interaction)	GO:0005509(calcium ion binding)	TRINITY_DN73774_c0_g1	lja04016(MAPK signaling pathway - plant);lja04626(Plant-pathogen interaction)	GO:0003700(DNA binding transcription factor activity);GO:0005515(protein binding);GO:0005634(nucleus);GO:0006351(transcription, DNA-templated);GO:0006355(regulation of transcription, DNA-templated);GO:0009867(jasmonic acid mediated signaling pathway);GO:0042742(defense response to bacterium);GO:0043565(sequence-specific DNA binding);GO:0050832(defense response to fungus)	0.288823	undirected	CML45	WRKY51
TRINITY_DN77482_c0_g2	-	GO:0002229(defense response to oomycetes);GO:0003700(DNA binding transcription factor activity);GO:0005516(calmodulin binding);GO:0005634(nucleus);GO:0006351(transcription, DNA-templated);GO:0006355(regulation of transcription, DNA-templated);GO:0009617(response to bacterium);GO:0009626(plant-type hypersensitive response);GO:0010112(regulation of systemic acquired resistance);GO:0010224(response …	TRINITY_DN73774_c0_g1	lja04016(MAPK signaling pathway - plant);lja04626(Plant-pathogen interaction)	GO:0003700(DNA binding transcription factor activity);GO:0005515(protein binding);GO:0005634(nucleus);GO:0006351(transcription, DNA-templated);GO:0006355(regulation of transcription, DNA-templated);GO:0009867(jasmonic acid mediated signaling pathway);GO:0042742(defense response to bacterium);GO:0043565(sequence-specific DNA binding);GO:0050832(defense response to fungus)	0.257863	undirected	SARD1	WRKY51
TRINITY_DN85638_c1_g1	NA(NA)	GO:0005739(mitochondrion);GO:0005743(mitochondrial inner membrane);GO:0009916(alternative oxidase activity);GO:0016021(integral component of membrane);GO:0046872(metal ion binding);GO:0055114(oxidation-reduction process);GO:0070469(respiratory chain);GO:0102721(ubiquinol:oxygen oxidoreductase activity)	TRINITY_DN73774_c0_g1	lja04016(MAPK signaling pathway - plant);lja04626(Plant-pathogen interaction)	GO:0003700(DNA binding transcription factor activity);GO:0005515(protein binding);GO:0005634(nucleus);GO:0006351(transcription, DNA-templated);GO:0006355(regulation of transcription, DNA-templated);GO:0009867(jasmonic acid mediated signaling pathway);GO:0042742(defense response to bacterium);GO:0043565(sequence-specific DNA binding);GO:0050832(defense response to fungus)	0.236562	undirected	AOX3	WRKY51
TRINITY_DN66337_c1_g1	NA(NA)	GO:0003677(DNA binding);GO:0003700(DNA binding transcription factor activity);GO:0005515(protein binding);GO:0005634(nucleus);GO:0006351(transcription, DNA-templated);GO:0006355(regulation of transcription, DNA-templated);GO:0009873(ethylene-activated signaling pathway);GO:0010087(phloem or xylem histogenesis);GO:0044212(transcription regulatory region DNA binding);GO:0045893(positive regulation …	TRINITY_DN73774_c0_g1	lja04016(MAPK signaling pathway - plant);lja04626(Plant-pathogen interaction)	GO:0003700(DNA binding transcription factor activity);GO:0005515(protein binding);GO:0005634(nucleus);GO:0006351(transcription, DNA-templated);GO:0006355(regulation of transcription, DNA-templated);GO:0009867(jasmonic acid mediated signaling pathway);GO:0042742(defense response to bacterium);GO:0043565(sequence-specific DNA binding);GO:0050832(defense response to fungus)	0.233825	undirected	ERF5	WRKY51
TRINITY_DN58470_c0_g1	-	-	TRINITY_DN73774_c0_g1	lja04016(MAPK signaling pathway - plant);lja04626(Plant-pathogen interaction)	GO:0003700(DNA binding transcription factor activity);GO:0005515(protein binding);GO:0005634(nucleus);GO:0006351(transcription, DNA-templated);GO:0006355(regulation of transcription, DNA-templated);GO:0009867(jasmonic acid mediated signaling pathway);GO:0042742(defense response to bacterium);GO:0043565(sequence-specific DNA binding);GO:0050832(defense response to fungus)	0.23176	undirected	-	WRKY51
TRINITY_DN64501_c0_g2	-	-	TRINITY_DN73774_c0_g1	lja04016(MAPK signaling pathway - plant);lja04626(Plant-pathogen interaction)	GO:0003700(DNA binding transcription factor activity);GO:0005515(protein binding);GO:0005634(nucleus);GO:0006351(transcription, DNA-templated);GO:0006355(regulation of transcription, DNA-templated);GO:0009867(jasmonic acid mediated signaling pathway);GO:0042742(defense response to bacterium);GO:0043565(sequence-specific DNA binding);GO:0050832(defense response to fungus)	0.225237	undirected	-	WRKY51
TRINITY_DN60750_c0_g1	NA(NA)	GO:0000981(RNA polymerase II transcription factor activity, sequence-specific DNA binding);GO:0001135(transcription factor activity, RNA polymerase II transcription factor recruiting);GO:0003677(DNA binding);GO:0003700(DNA binding transcription factor activity);GO:0005515(protein binding);GO:0005634(nucleus);GO:0006351(transcription, DNA-templated);GO:0006355(regulation of transcription, DNA-temp…	TRINITY_DN73774_c0_g1	lja04016(MAPK signaling pathway - plant);lja04626(Plant-pathogen interaction)	GO:0003700(DNA binding transcription factor activity);GO:0005515(protein binding);GO:0005634(nucleus);GO:0006351(transcription, DNA-templated);GO:0006355(regulation of transcription, DNA-templated);GO:0009867(jasmonic acid mediated signaling pathway);GO:0042742(defense response to bacterium);GO:0043565(sequence-specific DNA binding);GO:0050832(defense response to fungus)	0.22402	undirected	WER	WRKY51
TRINITY_DN86853_c0_g3	-	GO:0003677(DNA binding);GO:0005516(calmodulin binding);GO:0005634(nucleus);GO:0006351(transcription, DNA-templated);GO:0006355(regulation of transcription, DNA-templated);GO:0006950(response to stress)	TRINITY_DN73774_c0_g1	lja04016(MAPK signaling pathway - plant);lja04626(Plant-pathogen interaction)	GO:0003700(DNA binding transcription factor activity);GO:0005515(protein binding);GO:0005634(nucleus);GO:0006351(transcription, DNA-templated);GO:0006355(regulation of transcription, DNA-templated);GO:0009867(jasmonic acid mediated signaling pathway);GO:0042742(defense response to bacterium);GO:0043565(sequence-specific DNA binding);GO:0050832(defense response to fungus)	0.221101	undirected	CBP60C	WRKY51
TRINITY_DN72742_c0_g3	NA(NA)	GO:0004675(transmembrane receptor protein serine/threonine kinase activity);GO:0005524(ATP binding);GO:0005886(plasma membrane);GO:0006468(protein phosphorylation);GO:0006952(defense response);GO:0007166(cell surface receptor signaling pathway);GO:0009507(chloroplast);GO:0016301(kinase activity)	TRINITY_DN73774_c0_g1	lja04016(MAPK signaling pathway - plant);lja04626(Plant-pathogen interaction)	GO:0003700(DNA binding transcription factor activity);GO:0005515(protein binding);GO:0005634(nucleus);GO:0006351(transcription, DNA-templated);GO:0006355(regulation of transcription, DNA-templated);GO:0009867(jasmonic acid mediated signaling pathway);GO:0042742(defense response to bacterium);GO:0043565(sequence-specific DNA binding);GO:0050832(defense response to fungus)	0.220392	undirected	PBL11	WRKY51
TRINITY_DN57939_c0_g10	-	-	TRINITY_DN73774_c0_g1	lja04016(MAPK signaling pathway - plant);lja04626(Plant-pathogen interaction)	GO:0003700(DNA binding transcription factor activity);GO:0005515(protein binding);GO:0005634(nucleus);GO:0006351(transcription, DNA-templated);GO:0006355(regulation of transcription, DNA-templated);GO:0009867(jasmonic acid mediated signaling pathway);GO:0042742(defense response to bacterium);GO:0043565(sequence-specific DNA binding);GO:0050832(defense response to fungus)	0.219294	undirected	-	WRKY51
TRINITY_DN53759_c0_g1	-	-	TRINITY_DN73774_c0_g1	lja04016(MAPK signaling pathway - plant);lja04626(Plant-pathogen interaction)	GO:0003700(DNA binding transcription factor activity);GO:0005515(protein binding);GO:0005634(nucleus);GO:0006351(transcription, DNA-templated);GO:0006355(regulation of transcription, DNA-templated);GO:0009867(jasmonic acid mediated signaling pathway);GO:0042742(defense response to bacterium);GO:0043565(sequence-specific DNA binding);GO:0050832(defense response to fungus)	0.218186	undirected	-	WRKY51
TRINITY_DN75692_c0_g3	-	GO:0003700(DNA binding transcription factor activity);GO:0005634(nucleus);GO:0006355(regulation of transcription, DNA-templated)	TRINITY_DN73774_c0_g1	lja04016(MAPK signaling pathway - plant);lja04626(Plant-pathogen interaction)	GO:0003700(DNA binding transcription factor activity);GO:0005515(protein binding);GO:0005634(nucleus);GO:0006351(transcription, DNA-templated);GO:0006355(regulation of transcription, DNA-templated);GO:0009867(jasmonic acid mediated signaling pathway);GO:0042742(defense response to bacterium);GO:0043565(sequence-specific DNA binding);GO:0050832(defense response to fungus)	0.217218	undirected	NLP6	WRKY51
TRINITY_DN84157_c0_g2	-	-	TRINITY_DN73774_c0_g1	lja04016(MAPK signaling pathway - plant);lja04626(Plant-pathogen interaction)	GO:0003700(DNA binding transcription factor activity);GO:0005515(protein binding);GO:0005634(nucleus);GO:0006351(transcription, DNA-templated);GO:0006355(regulation of transcription, DNA-templated);GO:0009867(jasmonic acid mediated signaling pathway);GO:0042742(defense response to bacterium);GO:0043565(sequence-specific DNA binding);GO:0050832(defense response to fungus)	0.216287	undirected	NLP1	WRKY51
TRINITY_DN79270_c0_g3	NA(NA)	GO:0000977(RNA polymerase II regulatory region sequence-specific DNA binding);GO:0001085(RNA polymerase II transcription factor binding);GO:0001228(transcriptional activator activity, RNA polymerase II transcription regulatory region sequence-specific DNA binding);GO:0003682(chromatin binding);GO:0005634(nucleus);GO:0005667(transcription factor complex);GO:0030154(cell differentiation)	TRINITY_DN73774_c0_g1	lja04016(MAPK signaling pathway - plant);lja04626(Plant-pathogen interaction)	GO:0003700(DNA binding transcription factor activity);GO:0005515(protein binding);GO:0005634(nucleus);GO:0006351(transcription, DNA-templated);GO:0006355(regulation of transcription, DNA-templated);GO:0009867(jasmonic acid mediated signaling pathway);GO:0042742(defense response to bacterium);GO:0043565(sequence-specific DNA binding);GO:0050832(defense response to fungus)	0.214547	undirected	GATA5	WRKY51
TRINITY_DN60392_c0_g2	-	-	TRINITY_DN73774_c0_g1	lja04016(MAPK signaling pathway - plant);lja04626(Plant-pathogen interaction)	GO:0003700(DNA binding transcription factor activity);GO:0005515(protein binding);GO:0005634(nucleus);GO:0006351(transcription, DNA-templated);GO:0006355(regulation of transcription, DNA-templated);GO:0009867(jasmonic acid mediated signaling pathway);GO:0042742(defense response to bacterium);GO:0043565(sequence-specific DNA binding);GO:0050832(defense response to fungus)	0.213807	undirected	-	WRKY51
TRINITY_DN58914_c0_g2	-	-	TRINITY_DN73774_c0_g1	lja04016(MAPK signaling pathway - plant);lja04626(Plant-pathogen interaction)	GO:0003700(DNA binding transcription factor activity);GO:0005515(protein binding);GO:0005634(nucleus);GO:0006351(transcription, DNA-templated);GO:0006355(regulation of transcription, DNA-templated);GO:0009867(jasmonic acid mediated signaling pathway);GO:0042742(defense response to bacterium);GO:0043565(sequence-specific DNA binding);GO:0050832(defense response to fungus)	0.211988	undirected	-	WRKY51
TRINITY_DN64944_c1_g4	-	-	TRINITY_DN73774_c0_g1	lja04016(MAPK signaling pathway - plant);lja04626(Plant-pathogen interaction)	GO:0003700(DNA binding transcription factor activity);GO:0005515(protein binding);GO:0005634(nucleus);GO:0006351(transcription, DNA-templated);GO:0006355(regulation of transcription, DNA-templated);GO:0009867(jasmonic acid mediated signaling pathway);GO:0042742(defense response to bacterium);GO:0043565(sequence-specific DNA binding);GO:0050832(defense response to fungus)	0.211144	undirected	-	WRKY51
TRINITY_DN63909_c0_g6	-	GO:0003674(molecular_function);GO:0005634(nucleus);GO:0010286(heat acclimation)	TRINITY_DN73774_c0_g1	lja04016(MAPK signaling pathway - plant);lja04626(Plant-pathogen interaction)	GO:0003700(DNA binding transcription factor activity);GO:0005515(protein binding);GO:0005634(nucleus);GO:0006351(transcription, DNA-templated);GO:0006355(regulation of transcription, DNA-templated);GO:0009867(jasmonic acid mediated signaling pathway);GO:0042742(defense response to bacterium);GO:0043565(sequence-specific DNA binding);GO:0050832(defense response to fungus)	0.209695	undirected	At5g46170	WRKY51
TRINITY_DN62361_c1_g4	-	-	TRINITY_DN73774_c0_g1	lja04016(MAPK signaling pathway - plant);lja04626(Plant-pathogen interaction)	GO:0003700(DNA binding transcription factor activity);GO:0005515(protein binding);GO:0005634(nucleus);GO:0006351(transcription, DNA-templated);GO:0006355(regulation of transcription, DNA-templated);GO:0009867(jasmonic acid mediated signaling pathway);GO:0042742(defense response to bacterium);GO:0043565(sequence-specific DNA binding);GO:0050832(defense response to fungus)	0.209293	undirected	-	WRKY51
TRINITY_DN72126_c0_g1	nnu04626(Plant-pathogen interaction)	GO:0005524(ATP binding);GO:0006952(defense response);GO:0043531(ADP binding)	TRINITY_DN73774_c0_g1	lja04016(MAPK signaling pathway - plant);lja04626(Plant-pathogen interaction)	GO:0003700(DNA binding transcription factor activity);GO:0005515(protein binding);GO:0005634(nucleus);GO:0006351(transcription, DNA-templated);GO:0006355(regulation of transcription, DNA-templated);GO:0009867(jasmonic acid mediated signaling pathway);GO:0042742(defense response to bacterium);GO:0043565(sequence-specific DNA binding);GO:0050832(defense response to fungus)	0.207146	undirected	RPP13L3	WRKY51
